# Supplementary material for: Scoping review exploring vocational rehabilitation interventions for mental health service users with chronic mental illness in low-income to upper-middle-income countries
Source: PubMed Central journal article supplement — BMJ Open. 2022 May 9;12(5):e059211. doi: 10.1136/bmjopen-2021-059211 (PMC9086611; doi:10.1136/bmjopen-2021-059211), 2022-05-09
Supplement: bmjopen-2021-059211.draft_revisions.pdf [file bmjopen-2021-059211.draft_revisions.pdf]

# BMJ Open

BMJ Open is committed to open peer review. As part of this commitment we make the peer review history of every article we publish publicly available.

When an article is published we post the peer reviewers' comments and the authors' responses online. We also post the versions of the paper that were used during peer review. These are the versions that the peer review comments apply to.

The versions of the paper that follow are the versions that were submitted during the peer review process. They are not the versions of record or the final published versions. They should not be cited or distributed as the published version of this manuscript.

BMJ Open is an open access journal and the full, final, typeset and author-corrected version of record of the manuscript is available on our site with no access controls, subscription charges or pay-per-view fees (<http://bmjopen.bmj.com>).

If you have any questions on BMJ Open's open peer review process please email [info.bmjopen@bmj.com](mailto:info.bmjopen@bmj.com)

# BMJ Open

## A scoping review exploring vocational rehabilitation interventions for mental health service users with chronic mental illness in low to upper-middle-income countries

|                               |                                                                                                                                                                                                                                                                                                                                                      |
|-------------------------------|------------------------------------------------------------------------------------------------------------------------------------------------------------------------------------------------------------------------------------------------------------------------------------------------------------------------------------------------------|
| Journal:                      | <i>BMJ Open</i>                                                                                                                                                                                                                                                                                                                                      |
| Manuscript ID                 | bmjopen-2021-059211                                                                                                                                                                                                                                                                                                                                  |
| Article Type:                 | Original research                                                                                                                                                                                                                                                                                                                                    |
| Date Submitted by the Author: | 11-Nov-2021                                                                                                                                                                                                                                                                                                                                          |
| Complete List of Authors:     | Chimara, Munyaradzi; University of Namibia Faculty of Health Sciences, Occupational Therapy & Physiotherapy<br>Van Niekerk, Lana; Stellenbosch University Faculty of Medicine and Health Sciences, Health and Rehabilitation<br>van Biljon, Hester Maria; Stellenbosch University Faculty of Medicine and Health Sciences, Health and Rehabilitation |
| Keywords:                     | REHABILITATION MEDICINE, Adult psychiatry < PSYCHIATRY, MENTAL HEALTH                                                                                                                                                                                                                                                                                |
|                               |                                                                                                                                                                                                                                                                                                                                                      |

SCHOLARONE™  
Manuscripts

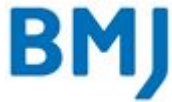

I, the Submitting Author has the right to grant and does grant on behalf of all authors of the Work (as defined in the below author licence), an exclusive licence and/or a non-exclusive licence for contributions from authors who are: i) UK Crown employees; ii) where BMJ has agreed a CC-BY licence shall apply, and/or iii) in accordance with the terms applicable for US Federal Government officers or employees acting as part of their official duties; on a worldwide, perpetual, irrevocable, royalty-free basis to BMJ Publishing Group Ltd ("BMJ") its licensees and where the relevant Journal is co-owned by BMJ to the co-owners of the Journal, to publish the Work in this journal and any other BMJ products and to exploit all rights, as set out in our [licence](#).

The Submitting Author accepts and understands that any supply made under these terms is made by BMJ to the Submitting Author unless you are acting as an employee on behalf of your employer or a postgraduate student of an affiliated institution which is paying any applicable article publishing charge ("APC") for Open Access articles. Where the Submitting Author wishes to make the Work available on an Open Access basis (and intends to pay the relevant APC), the terms of reuse of such Open Access shall be governed by a Creative Commons licence – details of these licences and which [Creative Commons](#) licence will apply to this Work are set out in our licence referred to above.

Other than as permitted in any relevant BMJ Author's Self Archiving Policies, I confirm this Work has not been accepted for publication elsewhere, is not being considered for publication elsewhere and does not duplicate material already published. I confirm all authors consent to publication of this Work and authorise the granting of this licence.

## Title

**A scoping review exploring vocational rehabilitation interventions for mental health service users with chronic mental illness in low to upper-middle-income countries**

**Author:** Munyaradzi Chimara (Corresponding Author)  
**Postal Address:** P.O. Box 50738, Bachbrecht, Windhoek, Namibia  
**Department:** Occupational Therapy and Physiotherapy  
**Institution:** University of Namibia  
**City:** Windhoek  
**Country:** Namibia  
**Email Address:** [munyagreen@hotmail.com](mailto:munyagreen@hotmail.com) or [mchimara@unam.na](mailto:mchimara@unam.na)  
**Telephone:** +264 813 906 771 and +264 61 206 5083  
**ORCID** 0000-0002-5720-3867

**Co-author 1:** Lana van Niekerk  
**Department:** Division of Occupational Therapy, Department of Health and Rehabilitation Sciences, Faculty of Medicine and Health Sciences.  
**Institution:** Stellenbosch University  
**City:** Cape Town  
**Country:** South Africa  
**Email:** [lanavn@sun.ac.za](mailto:lanavn@sun.ac.za)  
**ORCID** 0000-0003-0003-6006

**Co-author 2:** Hester Maria van Biljon  
**Department:** Division of Occupational Therapy, Department of Health and Rehabilitation Sciences, Faculty of Medicine and Health Sciences  
**Institution:** Stellenbosch University  
**City:** Cape Town  
**Country:** South Africa  
**Email:** [hestermvanbiljon@gmail.com](mailto:hestermvanbiljon@gmail.com)  
**ORCID** 0000-0003-4433-6457

**Wordcount:** 4734

## Abstract

### Introduction

Occupational therapists assist mental health service users (MHSUs) who have chronic mental illness gain or maintain a worker role through various vocational rehabilitation intervention strategies. The objective of this scoping review was to provide a summary of research undertaken on vocational rehabilitation interventions for MHSUs with chronic mental illness, within the occupational therapy scope of practice, in low to upper middle-income countries (L-UMIC).

## Methods

The scoping review followed a five-stage methodological framework proposed by Arksey and O'Malley, in conjunction with the Preferred Reporting Items for Systematic Reviews extension for Scoping Reviews (PRISM-ScR) and Joanna Briggs scoping review guidelines. A comprehensive search was done covering the following databases: PsycInfo, EBSCOhost, HINARI, Google scholar, Medline, CINAHL, PubMed, Cochrane Library, Scopus, Science Direct and Wiley online Library. Mendeley referencing software was used for initial deduplication, whereas Rayyan open-source web platform was used for title, abstract and full text screening. Microsoft Excel was used for data extraction. Data was sifted and sorted by key categories and themes using a data charting form.

## Results

Eight hundred and ninety-five (n=895) sources were identified after deduplication, of which 688 sources were excluded through title and abstract screening. Two hundred and seven (n=207) full text screening was done and 12 sources were included for qualitative synthesis. Types of vocational rehabilitation intervention identified included supported employment, case management and prevocational skills training. Client centeredness, support and empowerment were the key vocational rehabilitation principles identified. Teaching illness self-management, job analysis and matching, job coaching, trial placement, and vocational guidance and counseling, and work hardening were the main intervention strategies reported.

## Conclusion

Vocational rehabilitation intervention in healthcare settings for MHSUs in L-UMIC acknowledged the multidimensional uniqueness of individual MHSU's vocational ability, needs and context. Such interventions allowed client centered approaches that offered support, and empowerment beyond the boundaries of the healthcare institutions. Institution based occupational therapists in VR need to implement their intervention in contexts where MHSUs are working or intending to work.

## Ethics

Ethical clearance for this study was not required as secondary data was utilised and there was no MHSUs involved.

## Strength and limitations of the study

- The study followed a scoping review protocol that was peer reviewed and published in BMJ Open on 14 July 2021.<sup>(1)</sup>
- Pre-scheduled weekly meetings among the three authors were used to promote momentum and discussions throughout the project.
- The authors used human and other library resources from two universities, namely the University of Namibia and Stellenbosch University.
- Authors concede that sources from non-English speaking countries might have been missed and that many such countries fall within the socio-economic inclusion criteria. The review was limited to English sources as there was no funding available for translation.
- Due to the dearth of publications from L-UMIC the evidence presented in this article cannot be seen to represent vocational rehabilitation for MHSUs within the scope of occupational therapy globally.

**Key words:** vocational rehabilitation, chronic mental illness, occupational therapy

## Introduction

Vocational Rehabilitation (VR) of mental health service users (MHSUs) with chronic mental illness is an area of concern in low to upper middle-income countries (L-UMIC). The majority of global burden of mental disorders is located in L-UMIC<sup>(2)</sup>, yet public expenditure on mental health, including rehabilitation services, is very low in these countries where less than one percent of total budget is allocated for mental health with resources predominantly directed to institution based care.<sup>(3,4)</sup>

The World Bank classifies countries according to their gross national income (GNI) per capita in United States (US) dollars.<sup>(5)</sup> There are four classes of economies. For the 2022 fiscal year the GNI per capita for low-income economies was \$1046 or less; for lower middle income economies \$1046 to \$4095; upper middle-income economies ranged from \$4096 to \$12 695; and high-income economies were those with GNI per capita of \$12 696 or more.<sup>(6)</sup>

Chronic mental illness can be defined using three criteria suggested by Bachrach<sup>(7)</sup>, namely diagnostic criterion, duration of illness and disability criterion. The Diagnostic and Statistical Manual of Mental Disorders fifth edition (DSM-5) developed by the American Psychiatric Association is widely used in L-UMIC for the diagnostic criteria. Using the DSM-5, common mental conditions include schizophrenia spectrum and other psychotic conditions, bipolar and related disorders, depressive disorders and anxiety disorders.<sup>(8)</sup> In this review, duration of mental illness considered for chronicity was two years regardless of the number of relapses and remissions. The disability criterion, which is perhaps the most important of the three criteria for chronicity from the perspective of rehabilitation personnel, entails disturbing behavior, impairment in work and non-work activities and mild impairment in basic needs.<sup>(7)</sup>

Occupational therapists play an important role in vocational rehabilitation (VR) of mental health service users (MHSUs) with chronic mental illness who are either employed, unemployed or on sick leave.<sup>(9)</sup> Through VR occupational therapists help MHSUs to gain work, return to work or maintain an existing worker role.<sup>(10)</sup> Ross<sup>(10)</sup> highlights six stages followed in the VR process that are somewhat similar to the occupational therapy process. These are referral, assessment, prevocational phase, worksite visit, return to work plan, intervention, evaluation and discharge. Following the VR process, occupational therapists apply various VR strategies, and work with a variety of people and professions spanning both industrial and healthcare sectors.<sup>(9)</sup> They employ a variety of occupational therapy professional competencies that include activity analysis, job analysis, identification of essential job functions, knowledge of mental health conditions, functional capacity evaluations etc.<sup>(11)</sup> For the purposes of this review, intervention is seen as all aspects of VR when an occupational therapist interacts with a MHSU with the aim of addressing vocational occupation. In this review, institution-based VR is VR for MHSUs provided by occupational therapists stationed at a hospital, correctional facility, rehabilitation centre or healthcare centre. The receivers of VR service could be inpatients or outpatients.

There is limited consensus in the literature on the definition of the concept and categorization of VR intervention offered by occupational therapists. One plausible categorization of VR types is by van Biljon et al<sup>(12)</sup> who identified six types, namely, prevention, screening, assessment, intervention, placement and follow-up. VR intervention focuses on correcting or

1  
2  
3 compensating for work ability deficits and improve work performance.<sup>(12)</sup> Suijkerbuijk et al<sup>(13)</sup>  
4 identified four types of VR interventions. These are (i) prevocational training, (ii) transitional  
5 employment, (iii) supported employment, and (iv) augmented supported employment.  
6 Prevocational skills training includes job-related skills training and symptom-related skills  
7 training, with the latter comprising cognitive training and social skills training. Transitional  
8 employment is a highly structured intervention program where MHSUs who have expressed  
9 the desire to work are placed in the open labour market on a part-time basis for a period ranging  
10 from six to nine months.<sup>(14)</sup> During the period of transitional employment, MHSUs receive on-  
11 the-job and off-site support from the VR team. Unlike transitional employment, supported  
12 employment usually has no time limit, MHSUs follow a competitive interview process for the  
13 position, and they are paid at the prevailing wage of the position.<sup>(14)</sup> Supported employment is  
14 a career-oriented VR intervention where a MHSU is assisted accessing and being successful  
15 with employment through on-the-job and offsite support. Augmented supported employment  
16 is a combination of supported employment with either prevocational training or transitional  
17 employment. In addition to VR interventions identified by Suijkerbuijk et al<sup>(13)</sup>, Swart and  
18 Buys<sup>(11)</sup> included work-hardening and case management. It is important to note that these VR  
19 intervention types do not necessarily follow a sequential process. Also, VR intervention  
20 categories seem to be overlapping. For example, Suijkerbuijk et al<sup>(13)</sup> categorized transitional  
21 and supported employment as VR intervention types, whereas van Biljon et al<sup>(12)</sup> categorized  
22 these under placement.  
23

24 Vocational rehabilitation outcomes have been differentiated as hard outcomes or soft  
25 outcomes.<sup>(10)</sup> Ross<sup>(10)</sup> contends that soft outcomes are measures applicable to service users  
26 believed to be furthest away from labour market and therefore need a greater number of  
27 stepping stones. Examples of soft VR outcomes include engaging in voluntary work, doing a  
28 training course or achieving better quality of life. Examples of hard VR outcomes are; reduced  
29 number of days of absence from work, increased chances of returning to work, and improved  
30 benefit-to-cost ratios.<sup>(10)</sup> Other VR outcomes include improved self-esteem and self-concept,  
31 reduced symptoms of mental illness, increased personal empowerment and higher ratings of  
32 subjective wellbeing.<sup>(15)</sup>  
33

### 34 Rationale

35 This scoping review comprises the first of four phases the authors will follow in developing a  
36 contextually relevant VR framework for MHSUs with chronic mental illness in Namibia. The  
37 purpose of this scoping review was to map the current evidence on institution-based VR for  
38 MHSUs with chronic mental illness that fall within the occupational therapy scope of practice  
39 and originate in L-UMIC. A scoping review was selected because it allows for exploring the  
40 breadth and depth of available evidence for the given population, concept and context.<sup>(16)</sup> The  
41 review findings will inform the second phase of the primary author's doctoral study, which  
42 will focus on engaging with stakeholders to explore factors that should be considered by  
43 clinical occupational therapists for their VR with MHSU's in Namibia.<sup>(1)</sup>  
44

45 Traditional VR interventions for MHSUs that require institutionalization are still being used in  
46 some L-MIC. The first author, who is an occupational therapist, has ten years' experience in  
47 VR of MHSUs at a mental health care institution in Windhoek Namibia. The first author's  
48 experience and observation in the Namibian context is that occupational therapists who engage  
49 in VR practice are institution based. These institutions include hospitals, correctional facilities  
50 and healthcare centres. MHSUs who receive VR service are either in-patients or outpatients.  
51  
52  
53  
54  
55  
56  
57  
58  
59  
60

1  
2  
3 These services are offered without a contextually relevant VR framework to guide occupational  
4 therapists in settings such as Namibia.  
5

### 6 Review Question

7 What is known from the existing literature about healthcare institution-based VR for MHSUs  
8 with chronic mental illness from L-UMIC?  
9

### 10 Objectives

- 11 i. Provide a detailed overview of all the studies on institution-based VR of MHSUs with  
12 chronic mental illness, within the occupational therapy scope of practice, in L-UMIC.
- 13 ii. Identify the different types, principles and strategies of institution-based VR  
14 interventions within the occupational therapy scope of practice for MHSUs who have  
15 chronic mental illness in L-UMIC.  
16  
17  
18

## 19 Methods

### 20 Study Design

21 This scoping review followed a protocol<sup>(1)</sup> that was peer reviewed and published in the BMJ  
22 Open. As highlighted in the protocol, the scoping review was guided by a methodological  
23 framework originally suggested by Arksey and O'Malley<sup>(17)</sup>, and subsequently refined by  
24 Levac et al<sup>(18)</sup> and Colquhoun et al<sup>(19)</sup>. The framework follows five successive steps namely;  
25 (i) defining the research question, (ii) identifying relevant studies, (iii) study selection, (iv)  
26 charting the data, and finally (v) collating, summarizing and reporting the results. Reporting of  
27 the findings of this review was guided by the Preferred Reporting Items for Systematic Reviews  
28 extension for Scoping Reviews (PRISMA-ScR) proposed by Tricco et al.<sup>(20)</sup> The PRISMA-  
29 ScR checklist used is attached as annex A.  
30  
31  
32  
33

### 34 Eligibility Criteria

35 The population, concept and context (PCC) criteria<sup>(21)</sup> was used to define the eligibility criteria.  
36 The population (P) was MHSUs who have chronic mental illness. Chronic mental illness was  
37 based on three aspects, (i) diagnosis criteria, (ii) period of illness, and (iii) the disability  
38 criteria.<sup>(7)</sup> The concept (C) was institution-based VR within occupational therapy scope of  
39 practice. In this study, VR is defined as evidence-based approach that is provided in different  
40 settings, services and activities to working age individuals with mental health-related  
41 impairments, limitations or restrictions with work, and whose primary aim is to optimise work  
42 participation.<sup>(11)</sup> The context (C) was L-UMIC as defined by World Bank income grouping.  
43 Sources published in English only between 2011 and 2021 were eligible for inclusion.  
44  
45  
46

### 47 Search Strategy

48 The search strategy was developed with the assistance of a qualified subject librarian from the  
49 University of Stellenbosch. A preliminary search was conducted on two databases, Pubmed  
50 and CINAHL. Results of the preliminary search led to the refinement of the search strategy  
51 covering all the three elements (PCC) of the scoping review question. The following main  
52 search string was used for identifying relevant sources: ( ("Psychiatric Rehabilitation" OR  
53 "Rehabilitation, Vocational" OR "work rehabilitation" OR "Occupational Therapy" ) AND (   
54 mental disorders OR mental illness OR psychiatric disorders OR psychiatric illness ) NOT (   
55 "North America" OR Europe\* ) ) AND ( (severe OR chronic OR long-term OR persistent) ).  
56 The search was carried out in each of the following electronic data bases; PsycInfo,  
57 EBSCOhost, Google Scholar, Medline, CINAHL, PubMed, Cochrane library, Scopus, Science  
58  
59  
60



1  
2  
3 Direct, HINARI and Wiley online. Grey literature sources were searched through library links  
4 for universities subscribed to by all three authors engaged in this review. Additional search was  
5 done through checking bibliographies of all the included sources.  
6

### 7 Source of Evidence Screening and Selection

8 Sources that were identified through the above mentioned search strategy were uploaded in  
9 Mendeley Reference Manager<sup>(22)</sup> and initial deduplication was done. Sources were then  
10 exported from Mendeley to Rayyan<sup>(23)</sup> web application for systematic reviews where second  
11 deduplication was conducted. The first and third authors independently performed title and  
12 abstract screening of the uploaded sources guided by the PCC and inclusion criteria. The  
13 authors included peer-reviewed sources on VR interventions that fit into the occupational  
14 therapy scope and were published in English between 2011 and 2021 from L-UMICs.<sup>(1)</sup> The  
15 second author resolved conflicts and her vote was final in making the decision to include or  
16 exclude a source. A second project was opened in Rayyan<sup>(23)</sup> where sources that were screened  
17 for title and abstract were loaded for full text screening. The first and third author did full text  
18 screening of first three sources together before they independently screened the rest of the  
19 sources. Conflicts were discussed and resolved with input from the second author, and the  
20 inclusion or exclusion criteria was regularly checked. Figure 1 below is the PRISMA flow  
21 diagram illustrating the process of searching and selecting sources for inclusion in this review.  
22  
23  
24  
25  
26  
27  
28  
29  
30  
31  
32  
33  
34  
35  
36  
37  
38  
39  
40  
41  
42  
43  
44  
45  
46  
47  
48  
49  
50  
51  
52  
53  
54  
55  
56  
57  
58  
59  
60

Figure 1; PRISMA flow diagram

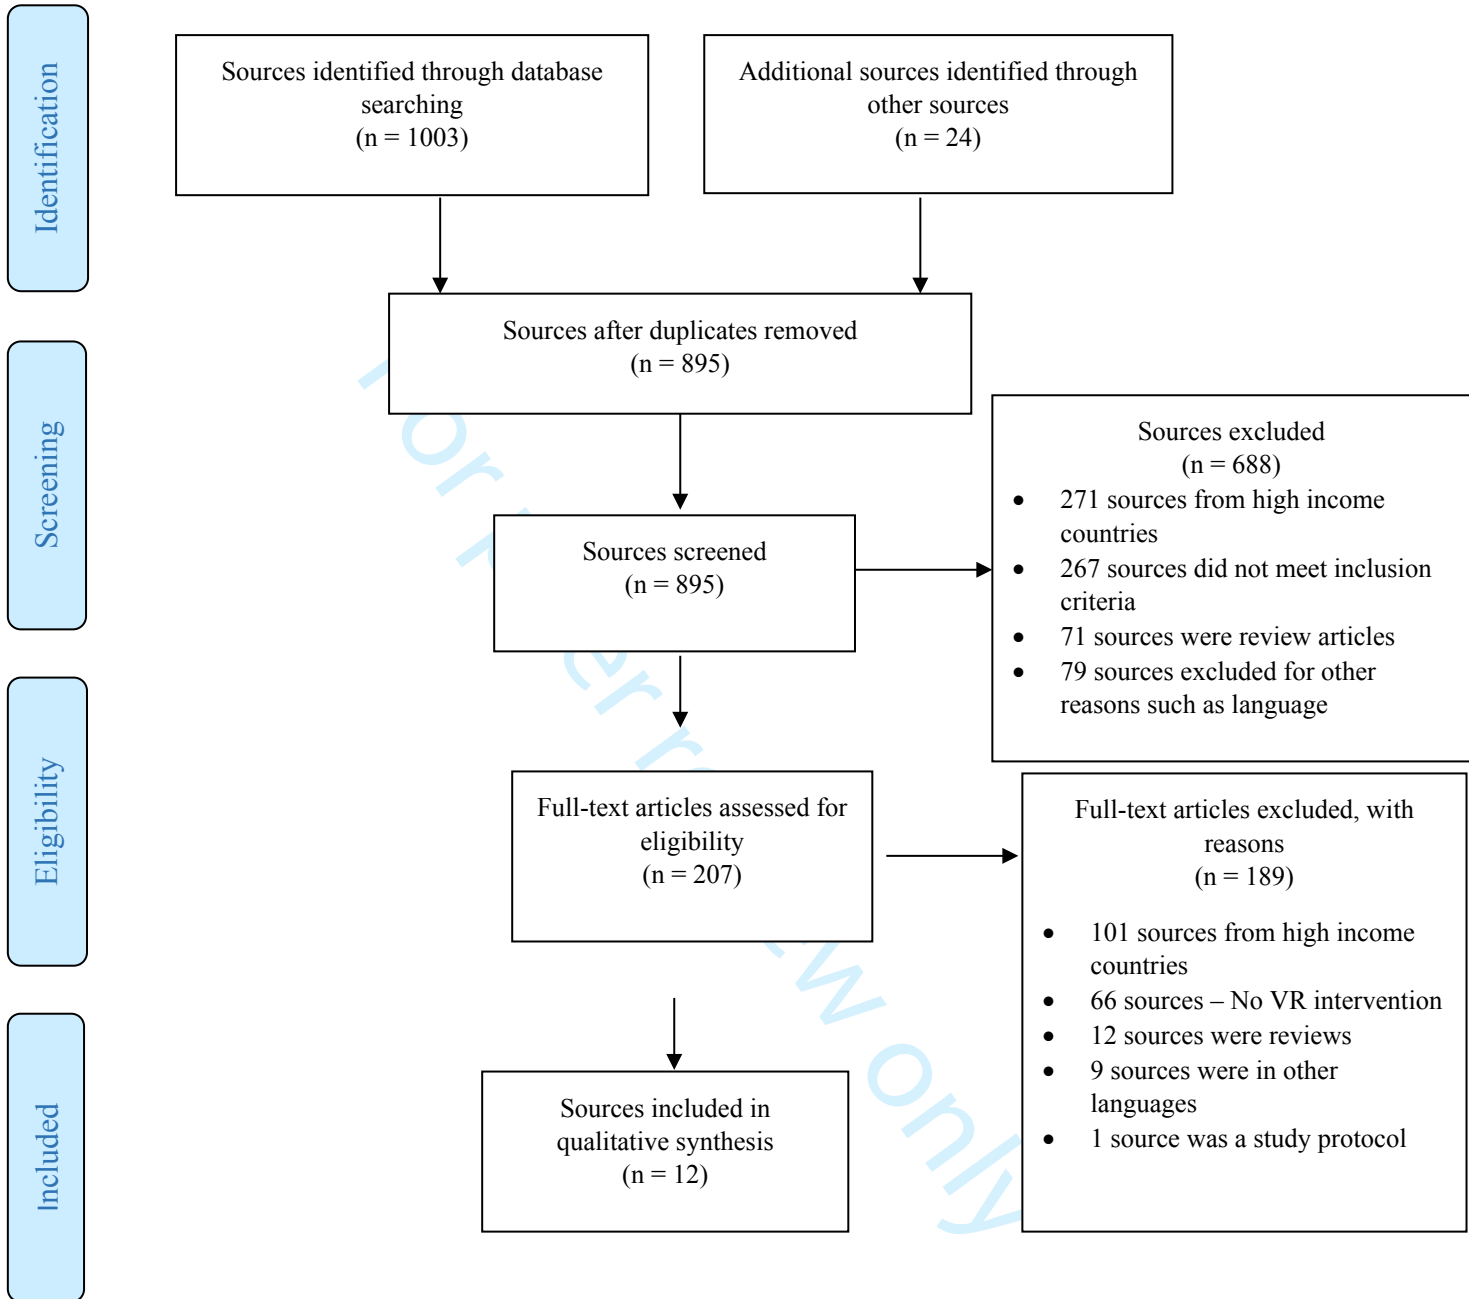

### Extraction of Results

Data were extracted from each of the twelve included sources using a data extraction form that was developed by the first author and independently reviewed by the second and third authors. The template for intervention description and replication (TIDieR) checklist<sup>(24)</sup> was incorporated in the data extraction form. Extracted data covered the following; author (s), year of publication, country of origin, aim/purpose, study population and sample size, methodology, VR intervention type, VR intervention principles, VR intervention strategies, outcomes of the interventions, main conclusions and type of mental health care settings. The extracted data was transferred to spreadsheet and all three authors reviewed the information.

## Results

### Characteristics of Included Sources

A total of 12 sources from four L-UMIC from the continents of Africa, Asia and South America were included. The countries were South Africa – 8 sources, India – 2 sources, Brazil and Kenya – 1 source each. All 12 sources were published between 2011 and 2020. The total number of study participants reported in the included sources was 1581, and only two sources reported the combined attrition of 108 participants. Age of the participants ranged from 18 to 60 years. Four studies<sup>(25)(26)(27)(28)</sup> were conducted in urban settings, one in both urban and rural settings<sup>(29)</sup>, and the rest of the included sources did not report on this aspect. In terms of socio-economic status of the participants, two sources<sup>(26)(28)</sup> reported that participants were from low socio-economic status stratum, whereas the rest of the included sources did not state this component. Diagnoses reported in the sources were: schizophrenia, schizoaffective disorder, anxiety disorder, bipolar type I disorder, intellectual disability, major depression and obsessive-compulsive disorder.

The included sources used the following study designs: qualitative design - 4, quantitative design – 3, mixed methods design – 2, and Delphi Method -1. Two sources did not clearly state the design used. Qualitative designs used included action research, phenomenology, interpretive biography, multiple collaborative research and focus group interviews. Single blinded randomized control and longitudinal descriptive designs were employed in quantitative designs. Table 1 below is a summary of the characteristics of included sources.

Table 1: Characteristics of Included Sources

| Authors & year of publication     | Country & Region      | Study Design                                                                                    | Study Participants/target population                                                                                                                | Sample size                                                                              | Gender               | Age of the study participants/target population | Location      | Socio-economic status of the study participants/target population | Diagnosis of the study participants/target population                       |
|-----------------------------------|-----------------------|-------------------------------------------------------------------------------------------------|-----------------------------------------------------------------------------------------------------------------------------------------------------|------------------------------------------------------------------------------------------|----------------------|-------------------------------------------------|---------------|-------------------------------------------------------------------|-----------------------------------------------------------------------------|
| Adriana D.B. Vizzotto et al. 2016 | Brazil, South America | Randomized controlled, single blind pilot study comparing the OGI method with craft activities. | Patients with Treatment Resistant Schizophrenia                                                                                                     | 30                                                                                       | Male 24, female 5.   | 18 - 55                                         | Urban         | Not stated                                                        | Schizophrenia                                                               |
| Hester van Biljon et al. 2015     | South Africa, Africa  | Action research phenomenology                                                                   | Occupational therapists working in Gauteng's public healthcare, who were interested in vocational rehabilitation. Vocational rehabilitation experts | 127 Occupational Therapists and 39 Vocational Rehabilitation experts                     | Not stated           | Not stated                                      | Not stated    | Not stated                                                        | Not specified                                                               |
| Ikenna D. Ebuenyi et al. 2019     | Kenya, Africa         | A sequential mixed-method design                                                                | Persons with mental/psychosocial disabilities.                                                                                                      | 14 Individual interviews, 30 individuals in FGDs, 72 participated in quantitative study. | Males and females    | Mean age of 40 years                            | Not stated    | Not stated                                                        | Depression, schizophrenia, bipolar mood disorder                            |
| Chitra Khare et al 2020           | India, Asia           | Not specified                                                                                   | Psychiatric outpatients                                                                                                                             | 552                                                                                      | Male 311, female 231 | 18-60                                           | Rural & Urban | Not stated                                                        | schizophrenia, schizoaffective disorder, bipolar disorder, major depression |
| Reema Samuel, K. S. Jacob 2017    | India, Asia           | Narrative paper                                                                                 | Not stated                                                                                                                                          | Not stated                                                                               | Not stated           | Not stated                                      | Not stated    | Not stated                                                        | Not specified                                                               |
| Hester M van Biljon et al 2016    | South Africa, Africa  | A multi-collaborative                                                                           | Occupational therapists working in Gauteng's public healthcare, who                                                                                 | 14 VRTT group, 242 OT clinicians                                                         | Not stated           | Not stated                                      | Not stated    | Not stated                                                        | Not specified                                                               |

|                                                       |                      |                                                       |                                                                                                                                                                                                                                                                      |                                                                     |            |                               |            |                          |                                                                   |
|-------------------------------------------------------|----------------------|-------------------------------------------------------|----------------------------------------------------------------------------------------------------------------------------------------------------------------------------------------------------------------------------------------------------------------------|---------------------------------------------------------------------|------------|-------------------------------|------------|--------------------------|-------------------------------------------------------------------|
|                                                       |                      | action research approach                              | were interested in vocational rehabilitation. Vocational rehabilitation experts                                                                                                                                                                                      | in Gauteng public sector, 26 OT working in Academics. 39 VR experts |            |                               |            |                          |                                                                   |
| Tania Buys 2015                                       | South Africa, Africa | A Delphi technique                                    | Occupational Therapists                                                                                                                                                                                                                                              | 35                                                                  | Not stated | Not stated                    | Not stated | Not stated               | Not specified                                                     |
| Kreshnee Govender et al 2018                          | South Africa, Africa | Quantitative & Qualitative design using survey monkey | Qualified occupational therapists working in the private sector, those specializing in vocational rehabilitation in the private sector; working in health consulting and insurance sectors; occupational therapists involved in medico-legal work and work with RAF. | 180                                                                 | Not stated | Not stated                    | Not stated | Not stated               | Not specified                                                     |
| Occupational Therapy Association of South Africa 2020 | South Africa, Africa | Not stated                                            | Not stated                                                                                                                                                                                                                                                           | Not stated                                                          | Not stated | Not stated                    | Not stated | Not stated               | Injury, illness, impairment or congenital or acquired disability. |
| Madri Engelbrecht et al 2017                          | South Africa, Africa | Longitudinal descriptive design                       | Working age participants with a diagnosis of psychiatric disorder or intellectual disability                                                                                                                                                                         | Group A - 25. Group B - 56.                                         | Not stated | Working age but not specified | Urban      | Low socio-economic group | Psychiatric disability, intellectual disability.                  |
| Lana Van Niekerk et al 2011                           | South Africa, Africa | Focus group interview                                 | Service providers who had initiated SE programmes in the Cape                                                                                                                                                                                                        | 8                                                                   | Not stated | Not stated                    | Urban      | Not stated               | Not specified                                                     |
| Lana Van Niekerk et al 2015                           | South Africa, Africa | longitudinal descriptive design                       | People with mental disabilities receiving SE in the Western Cape Province                                                                                                                                                                                            | Group A 29, Group B 56.                                             | Not stated | Not stated                    | Urban      | Low socio-economic group | Intellectual disability, Psychiatric disability (Schizophrenia,   |

1  
2  
3  
4  
5  
6  
7  
8  
9  
10  
11  
12  
13  
14  
15  
16  
17  
18  
19  
20  
21  
22  
23  
24  
25  
26  
27  
28  
29  
30  
31  
32  
33  
34  
35  
36  
37  
38  
39  
40  
41  
42  
43  
44  
45  
46

|  |  |  |  |  |  |  |  |  |  |                                       |
|--|--|--|--|--|--|--|--|--|--|---------------------------------------|
|  |  |  |  |  |  |  |  |  |  | Schizoaffective disorder, Bipolar I). |
|--|--|--|--|--|--|--|--|--|--|---------------------------------------|

For peer review only

### *Level of evidence of included sources*

Levels of scientific evidence can be reliably used to summarize the quality of literature. There are five levels of scientific evidence.<sup>(30)</sup> Level 1 is the highest and it includes randomized control trials. Levels 2 and 3 include cohort and case control studies respectively, whereas level 4 encompasses non-experimental observational studies, case reports and case series.<sup>(30)</sup> Narrative reviews and expert opinions comprise the lowest level of scientific evidence i.e. level 5. In this study, one source by Vizzotto et al<sup>(25)</sup> is level 1, two sources by Engelbrecht et al<sup>(26)</sup> and van Niekerk et al<sup>(28)</sup> are level 2, and 7 sources<sup>(12,27,31–35)</sup> are level five. Two sources<sup>(29,36)</sup> did not specify methodology used.

## Review Findings

### *Vocational Rehabilitation Intervention Types*

The included sources reported different VR types. Supported employment was the most common VR intervention cited by four sources.<sup>(29)(26)(27)(28)</sup> This is a VR intervention type that promotes the inclusion of persons with disabilities in competitive employment.<sup>(28)</sup> It is based on the assumption that people with the most severe disabilities can be integrated into competitive employment if they receive the right support.<sup>(28)</sup> The ongoing support can be provided by family members of the MHSU, the employer, occupational therapist or a job coach.<sup>(29)(28)(26)</sup>

Two sources<sup>(12)(36)</sup> categorized VR intervention types into six categories that were quite similar. These were: (i) prevention, (ii) screening, (iii) assessment, (iv) intervention, (v) placement, and (vi) follow-up. Prevention includes providing educative services for the prevention of injury at work, to create an awareness of good work practice, as well as avoiding development and/or worsening of a condition. Screening entails a short prescriptive process to filter and refer MHSUs to more specialized occupational therapists or facilities, whereas intervention services are programs aimed at correcting or compensating for ability to work deficits.<sup>(12)(36)</sup> Van Biljon et al<sup>(12)</sup> stated that placement services focus on the return of MHSUs to their own, alternative or new work area in the open labour market. Placement also include placement of MHSUs in sheltered or protected workshops.<sup>(12)</sup> Follow-up is done for MHSUs who used VR services and could be done with employers, referral sources, family members of MHSUs and MHSUs themselves.<sup>(12)</sup>

Case management and Goal Management Training (GMT) methods were also identified as possible VR intervention methods.<sup>(25)(34)</sup> Case management can be utilized as an early intervention approach in VR of MHSUs once there has been an extended period of absence from work or a high rate of absence from work due to illness.<sup>(34)</sup> It involves developing a care plan, reskilling/training to aid in work re-entry, and work visits to liaise with employer to aid in the transition of the MHSU back to work.<sup>(34)</sup> Vizzotto et al<sup>(25)</sup> tested the efficacy of Occupational Goal Intervention Method for the improvement of executive functioning in MHSUs with Treatment Resistant Schizophrenia(TRS). This intervention was delivered over 15 weeks via 30 sessions with each session lasting 90 minutes. Focus of the intervention was on activities of daily living and instrumental activities of daily living including money management and use of transportation. Their study concluded that Occupational Goal Intervention Method appeared to improve social and functional aspects of MHSUs with TRS.

1  
2  
3 Other VR intervention types identified in this review were job seeker programs and related  
4 support, prevocational skills training and support, and social networks.<sup>(35)(31)</sup>  
5

### 6 *Vocational Rehabilitation Intervention Principles* 7

8 Five out of the 12 included sources stated a number of principles applied in VR.<sup>(32)(33)(34)(27)(28)</sup>  
9 Samuel and Jacob<sup>(32)</sup> in their study on the role of occupational therapy in bridging the gap  
10 between symptomatic improvement and functional recovery highlighted the following three  
11 principles; (i) patient and family empowerment, (ii) focus on achieving functional recovery,  
12 and (iii) optimizing the fit between an individual's abilities and the environmental demands.  
13 Buys<sup>(33)</sup> identified five principles in her study on professional competencies in VR, namely;  
14 client centered, objectivity, adaptability, professionalism and respect. Planning with the client,  
15 client advocacy and on-going individualized support are the principles specifically identified  
16 for case management and supported employment.<sup>(34)(28)</sup> Van Niekerk et al<sup>(27)</sup> further reiterated  
17 the need to support MHSU goals and to empower them with choices and information, and they  
18 highlighted that support should be 'no more than needed and no less than necessary'.  
19  
20  
21

### 22 *Vocational Rehabilitation Intervention Strategies* 23

24 All 12 included sources presented various VR intervention strategies. Khare et al<sup>(29)</sup> identified  
25 the following strategies; teaching illness self-management skills, systematic involvement of  
26 families and social networks to help with job finding, collaboration on mental illness  
27 management, and facilitating work in family business. Van Niekerk et al<sup>(27)</sup> and Engelbrecht  
28 et al<sup>(26)</sup> reported similar VR intervention strategies in their studies. These were job analysis and  
29 matching, job finding, job coaching, trial placement, simulated work, work in protective  
30 factories and sheltered workshops. Job analysis and matching involves evaluation of  
31 employment potential and goodness of job fit. Job advocacy at the job site with employers and  
32 co-workers was a strategy utilized in supported employment. Work visits were done to observe  
33 real work, to discuss reasonable accommodation and to assist with performance appraisals.  
34 Engelbrecht et al<sup>(26)</sup> further identified personal life skills training as an essential component of  
35 VR strategy. The personal life skills deemed essential in VR included money handling,  
36 grooming, use of transportation, time management and communication.  
37

38 The Occupational Therapy Association of South Africa (OTASA)<sup>(36)</sup> position paper on VR  
39 stated a number of VR strategies that are applicable in various settings including mental  
40 healthcare settings. These strategies include sheltered workshops, entrepreneurship and self-  
41 employment initiatives, vocational guidance and counseling, as well as work adaptation. In  
42 addition, Buys<sup>(33)</sup> identified the following VR strategies, job description review, work  
43 hardening, work conditioning, stress management and job seeking skills training.  
44  
45  
46  
47  
48

### 49 *Vocational Rehabilitation Intervention Outcomes* 50

51 VR intervention outcomes were reported for Supported Employment and Occupational Goal  
52 Intervention Method. Participants who engaged in supported employment earned more and  
53 worked more hours per month than those who had had prevocational training.<sup>(27)</sup> More so,  
54 supported employed allowed MHSUs to integrate into mainstream society, provided income  
55 and arena for social and personal development including improved self-esteem. Improved  
56 income lessens the economic burden for government. Reduction in the consumption of mental  
57 health services was reported for MHSUs who entered employment.<sup>(26)</sup> A study by Adriana et  
58  
59  
60



1  
2  
3 al<sup>(25)</sup> showed that Occupational Goal Intervention Method appeared to improve social and  
4 functional aspects of patients with Treatment Resistant Schizophrenia.  
5

### 6 *Summary of conclusions and recommendations*

7  
8 Overall the included sources emphasized the need for contextually relevant vocational  
9 rehabilitation practice and advocated for the adoption of supported employment VR  
10 intervention for MHSUs. Van Biljon et al<sup>(35)</sup> concluded in their study by stating that having a  
11 comprehensive and contextually relevant tool that effectively indicate what VR services look  
12 like will be helpful to occupational therapists offering VR services in both public healthcare  
13 and in private practices. Khare et al<sup>(29)</sup> suggested in their conclusion that attention should be  
14 paid to adapting models of VR to the cultural context of developing countries to improve the  
15 employment outcomes of persons with serious mental illness. Buys<sup>(33)</sup> asserted the need for the  
16 occupational therapy profession to ensure that it provides competent, professional and  
17 contextually relevant VR services to clients which enables them to fulfil their roles as  
18 independent citizens. Similarly, the OTASA<sup>(36)</sup> position paper on VR concluded that the type  
19 of VR service that occupational therapists in South Africa offer should be dictated by the  
20 vocational needs and aspirations, social structures and contextual realities of MHSUs.  
21  
22  
23  
24

25 Three of the included sources concluded by advocating for supported employment as a model  
26 of choice in VR<sup>(26)(27)(28)</sup>. Engelbrecht et al<sup>(26)</sup> concluded that supported employment is cost  
27 effective and will combat unemployment, work towards poverty reduction and redress  
28 inequality for people with mental disabilities, hence it is a viable strategy for return to work  
29 endeavors. In addition to proposing supported employment as a model of choice to drive the  
30 process of economic empowerment for persons facing disabling conditions, van Niekerk et  
31 al<sup>(27)</sup> recommended a holistic approach to supported employment because it has components  
32 such as placement in suitable work and reasonable accommodation that do not necessarily  
33 follow a linear process. Van Niekerk<sup>(28)</sup> recommended the need for providers of supported  
34 employment to modify approaches in order to meet contextual realities.  
35  
36  
37

## 38 **Discussion**

39  
40 This study set out to scope the literature on VR of MHSUs with chronic mental illness, within  
41 the occupational therapy scope of practice, in L-UMICs. The study further identified the  
42 different types, principles and strategies of institution-based VR interventions for MHSUs.  
43 Overall, the majority of included sources were from South Africa with only one source from  
44 Kenya completing the representation from African continent. Only two sources from India and  
45 one from Brazil represented the Asian and South American continents respectively. The low  
46 number of sources possibly confirm limited research in the field of VR for MHSUs with  
47 chronic mental illness in L-UMIC, which could be attributed to a couple of factors. There is a  
48 high patient-therapist ratio in the field of mental health in L-UMICs, thus occupational  
49 therapists do not have sufficient time and skills to document and publish their work. Another  
50 possible contributing factor to low number of sources could be the limited resources such as  
51 funding, publishing journals and tertiary institutions providing occupational therapy training.  
52 As a result, occupational therapists cannot afford the cost of publishing in journals from high  
53 income countries and they lack academic support to help with their academic writing skills and  
54 ethical clearance for their research.  
55  
56  
57  
58  
59  
60

1  
2  
3 The main VR types identified in African and Asian sources were supported employment, case  
4 management, prevocational and vocational skills training. Goal Management Training  
5 Method<sup>(25)</sup> was the only intervention type identified from the one included source from South  
6 American continent. Using the categorization of VR types suggested by Van Biljon et al<sup>(12)</sup>,  
7 supported employment fits in two categories, intervention and placement. Prevocational and  
8 vocational skills training fall under traditional VR intervention, which is a stepwise path that  
9 focuses on assessment and job matching prior to job search.<sup>(37)</sup> The included sources did not  
10 specify institution-based VR interventions. One possible reason for this observation could be  
11 due to the current set-up of occupational therapy practice in L-UMIC where occupational  
12 therapists tend to be institution based regardless of the VR intervention type that they provide.  
13 Also, institution based VR in L-UMIC lack human and capital resources such as therapists and  
14 transport needed to move beyond the institutions. Generally, as alluded above, there is dearth  
15 of documented evidence supporting occupational therapists involvement in VR.<sup>(38)</sup>  
16  
17  
18  
19

20 Vocational rehabilitation intervention principles identified in this review focused on client  
21 centredness, achieving functional recovery, as well as advocating for client and family support.  
22 These principles are well enshrined within the general occupational therapy intervention  
23 principles. Client centredness is a key element of occupational therapy practice that demands  
24 for the formation of partnerships with MHSUs, which allows for the exploration,  
25 understanding, and promotion of engagement in their chosen or expected occupations  
26 including work<sup>(39)</sup>. Applying the principle of client centredness in VR intervention five rules  
27 should be considered based on a framework suggested by Gretschel and Galvaan.<sup>(39)</sup> MHSUs  
28 should be considered holistically, they should be viewed as experts of their own occupational  
29 engagement, their values and goals must be respected, therapist-person partnerships should be  
30 facilitative and not directive, and contextual congruence must be inherent in the VR  
31 interventions designed.<sup>(39)</sup> Supportive relationship is another VR principle that is integral to the  
32 success of VR interventions. Occupational therapists, employers, coworkers and family  
33 members provide hope, empathy and encouragement, all resulting in enhanced confidence at  
34 work, increased work-related skills and greater ability of MHSUs to fit within a particular  
35 work/employment situation.<sup>(40)</sup> Also, given the reality that mental disability tends to be  
36 episodic and fluctuates over time, and due to limited understanding of mental illness in L-  
37 UMICs, it is imperative that VR intervention is structured to offer on-going support in and  
38 beyond institution boundaries.<sup>(11)</sup>  
39  
40  
41  
42  
43

44 Regarding VR intervention strategies, the included sources clearly focused on simultaneously  
45 placing MHSUs in competitive work and providing support through networks and negotiating  
46 with employer and managing symptoms. This highlights a shift from the traditional VR  
47 strategies which focus on train-first-then-place. However, this strategy may pose a challenge  
48 in L-UMICs where unemployment rates are high resulting in MHSUs competing for  
49 employment with the mainstream community. Self-employment initiatives is therefore a  
50 realistic VR intervention strategy.<sup>(38)</sup> Occupational therapists are sufficiently skilled to  
51 facilitate self-employment, and can contribute towards alleviating unemployment among  
52 MHSUs with chronic mental illness by identifying potential and encouraging entrepreneurship  
53 and self-employment opportunities.<sup>(38)</sup> Swart and Buys<sup>(11)</sup> contend that in addition to the  
54 various VR intervention strategies that occupational therapists utilize, traditional psychosocial  
55 intervention such as stress management, conflict management and relaxation therapy should  
56 be considered depending on client needs.  
57  
58  
59  
60

### Implication for Research

The findings of the scoping review provide the authors with thematic areas to consider when developing the semi-structured interview guide that will be utilized to explore factors to be considered for VR intervention in the Namibian context. The proposed thematic areas are; (i) VR interventions applicable to Namibia context, (ii) VR principles to be applied, (iii) VR intervention strategies, (iv) VR stakeholders to be engaged in Namibia including their roles, and (v) general recommendations for the implementation of VR in Namibia for MHSUs with chronic mental illness.

### Implication for Practice

In terms of occupational therapy practice in VR, the findings of this review highlight the need to shift from the current practice to *place and train* models in L-UMIC. Institution based VR should take shorter time compared to the traditional VR approach and rather focus on identifying potential areas for placement and support in the natural work contexts for MHSUs. In the context of L-UMICs where unemployment rates are high, VR intervention may need to focus on strategies that support self-employment initiatives. Client centeredness is a key principle in planning for VR interventions and ensuring that intended VR outcomes are achieved. There is a need for occupational therapists to have insight into and adapt vocational rehabilitation intervention strategies to the demographic and socio-economic context of the L-UMIC in which they practice.<sup>(38)</sup> Occupational therapists and other VR stakeholders should provide the right level of individual support to MHSUs in VR and be able to adapt this support according to the needs of the client.

### Strengths and Limitations

#### Strengths

- The study followed a scoping review protocol<sup>(1)</sup> that was peer reviewed and published in BMJ Open on 14 July 2021.
- Pre-scheduled weekly meetings among the three authors were used to promote momentum and discussions throughout the project.
- The authors used human and other library resources from two different universities, University of Namibia and Stellenbosch University.

#### Limitations

- Sources published in non-English languages were excluded from this review, therefore the authors concede that sources from L-UMIC in languages such as Spanish could have been missed.
- Due to the dearth of publications from L-UMIC the evidence presented in this article cannot be seen to represent VR for MHSUs within occupational therapy scope globally.

### Conclusion

This review mapped the current evidence in VR for MHSUs with chronic mental illness in L-UMICs. Review findings indicate the need for institution based occupational therapists in L-UMICs to shift from a traditional vocational rehabilitation approach to interventions that do not cease upon discharge but include place-train-and-support approaches. VR interventions should extend their focus on supporting MHSUs in their natural work settings or potential work

1  
2  
3 settings. Such intervention should include factors such as getting to and from work, job seeking  
4 skills, upskilling within the larger labour market, and it should include placement  
5 considerations such as self-employment and unpaid work. The authors recommend further  
6 studies on VR interventions and outcomes for MHSUs in low resourced communities focusing  
7 on practical and unique realities experienced by such communities. More so, it is imperative  
8 that researchers in the field of occupational therapy, mental health and VR strive for levels 1  
9 and 2 of scientific evidence to inform practice.  
10  
11

### 12 **Author Contributions**

13  
14 Three authors were involved in conceptualizing, drafting and editing this scoping review. The  
15 first author, Munyaradzi Chimara, conducted this scoping review as part of his doctoral studies.  
16 Second and third authors, Professor Lana van Niekerk and Dr Hester Maria van Biljon  
17 respectively, were involved as academic supervisors in all the stages followed in this scoping  
18 review study.  
19  
20

### 21 **Funding**

22  
23 At the time of submission, no funding was received from any agency or organisation for  
24 supporting this research.  
25

### 26 **Competing interest statement**

27  
28 The authors hereby declare that there is no conflict of interest from the publication of this paper.  
29

### 30 **References**

- 31  
32  
33 1. Chimara M, Van Niekerk L, Van Biljon HM. Vocational rehabilitation for mental health  
34 service users with chronic mental illness in low-income to upper-middle-income  
35 countries: a scoping review protocol. *BMJ Open*. 2021;1–6.  
36  
37 2. Patel V. Mental health in low- and middle-income countries. *Br Med Bull*. 2007;81–  
38 82(1):81–96.  
39  
40 3. Chibanda D. The future of psychiatry in Africa—thinking outside the box. *The Lancet*  
41 *Psychiatry*. 2017;4(10):741–2.  
42  
43 4. World Health Organisation. *Mental health atlas 2017*. Geneva; 2018.  
44  
45 5. Nguyen T, Holton S, Tran T, Fisher J. Informal mental health interventions for people  
46 with severe mental illness in low and lower middle-income countries: A systematic  
47 review of effectiveness. *Int J Soc Psychiatry*. 2019;65(3):194–206.  
48  
49 6. World Bank. World Bank Country and Lending Groups [Internet]. World Bank Group.  
50 2021 [cited 2021 Sep 21]. Available from:  
51 [https://datahelpdesk.worldbank.org/knowledgebase/articles/906519-world-bank-](https://datahelpdesk.worldbank.org/knowledgebase/articles/906519-world-bank-country-and-lending-groups)  
52 [country-and-lending-groups](https://datahelpdesk.worldbank.org/knowledgebase/articles/906519-world-bank-country-and-lending-groups)  
53  
54 7. Bachrach, Leona L. Defining chronic mental illness.pdf. *Am Psychiatry Assoc*.  
55 1988;39(4):383–8.  
56  
57 8. American Psychiatric Association. *Diagnostic and statistical manual of mental*  
58 *disorders*. Fifth. Washington, London; 2013.  
59  
60 9. Swart L, Buys T. Vocational Rehabilitation in Psychiatry and Mental Health. In: Crouch

- 1  
2  
3 R, Alers V, editors. Occupational Therapy in Psychiatry and Mental Health. Fifth.  
4 Chichester: Wiley Backwell; 2014. p. 175–93.  
5
- 6 10. Ross J. Occupational Therapy and Vocational Rehabilitation. West Sussex: John Wiley  
7 & Sons; 2007.  
8
- 9 11. Swart L, Buys T. Vocational Rehabilitation in Psychiatry and Mental Health. In:  
10 Occupational Therapy in Psychiatry and Mental Health. 2014. p. 175–93.  
11
- 12 12. van Biljon HM, Casteljen D, J du Toit SH, Soulsby L. Opinions of occupational  
13 therapists on the positioning of vocational rehabilitation services in Gauteng Public  
14 Healthcare. South African J Occup Ther. 2016;46(1):45–52.  
15
- 16 13. Suijkerbuijk YB, Schaafsma FG, van Mechelen JC, Ojajärvi A, Corbière M, Anema JR.  
17 Interventions for obtaining and maintaining employment in adults with severe mental  
18 illness, a network meta-analysis. Cochrane Database Syst Rev [Internet]. 2017;(9).  
19 Available from: <http://dx.doi.org/10.1002/14651858.CD011867.pub2>  
20
- 21 14. Clubhouse International. How clubhouses work [Internet]. Clubhouse International.  
22 2021. Available from: <https://clubhouse-intl.org/resources/how-clubhouses-work/>  
23
- 24 15. Lloyd C. Vocational rehabilitation and mental health [Internet]. Vol. 369, Journal of  
25 Petrology. Wiley Backwell; 2010. 1689–1699 p. Available from:  
26 <http://dx.doi.org/10.1016/j.jsames.2011.03.003>  
27 <https://doi.org/10.1016/j.gr.2017.08.001>  
28 <http://dx.doi.org/10.1016/j.precamres.2014.12.018>  
29 <http://dx.doi.org/10.1016/j.precamres.2011.08.005>  
30 <http://dx.doi.org/10.1080/00206814.2014.902757>  
31 <http://dx.doi.org/10.1016/j.precamres.2011.08.005>  
32
- 33 16. Arksey H, Malley LO, Arksey H, Malley LO. Scoping studies: towards a  
34 methodological framework Scoping Studies: Towards a Methodological Framework.  
35 2007;5579.
- 36 17. Arksey H, O'Malley L. Scoping studies: Towards a methodological framework. Int J  
37 Soc Res Methodol Theory Pract. 2005;8(1):19–32.  
38
- 39 18. Levac D, Colquhoun H, O'Brien KK, Brien KKO. Scoping studies: advancing the  
40 methodology. Implement Sci. 2010;1–18.  
41
- 42 19. Colquhoun HL, Levac D, O'Brien KK, Straus S, Tricco AC, Perrier L, et al. Scoping  
43 reviews: Time for clarity in definition, methods, and reporting. J Clin Epidemiol  
44 [Internet]. 2014;67(12):1291–4. Available from:  
45 <http://dx.doi.org/10.1016/j.jclinepi.2014.03.013>  
46
- 47 20. Tricco AC, Lillie E, Zarin W, O'Brien KK, Colquhoun H, Levac D, et al. PRISMA  
48 Extension for Scoping Reviews (PRISMA-ScR): Checklist and Explanation. Ann Intern  
49 Med [Internet]. 2018; Available from: <http://annals.org/article.aspx?doi=10.7326/M18-0850>  
50
- 51 21. Institute TJB. The Joanna Briggs Institute Reviewers' Manual 2015 Methodology for  
52 JBI Scoping Reviews [Internet]. The Joanna Briggs Institute; 2015. Available from:  
53 [www.joanabriggs.org](http://www.joanabriggs.org)  
54
- 55 22. Mendeley. Mendeley Reference Manager. Elsevier; 2020.  
56
- 57 23. Mourad O, Hossam H, Zbys F, Ahmed E. Rayyan Intelligent Systematic Review. 2020.  
58  
59  
60

- 1
  - 2
  - 3
  - 4
  - 5
  - 6
  - 7
  - 8
  - 9
  - 10
  - 11
  - 12
  - 13
  - 14
  - 15
  - 16
  - 17
  - 18
  - 19
  - 20
  - 21
  - 22
  - 23
  - 24
  - 25
  - 26
  - 27
  - 28
  - 29
  - 30
  - 31
  - 32
  - 33
  - 34
  - 35
  - 36
  - 37
  - 38
  - 39
  - 40
  - 41
  - 42
  - 43
  - 44
  - 45
  - 46
  - 47
  - 48
  - 49
  - 50
  - 51
  - 52
  - 53
  - 54
  - 55
  - 56
  - 57
  - 58
  - 59
  - 60
24. Hoffmann TC, Glasziou PP, Boutron I, Milne R, Perera R, Moher D, et al. Better reporting of interventions: Template for intervention description and replication (TIDieR) checklist and guide. *BMJ* [Internet]. 2014;348(March):1–12. Available from: <http://dx.doi.org/doi:10.1136/bmj.g1687>
25. Vizzotto ADB, Celestino DL, Buchain PC, Oliveira AM, Oliveira GMR, Di Sarno ES, et al. A pilot randomized controlled trial of the Occupational Goal Intervention method for the improvement of executive functioning in patients with treatment-resistant schizophrenia. *Psychiatry Res* [Internet]. 2016;245(April):148–56. Available from: <http://dx.doi.org/10.1016/j.psychres.2016.05.011>
26. Engelbrecht M, Uct OT, Ot B, Coetzee Z, Ot ND, Uct OT, et al. Supported Employment for people with mental disabilities in South Africa: cost calculation of service utilisation. 2017;47(2):11–6.
27. Van Niekerk L, Coetzee Z, Engelbrecht M, Hajwani Z, Landman S, Motimele M, et al. Supported employment: Recommendations for successful implementation in South Africa. *Support Employ Recomm Success Implement South Africa*. 2011;41(3):85–90.
28. Van Niekerk L, Coetzee Z, Engelbrecht M, Hajwani Z, Terreblanche S. Time utilisation trends of supported employment services by persons with mental disability in South Africa. *Work*. 2015;52(4):825–33.
29. Khare C, Mueser KT, Fulford D, Watve VG, Karandikar NJ, Khare S, et al. Employment functioning in people with severe mental illnesses living in urban vs. rural areas in India. *Soc Psychiatry Psychiatr Epidemiol* [Internet]. 2020;55(12):1593–606. Available from: <https://www.scopus.com/inward/record.uri?eid=2-s2.0-85086778582&doi=10.1007%2Fs00127-020-01901-0&partnerID=40&md5=6069171aa788c101228e8e27298643f8>
30. Bowen DM., Forrest JL. Translating Research for Evidence-Based Practice.: EBSCOhost. 2017;(February). Available from: <https://web-b-ebSCOhost-com.lopes.idm.oclc.org/ehost/pdfviewer/pdfviewer?vid=1&sid=f204616b-9cae-42e5-a8c2-7175df7b56ad%40sessionmgr101>
31. Ebuenyi I. Inclusive employment: understanding the barriers to and facilitators of employment for persons with mental disability in East Africa [Internet]. 2019. Available from: [https://research.vu.nl/files/87463718/complete\\_dissertation.pdf](https://research.vu.nl/files/87463718/complete_dissertation.pdf)
32. Samuel R, Jacob KS. Occupational therapy in India: Focus on functional recovery and need for empowerment. *Indian J Psychiatry*. 2018;59(4):2017–8.
33. Buys T. Professional competencies in vocational rehabilitation: Results of a Delphi study. *South African J Occup Ther*. 2015;45(3):48–54.
34. Govender K, Christopher C, Lingah T. The role of the occupational therapist in case management in South Africa. *South African J Occup Ther*. 2018;48(2):12–9.
35. Biljon H Van, Ufs BOT, Ufs MOT, Pret MOT. An Action Research Approach to Profile an Occupational Therapy VR SERVICE IN PUBLIC HEALTHCARE. 2015;45(3):40–7.
36. OTASA. Position Statement on Vocational Rehabilitation. *South African J Occup Ther*. 2017;47(3):63–4.
37. Vukadin M, Schaafsma FG, Vlaar SJ, van Busschbach JT, van de Ven PM, Michon

- 1  
2  
3 HWC, et al. Work Motivation and Employment Outcomes in People with Severe Mental  
4 Illness. *J Occup Rehabil* [Internet]. 2019;29(4):803–9. Available from:  
5 [https://www.scopus.com/inward/record.uri?eid=2-s2.0-](https://www.scopus.com/inward/record.uri?eid=2-s2.0-85066785183&doi=10.1007%2Fs10926-019-09839-0&partnerID=40&md5=4914cf2e4cb7005000d27385ac9c8f71)  
6 [85066785183&doi=10.1007%2Fs10926-019-09839-](https://www.scopus.com/inward/record.uri?eid=2-s2.0-85066785183&doi=10.1007%2Fs10926-019-09839-0&partnerID=40&md5=4914cf2e4cb7005000d27385ac9c8f71)  
7 [0&partnerID=40&md5=4914cf2e4cb7005000d27385ac9c8f71](https://www.scopus.com/inward/record.uri?eid=2-s2.0-85066785183&doi=10.1007%2Fs10926-019-09839-0&partnerID=40&md5=4914cf2e4cb7005000d27385ac9c8f71)  
8  
9  
10 38. Monareng LL, Franzsen D, van Biljon H. A survey of occupational therapists'  
11 involvement in facilitating self-employment for people with disabilities. *South African*  
12 *J Occup Ther*. 2018;48(3):52–7.  
13  
14 39. Gretschel P, Galvaan R. Using a client-centred approach in occupational therapy. In:  
15 Dsouza SA, Gailvaan R, Ramugondo EL, editors. *Concepts in Occupational Therapy*  
16 *Understanding Southern Perspectives*. First. Manipal: Manipal University Press; 2017.  
17 p. 237–47.  
18  
19 40. Dunn EC, Wewiorski NJ, Rogers ES. A qualitative investigation of individual and  
20 contextual factors associated with vocational recovery among people with serious  
21 mental illness. *Am J Orthopsychiatry*. 2010;80(2).  
22  
23  
24  
25  
26  
27  
28  
29  
30  
31  
32  
33  
34  
35  
36  
37  
38  
39  
40  
41  
42  
43  
44  
45  
46  
47  
48  
49  
50  
51  
52  
53  
54  
55  
56  
57  
58  
59  
60

## Preferred Reporting Items for Systematic reviews and Meta-Analyses extension for Scoping Reviews (PRISMA-ScR) Checklist

| SECTION                                               | ITEM | PRISMA-ScR CHECKLIST ITEM                                                                                                                                                                                                                                                                                  | REPORTED ON PAGE # |
|-------------------------------------------------------|------|------------------------------------------------------------------------------------------------------------------------------------------------------------------------------------------------------------------------------------------------------------------------------------------------------------|--------------------|
| <b>TITLE</b>                                          |      |                                                                                                                                                                                                                                                                                                            |                    |
| Title                                                 | 1    | Identify the report as a scoping review.                                                                                                                                                                                                                                                                   |                    |
| <b>ABSTRACT</b>                                       |      |                                                                                                                                                                                                                                                                                                            |                    |
| Structured summary                                    | 2    | Provide a structured summary that includes (as applicable): background, objectives, eligibility criteria, sources of evidence, charting methods, results, and conclusions that relate to the review questions and objectives.                                                                              |                    |
| <b>INTRODUCTION</b>                                   |      |                                                                                                                                                                                                                                                                                                            |                    |
| Rationale                                             | 3    | Describe the rationale for the review in the context of what is already known. Explain why the review questions/objectives lend themselves to a scoping review approach.                                                                                                                                   |                    |
| Objectives                                            | 4    | Provide an explicit statement of the questions and objectives being addressed with reference to their key elements (e.g., population or participants, concepts, and context) or other relevant key elements used to conceptualize the review questions and/or objectives.                                  |                    |
| <b>METHODS</b>                                        |      |                                                                                                                                                                                                                                                                                                            |                    |
| Protocol and registration                             | 5    | Indicate whether a review protocol exists; state if and where it can be accessed (e.g., a Web address); and if available, provide registration information, including the registration number.                                                                                                             |                    |
| Eligibility criteria                                  | 6    | Specify characteristics of the sources of evidence used as eligibility criteria (e.g., years considered, language, and publication status), and provide a rationale.                                                                                                                                       |                    |
| Information sources*                                  | 7    | Describe all information sources in the search (e.g., databases with dates of coverage and contact with authors to identify additional sources), as well as the date the most recent search was executed.                                                                                                  |                    |
| Search                                                | 8    | Present the full electronic search strategy for at least 1 database, including any limits used, such that it could be repeated.                                                                                                                                                                            |                    |
| Selection of sources of evidence†                     | 9    | State the process for selecting sources of evidence (i.e., screening and eligibility) included in the scoping review.                                                                                                                                                                                      |                    |
| Data charting process‡                                | 10   | Describe the methods of charting data from the included sources of evidence (e.g., calibrated forms or forms that have been tested by the team before their use, and whether data charting was done independently or in duplicate) and any processes for obtaining and confirming data from investigators. |                    |
| Data items                                            | 11   | List and define all variables for which data were sought and any assumptions and simplifications made.                                                                                                                                                                                                     |                    |
| Critical appraisal of individual sources of evidence§ | 12   | If done, provide a rationale for conducting a critical appraisal of included sources of evidence; describe the methods used and how this information was used in any data synthesis (if appropriate).                                                                                                      |                    |
| Synthesis of results                                  | 13   | Describe the methods of handling and summarizing the data that were charted.                                                                                                                                                                                                                               |                    |

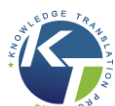



| SECTION                                       | ITEM | PRISMA-ScR CHECKLIST ITEM                                                                                                                                                                       | REPORTED ON PAGE # |
|-----------------------------------------------|------|-------------------------------------------------------------------------------------------------------------------------------------------------------------------------------------------------|--------------------|
| <b>RESULTS</b>                                |      |                                                                                                                                                                                                 |                    |
| Selection of sources of evidence              | 14   | Give numbers of sources of evidence screened, assessed for eligibility, and included in the review, with reasons for exclusions at each stage, ideally using a flow diagram.                    |                    |
| Characteristics of sources of evidence        | 15   | For each source of evidence, present characteristics for which data were charted and provide the citations.                                                                                     |                    |
| Critical appraisal within sources of evidence | 16   | If done, present data on critical appraisal of included sources of evidence (see item 12).                                                                                                      |                    |
| Results of individual sources of evidence     | 17   | For each included source of evidence, present the relevant data that were charted that relate to the review questions and objectives.                                                           |                    |
| Synthesis of results                          | 18   | Summarize and/or present the charting results as they relate to the review questions and objectives.                                                                                            |                    |
| <b>DISCUSSION</b>                             |      |                                                                                                                                                                                                 |                    |
| Summary of evidence                           | 19   | Summarize the main results (including an overview of concepts, themes, and types of evidence available), link to the review questions and objectives, and consider the relevance to key groups. |                    |
| Limitations                                   | 20   | Discuss the limitations of the scoping review process.                                                                                                                                          |                    |
| Conclusions                                   | 21   | Provide a general interpretation of the results with respect to the review questions and objectives, as well as potential implications and/or next steps.                                       |                    |
| <b>FUNDING</b>                                |      |                                                                                                                                                                                                 |                    |
| Funding                                       | 22   | Describe sources of funding for the included sources of evidence, as well as sources of funding for the scoping review. Describe the role of the funders of the scoping review.                 |                    |

JBI = Joanna Briggs Institute; PRISMA-ScR = Preferred Reporting Items for Systematic reviews and Meta-Analyses extension for Scoping Reviews.

\* Where *sources of evidence* (see second footnote) are compiled from, such as bibliographic databases, social media platforms, and Web sites.

† A more inclusive/heterogeneous term used to account for the different types of evidence or data sources (e.g., quantitative and/or qualitative research, expert opinion, and policy documents) that may be eligible in a scoping review as opposed to only studies. This is not to be confused with *information sources* (see first footnote).

‡ The frameworks by Arksey and O'Malley (6) and Levac and colleagues (7) and the JBI guidance (4, 5) refer to the process of data extraction in a scoping review as data charting.

§ The process of systematically examining research evidence to assess its validity, results, and relevance before using it to inform a decision. This term is used for items 12 and 19 instead of "risk of bias" (which is more applicable to systematic reviews of interventions) to include and acknowledge the various sources of evidence that may be used in a scoping review (e.g., quantitative and/or qualitative research, expert opinion, and policy document).

From: Tricco AC, Lillie E, Zarin W, O'Brien KK, Colquhoun H, Levac D, et al. PRISMA Extension for Scoping Reviews (PRISMA-ScR): Checklist and Explanation. *Ann Intern Med.* 2018;169:467–473. doi: [10.7326/M18-0850](https://doi.org/10.7326/M18-0850).

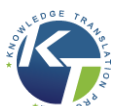

## Summary of Findings

| Authors & year of publication     | Title                                                                                                                                                                            | Aim of Study                                                                                                                                                                        | Type of Mental Healthcare Institution                                                                                                    | VR Intervention Type(s)                                                                                     | Duration of Intervention                      | VR Intervention Principles | VR Intervention Strategies                                                                                                                                                                                                                                                                       | VR Intervention outcomes                                                                                                                                                                                                                                                                                                                                                                                                                                                                                                                                                                   | Main Conclusion                                                                                                                                                                                                                                                                                                                                                                                                                            |
|-----------------------------------|----------------------------------------------------------------------------------------------------------------------------------------------------------------------------------|-------------------------------------------------------------------------------------------------------------------------------------------------------------------------------------|------------------------------------------------------------------------------------------------------------------------------------------|-------------------------------------------------------------------------------------------------------------|-----------------------------------------------|----------------------------|--------------------------------------------------------------------------------------------------------------------------------------------------------------------------------------------------------------------------------------------------------------------------------------------------|--------------------------------------------------------------------------------------------------------------------------------------------------------------------------------------------------------------------------------------------------------------------------------------------------------------------------------------------------------------------------------------------------------------------------------------------------------------------------------------------------------------------------------------------------------------------------------------------|--------------------------------------------------------------------------------------------------------------------------------------------------------------------------------------------------------------------------------------------------------------------------------------------------------------------------------------------------------------------------------------------------------------------------------------------|
| Adriana D.B. Vizzotto et al. 2016 | A pilot randomized controlled trial of the Occupational Goal Intervention method for the improvement of executive functioning in patients with treatment-resistant schizophrenia | To test the efficacy of the Occupational Goal Intervention (OGI) method for the improvement of EF in patients with TRS.                                                             | Schizophrenia Research Program of the institute of psychiatry - University of Sao Paulo School of Medicine. (Sao Paulo General Hospital) | Goal Management Training (GMT) method                                                                       | 15 weeks, 30 sessions, 90 minutes per session | Not stated                 | In the OGI group, the initial sessions targeted ADL (personal hygiene), followed by IADL (housework, money management, and use of transportation), social activities, and leisure. Each patient was given four homework assignments in order to practice the daily living tasks they had learned | Outcome measures correlate significantly with the total PANSS score, showing that the degree of severity of schizophrenia is inversely related to the improvement of EF (BADs), Functional Outcome (DAFS-BR) and patient autonomy (ILSS-BR). With regards to effect analysis, over the course of the study period, there were no major changes regarding the clinical stability of the patients. Results suggest that the use of the OGI method is an effective strategy that can benefit patients with TRS. As expected, outcome measures were shown to be significantly intercorrelated. | "The OGI method has been shown to be reliable and effective for patients with TRS. In addition, the method appears to improve social and functional aspects of patients with TRS."                                                                                                                                                                                                                                                         |
| Hester van Biljon et al. 2015     | An Action Research Approach to Profile an Occupational Therapy Vocational Rehabilitation Service in Public Healthcare                                                            | The aim of the project was to develop a tool that would allow occupational therapists doing vocational rehabilitation, to systematically and comprehensively profile their services | Not stated                                                                                                                               | Return to work program. Job-seeker programs and related support. Prevocational skills training and support. | Not stated                                    | Not stated                 | Work-hardening, work readiness, conditioning.                                                                                                                                                                                                                                                    | Not stated                                                                                                                                                                                                                                                                                                                                                                                                                                                                                                                                                                                 | Having a comprehensive and contextually relevant tool that effectively indicates what a vocational rehabilitation service looks like, and /or should look like, will be helpful to occupational therapists that are offering, or wish to offer, vocational rehabilitation services in the public healthcare as well as in private practices. This allows them to set goals and develop their practices in a systematic and mindful manner. |

1  
2  
3  
4  
5  
6  
7  
8  
9  
10  
11  
12  
13  
14  
15  
16  
17  
18  
19  
20  
21  
22  
23  
24  
25  
26  
27  
28  
29  
30  
31  
32  
33  
34  
35  
36  
37  
38  
39  
40  
41  
42  
43  
44  
45  
46

|                                |                                                                                                                       |                                                                                                                                                         |                                            |                                                                                                                                      |            |                                                                                                                    |                                                                                                                                                                                                                                                                                            |                                                                                                                                |                                                                                                                                                                                                                                                                   |
|--------------------------------|-----------------------------------------------------------------------------------------------------------------------|---------------------------------------------------------------------------------------------------------------------------------------------------------|--------------------------------------------|--------------------------------------------------------------------------------------------------------------------------------------|------------|--------------------------------------------------------------------------------------------------------------------|--------------------------------------------------------------------------------------------------------------------------------------------------------------------------------------------------------------------------------------------------------------------------------------------|--------------------------------------------------------------------------------------------------------------------------------|-------------------------------------------------------------------------------------------------------------------------------------------------------------------------------------------------------------------------------------------------------------------|
| Ikenna D. Ebuenyi et al. 2019  | Employability of Persons With Mental Disability: Understanding Lived Experiences in Kenya                             | To highlight the barriers to employment experienced by persons with mental disabilities in Kenya and how they manage to find work against all the odds. | Not stated                                 | Social networks for persons with mental disabilities. Provision of reasonable accommodation in the workplace and healthcare sectors. | Not stated | Not stated                                                                                                         | Setting up social development programs that would provide individuals who want to opt for self-employment. Community based rehabilitation.                                                                                                                                                 | Not stated                                                                                                                     | Our study has highlighted that persons with mental disabilities in Kenya can work. We have also shed light on the various challenges (personal and environmental) affected persons encounter in their quest to enjoy their fundamental human right to employment. |
| Chitra Khare et al 2020        | Employment functioning in people with severe mental illnesses living in urban vs. rural areas in India                | To examine rates and patterns of work, interest in work, and perceived benefits and barriers to work in people with SMI.                                | Private Psychiatric outpatients department | Supported employment                                                                                                                 | Not stated | Not stated                                                                                                         | Teaching illness self-management skills in supported employment. Systematic involvement of families in supported employment, including help with job finding through their extended social networks, collaboration on mental illness management, and facilitating work in family business. | Not stated                                                                                                                     | The findings suggest that attention should be paid to adapting models of vocational rehabilitation to the cultural context of developing countries to improve the employment outcomes of persons with SMI.                                                        |
| Lana van Niekerk 2016          | Identity construction and participation in work: Learning from the experiences of persons with psychiatric disability | To discuss the concept of identity in relation to occupational engagement in the workplace.                                                             | Not stated                                 | Not stated                                                                                                                           | Not stated | Not stated                                                                                                         | Not stated                                                                                                                                                                                                                                                                                 | Not stated                                                                                                                     | Participants who were able to absorb change and disruption by making accommodations and/or allowances for changes in identity tended to continue their participation in valued roles, including the worker role.                                                  |
| Reema Samuel, K. S. Jacob 2017 | Occupational therapy in India: focus on functional recovery and need for empowerment                                  | To discuss the role of occupational therapy in bridging the gap between symptomatic improvement and functional recovery.                                | Not stated                                 | Not stated                                                                                                                           | Not stated | Patient and family empowerment. Focus on achieving functional recovery. Optimizing the fit between an individual's | Group therapy. Motivational enhancement therapy. Rehabilitative and recovery model (prevocational evaluation, vocational training, life skills training). Cognitive therapy. Behaviour                                                                                                     | Improved and enhanced self-esteem through graded tasks, improved goal setting, and problem-solving and decision-making skills. | While it can be argued that the Indian government should modify legislation, open more tertiary care hospitals, grant more educational institutions to train personnel, and likewise, it is time to look at                                                       |

|                                |                                                                                                                           |                                                                                                                                        |            |                                                                                                                                                                                                                                                                                                                                                                                                                                                                                                                                                                                                                      |            |                                          |                                                                                                                                                                                                                                                                                                                                                                                                                                     |            |                                                                                                                                                                                                                                                                                                                                                                                                                                                                        |
|--------------------------------|---------------------------------------------------------------------------------------------------------------------------|----------------------------------------------------------------------------------------------------------------------------------------|------------|----------------------------------------------------------------------------------------------------------------------------------------------------------------------------------------------------------------------------------------------------------------------------------------------------------------------------------------------------------------------------------------------------------------------------------------------------------------------------------------------------------------------------------------------------------------------------------------------------------------------|------------|------------------------------------------|-------------------------------------------------------------------------------------------------------------------------------------------------------------------------------------------------------------------------------------------------------------------------------------------------------------------------------------------------------------------------------------------------------------------------------------|------------|------------------------------------------------------------------------------------------------------------------------------------------------------------------------------------------------------------------------------------------------------------------------------------------------------------------------------------------------------------------------------------------------------------------------------------------------------------------------|
|                                |                                                                                                                           |                                                                                                                                        |            |                                                                                                                                                                                                                                                                                                                                                                                                                                                                                                                                                                                                                      |            | abilities and the environmental demands. | therapy approaches. Graded exercises to manage deficient or maladaptive task and social and occupational skills.                                                                                                                                                                                                                                                                                                                    |            | modifiable factors from an individual perspective. The answer might lie in improving one's own understanding of the complexity of mental illness, increasing the repertoire of treatment models, liaising with the multidisciplinary team, changing our own attitudes about the treatment process, and practicing instead of preaching client-centeredness.                                                                                                            |
| Hester M van Biljon et al 2016 | Opinions of occupational therapists on the positioning of vocational rehabilitation services in Gauteng Public Healthcare | To report on the opinions of occupational therapists on the positioning of vocational rehabilitation services in the Gauteng province. | Not stated | Prevention is an educative service for the prevention of injury at work and to create an awareness of good work practice, averting the development and/or exacerbation of pathology. Screening of general or specific work related skills is a short prescriptive process used to filter and effectively refer patients to more specialised therapists or facilities and supports efficient service delivery. Assessment services involve the assessment of the ability of a person who has an injury or illness's, to be able to work. Intervention services are programmes aimed at correcting or compensating for | Not stated | Not stated                               | Stress management. Job modification, case management, pain management, work hardening, work preparation or readiness, work visits, work guidance, work-place accommodation, work adaptation, job seekers groups, self-employment initiatives, support groups and other return to work efforts. Job analysis. Vocational guidance and counselling, outpatient support groups, job acquainting, adaptation and accommodation efforts. | Not stated | The results of this survey showed a general lack of consensus amongst occupational therapists about what vocational rehabilitation services should be offered at the different levels of public healthcare. With singular exceptions the generic opinion was that occupational therapy's vocational rehabilitation services should be offered in public healthcare. No other opinions from this survey give guidance or insight to support planning and policy making. |

|                              |                                                                                   |                                                                                                            |            |                                                                                                                                                                                                                                                                                                                                                           |            |                                                                       |                                                                                                                                                                                                                                                |            |                                                                                                                                                                                                                                                                                                                                                                       |
|------------------------------|-----------------------------------------------------------------------------------|------------------------------------------------------------------------------------------------------------|------------|-----------------------------------------------------------------------------------------------------------------------------------------------------------------------------------------------------------------------------------------------------------------------------------------------------------------------------------------------------------|------------|-----------------------------------------------------------------------|------------------------------------------------------------------------------------------------------------------------------------------------------------------------------------------------------------------------------------------------|------------|-----------------------------------------------------------------------------------------------------------------------------------------------------------------------------------------------------------------------------------------------------------------------------------------------------------------------------------------------------------------------|
|                              |                                                                                   |                                                                                                            |            | ability to work deficits. Placement services are the returning of patients to their own, alternative or new work in the open labour market; or to sheltered - or protected workshops. Follow up is done of patients who used the services offered, this could be with employers, referral sources, family members and the patients themselves             |            |                                                                       |                                                                                                                                                                                                                                                |            |                                                                                                                                                                                                                                                                                                                                                                       |
| Tania Buys 2015              | Professional competencies in vocational rehabilitation: Results of a Delphi study | To identify professional competencies required to practice in the area of work by occupational therapists. | Not stated | Vocational training, placement and follow-up. Work readiness/ work preparation programmes                                                                                                                                                                                                                                                                 | Not stated | Client centered, objectivity, adaptability, professionalism, respect. | Vocational guidance, job analysis, workplace visits, job description review, reasonable accommodations, work hardening, work conditioning, work simulation, life skills, stress management, prevocational skills, job-seeking skills training. | Not stated | We need to as an occupational therapy profession to ensure that we provide competent, professional, contextually relevant vocational rehabilitation services to clients which enables them to fulfil their roles as independent citizens in a democratic South Africa free from disability discrimination.                                                            |
| Kreshnee Govender et al 2018 | The role of the occupational therapist in case management in South Africa         | To identify the occupational therapist's role and scope of practice in case management in South Africa.    | Not stated | Case management - appears to be utilised as part of an early intervention approach once there has been an extended period of absence from work or a high rate of absence due to illness (where the service entails comprehensive assessment to determine a care plan and coordinating and monitoring client care to prevent long term absenteeism thereby | Not stated | Planning with the client. Client advocacy.                            | Work site visits. Liaison with the employer to aid in the employee's transition back to work, client's reintegration in the work environment. Develop a care plan. Re-skilling/training to aid in a work re-entry.                             | Not stated | The study reveals that occupational therapists in South Africa are involved in case manager functions and are implementing case management as a strategy or approach to manage incapacity due to ill-health and disability in the workplace. Occupational therapists in South Africa that are positioned in various settings viz. insurance, private practice, health |

|                                                       |                                             |            |                                                                                                     |                                                                                                                                                                                                                                                                                                                                                                                                                                                                                                  |            |            |                                                                                                                                                                                                                                                                                                                                      |            |                                                                                                                                                                                                                                                                                                                                                                                                                                                                                                                                                                                                                                                                                                                                                                                                                                                                  |
|-------------------------------------------------------|---------------------------------------------|------------|-----------------------------------------------------------------------------------------------------|--------------------------------------------------------------------------------------------------------------------------------------------------------------------------------------------------------------------------------------------------------------------------------------------------------------------------------------------------------------------------------------------------------------------------------------------------------------------------------------------------|------------|------------|--------------------------------------------------------------------------------------------------------------------------------------------------------------------------------------------------------------------------------------------------------------------------------------------------------------------------------------|------------|------------------------------------------------------------------------------------------------------------------------------------------------------------------------------------------------------------------------------------------------------------------------------------------------------------------------------------------------------------------------------------------------------------------------------------------------------------------------------------------------------------------------------------------------------------------------------------------------------------------------------------------------------------------------------------------------------------------------------------------------------------------------------------------------------------------------------------------------------------------|
|                                                       |                                             |            |                                                                                                     | contributing to cost containment).                                                                                                                                                                                                                                                                                                                                                                                                                                                               |            |            |                                                                                                                                                                                                                                                                                                                                      |            | consult ing, and Workmen’s Compensation, have indicated involvement in case management and this study confirmed the utilisation of this intervention in vocational rehabilitation and as an element of disability management.                                                                                                                                                                                                                                                                                                                                                                                                                                                                                                                                                                                                                                    |
| Occupational Therapy Association Of South Africa 2020 | Position paper on vocational rehabilitation | Not stated | Various settings including schools for learners with special needs transitioning to world of world. | Prevention is an educative service for the prevention of injury at work and to create an awareness of good work practice, averting the development and/or exacerbation of pathology. Screening of general or specific work related skills is a short prescriptive process used to filter and effectively refer patients to more experienced therapists. Assessment and evaluation services. Intervention services are aimed at correcting adapting or compensating for ability to work deficits. | Not stated | Not stated | Skills training, sheltered workshops, entrepreneurial and self-employment initiatives. Job modification, case management, work trials, work hardening, work preparation/readiness, work visits, work/vocational guidance and counselling, work-palce accommodation, work adaption, job seekers groups, support groups. Job analysis, | Not stated | The primary aim of occupational therapy’s vocational rehabilitation intervention needs to be relevant and of therapeutic value to the client so as to meet SDG9 as far as it is possible. The type of vocational rehabilitation service that occupational therapists in South Africa offer should be dictated by the vocational needs and aspirations, social structures and contextual realities of the clients. All occupational therapists can and should be able to offer basic vocational rehabilitation. Newly qualified occupational therapists have to be able to work independently at a basic level in a variety of vocational rehabilitation settings. Those vocational rehabilitation services that require competencies beyond a basic level need to be referred to therapists who have acquired, and can provide proof of the additional necessary |

|                              |                                                                                                                   |                                                                                                                                                                                                     |                                                                                                               |                      |            |                                                                                                                                                     |                                                                                                                                                                                                                                                                                                                                                                                                                                                                                                                                                                                                |                                                                                                                                                                                                                                                                                   |                                                                                                                                                                                                                                                                                                                                                                                                                                                                                                                                                     |
|------------------------------|-------------------------------------------------------------------------------------------------------------------|-----------------------------------------------------------------------------------------------------------------------------------------------------------------------------------------------------|---------------------------------------------------------------------------------------------------------------|----------------------|------------|-----------------------------------------------------------------------------------------------------------------------------------------------------|------------------------------------------------------------------------------------------------------------------------------------------------------------------------------------------------------------------------------------------------------------------------------------------------------------------------------------------------------------------------------------------------------------------------------------------------------------------------------------------------------------------------------------------------------------------------------------------------|-----------------------------------------------------------------------------------------------------------------------------------------------------------------------------------------------------------------------------------------------------------------------------------|-----------------------------------------------------------------------------------------------------------------------------------------------------------------------------------------------------------------------------------------------------------------------------------------------------------------------------------------------------------------------------------------------------------------------------------------------------------------------------------------------------------------------------------------------------|
|                              |                                                                                                                   |                                                                                                                                                                                                     |                                                                                                               |                      |            |                                                                                                                                                     |                                                                                                                                                                                                                                                                                                                                                                                                                                                                                                                                                                                                |                                                                                                                                                                                                                                                                                   | competencies that provide competent, professional, contextually relevant vocational rehabilitation services to clients they see.                                                                                                                                                                                                                                                                                                                                                                                                                    |
| Madri Engelbrecht et al 2017 | Supported Employment for people with mental disabilities in South Africa: cost calculation of service utilisation | To report on the cost and affordability of SE services offered to people with mental disabilities in South Africa.                                                                                  | Psychiatric hospital in Cape Town (clients from forensic wards, general wards and the outpatient department). | Supported employment | Not stated | Not stated                                                                                                                                          | Job matching. Work in protective factories. Personal life skills training (money handling, grooming, use of transportation, management of symptoms, time management, communication). Simulated work. Trial placement, job advocacy ( at job site with employers and co-workers). Evaluation of goodness of job fit. Evaluation of employment potential. Work visit ( to observe real work, to discuss reasonable accommodation, to assist with performance appraisal). Job coaching and job support. Bridging programme in preparation for employment in the open labour market. Support group | Reduction in the consumption of mental health services by people who entered employment. SE promotes an outcome of open labour market employment with the associated monetary and non-monetary benefits.                                                                          | Evidence from the study thus reflects the cost of SE services to people with mental disability as substantially lower than the current government investment in disability grants and protective workshops subsidies. SE will combat unemployment, work towards poverty reduction and redress inequality as it pertains to people with disabilities. engagement with funding sources that currently support traditional vocational rehabilitation approaches is needed to present SE as a viable alternative strategy for return-to-work endeavors. |
| Lana Van Niekerk et al 2011  | Supported employment: Recommendations for successful implementation in South Africa                               | To report on the findings of a descriptive qualitative study in which supported employment (SE), as a potential strategy to facilitate the employment of persons with disability in the open labour | Not stated                                                                                                    | Supported employment | Not stated | Competitive employment should always be the ultimate outcome. A client-centered approach should be used. Support should be provided to ensure long- | Job finding, job analysis, job matching, job coaching. On-going support that is determined by the worker's individual needs. Protective and sheltered workshops.                                                                                                                                                                                                                                                                                                                                                                                                                               | SE achieve participation in competitive employment. Participants in SE earned more and worked more hours per month than those who had had prevocational training. Person with disabilities have an opportunity to be an active and contributing member of the society. Lessen the | "The authors propose SE as a model of choice to drive the process of economic empowerment for persons facing disabling conditions. In developing a SE model suitable for South Africa, funding and infrastructure should be used in such a way that                                                                                                                                                                                                                                                                                                 |

|                             |                                                                                                            |                                                                                                                                                                          |                                                                                                               |                                                                                                                                                                                         |            |                                                                                                                                                               |                                                                                                                                                                                                                                                                                                                                                                                                                                                                                                                                         |                                                                                                                                                                                                                                                                           |                                                                                                                                                                                                                                                                                                                                                                                                                                                                                    |
|-----------------------------|------------------------------------------------------------------------------------------------------------|--------------------------------------------------------------------------------------------------------------------------------------------------------------------------|---------------------------------------------------------------------------------------------------------------|-----------------------------------------------------------------------------------------------------------------------------------------------------------------------------------------|------------|---------------------------------------------------------------------------------------------------------------------------------------------------------------|-----------------------------------------------------------------------------------------------------------------------------------------------------------------------------------------------------------------------------------------------------------------------------------------------------------------------------------------------------------------------------------------------------------------------------------------------------------------------------------------------------------------------------------------|---------------------------------------------------------------------------------------------------------------------------------------------------------------------------------------------------------------------------------------------------------------------------|------------------------------------------------------------------------------------------------------------------------------------------------------------------------------------------------------------------------------------------------------------------------------------------------------------------------------------------------------------------------------------------------------------------------------------------------------------------------------------|
|                             |                                                                                                            | market in South Africa.                                                                                                                                                  |                                                                                                               |                                                                                                                                                                                         |            | term sustainability employment. Support consumer goals and empower them with choices and information. No more support than needed and no less than necessary. |                                                                                                                                                                                                                                                                                                                                                                                                                                                                                                                                         | economic burden the government. Positively influence the disabled person's health and well-being. Provided income, personal development, provided arena for social development, self esteem and identity. Integration of persons with disability into mainstream society. | integrated career management is a viable option for persons with disability. A holistic approach is needed because components of SE, such as the assessment of work skills, placement in suitable work and reasonable accommodation do not necessarily follow a linear process."                                                                                                                                                                                                   |
| Lana Van Niekerk et al 2015 | Time utilisation trends of supported employment services by persons with mental disability in South Africa | To determine the feasibility of supported employment (SE) as a strategy with which to facilitate the employment of persons with disability in competitive work contexts. | Psychiatric hospital in Cape Town (clients from forensic wards, general wards and the outpatient department). | Supported employment (SE) is a return-to-work strategy promoting the inclusion of persons with disabilities in competitive employment environments. Prepare work placement. Work visit. | Not stated | On-going support. Individualized support. Advocacy.                                                                                                           | Job finding, Job analysis, Job matching and Job coaching. Reasonable accommodation. On-going support. Protective workshops. Non-job advocacy. Personal life skills. Simulated work. Trial placement, Person-centred instructional plans, Job advocacy - at job site with employers. Job advocacy - co-workers (and customers). Evaluation of employment potential. Evaluation of goodness of job fit. Work visit to observe real work. Work visit to discuss reasonable accommodation. Work visit to assist with performance appraisal. | To achieve employment outcomes for people with mental disabilities. Integration of mental health service users in the workplace.                                                                                                                                          | SE services can be considered as a viable option for return to work in resource-constrained environments. Providers of SE services will need to modify approaches in order to meet contextual realities. Because the bulk of costs associated with SE are in the remuneration of service providers, understanding the number of provider hours necessary will be an important consideration for employers in middle income countries who are concerned with the feasibility of SE. |



# BMJ Open

## A scoping review exploring vocational rehabilitation interventions for mental health service users with chronic mental illness in low-income to upper-middle-income countries

|                                 |                                                                                                                                                                                                                                                                                                                                                                       |
|---------------------------------|-----------------------------------------------------------------------------------------------------------------------------------------------------------------------------------------------------------------------------------------------------------------------------------------------------------------------------------------------------------------------|
| Journal:                        | <i>BMJ Open</i>                                                                                                                                                                                                                                                                                                                                                       |
| Manuscript ID                   | bmjopen-2021-059211.R1                                                                                                                                                                                                                                                                                                                                                |
| Article Type:                   | Original research                                                                                                                                                                                                                                                                                                                                                     |
| Date Submitted by the Author:   | 14-Feb-2022                                                                                                                                                                                                                                                                                                                                                           |
| Complete List of Authors:       | Chimara, Munyaradzi; University of Namibia, Faculty of Health Sciences & Veterinary Medicine, Occupational Therapy & Physiotherapy<br>Van Niekerk, Lana; Stellenbosch University Faculty of Medicine and Health Sciences, Health and Rehabilitation<br>van Biljon, Hester; Stellenbosch University Faculty of Medicine and Health Sciences, Health and Rehabilitation |
| <b>Primary Subject Heading</b>: | Rehabilitation medicine                                                                                                                                                                                                                                                                                                                                               |
| Secondary Subject Heading:      | Mental health                                                                                                                                                                                                                                                                                                                                                         |
| Keywords:                       | REHABILITATION MEDICINE, Adult psychiatry < PSYCHIATRY, MENTAL HEALTH                                                                                                                                                                                                                                                                                                 |
|                                 |                                                                                                                                                                                                                                                                                                                                                                       |

SCHOLARONE™  
Manuscripts



I, the Submitting Author has the right to grant and does grant on behalf of all authors of the Work (as defined in the below author licence), an exclusive licence and/or a non-exclusive licence for contributions from authors who are: i) UK Crown employees; ii) where BMJ has agreed a CC-BY licence shall apply, and/or iii) in accordance with the terms applicable for US Federal Government officers or employees acting as part of their official duties; on a worldwide, perpetual, irrevocable, royalty-free basis to BMJ Publishing Group Ltd ("BMJ") its licensees and where the relevant Journal is co-owned by BMJ to the co-owners of the Journal, to publish the Work in this journal and any other BMJ products and to exploit all rights, as set out in our [licence](#).

The Submitting Author accepts and understands that any supply made under these terms is made by BMJ to the Submitting Author unless you are acting as an employee on behalf of your employer or a postgraduate student of an affiliated institution which is paying any applicable article publishing charge ("APC") for Open Access articles. Where the Submitting Author wishes to make the Work available on an Open Access basis (and intends to pay the relevant APC), the terms of reuse of such Open Access shall be governed by a Creative Commons licence – details of these licences and which [Creative Commons](#) licence will apply to this Work are set out in our licence referred to above.

Other than as permitted in any relevant BMJ Author's Self Archiving Policies, I confirm this Work has not been accepted for publication elsewhere, is not being considered for publication elsewhere and does not duplicate material already published. I confirm all authors consent to publication of this Work and authorise the granting of this licence.

## Title

**A scoping review exploring vocational rehabilitation interventions for mental health service users with chronic mental illness in low-income to upper-middle-income countries**

**Author:** Munyaradzi Chimara (Corresponding Author)  
**Postal Address:** P.O. Box 50738, Bachbrecht, Windhoek, Namibia  
**Department:** Occupational Therapy and Physiotherapy  
**Institution:** University of Namibia  
**City:** Windhoek  
**Country:** Namibia  
**Email Address:** [munyagreen@hotmail.com](mailto:munyagreen@hotmail.com) or [mchimara@unam.na](mailto:mchimara@unam.na)  
**Telephone:** +264 813 906 771 and +264 61 206 5083  
**ORCID** 0000-0002-5720-3867

**Co-author 1:** Lana van Niekerk  
**Department:** Division of Occupational Therapy, Department of Health and Rehabilitation Sciences, Faculty of Medicine and Health Sciences.  
**Institution:** Stellenbosch University  
**City:** Cape Town  
**Country:** South Africa  
**Email:** [lanavn@sun.ac.za](mailto:lanavn@sun.ac.za)  
**ORCID** 0000-0003-0003-6006

**Co-author 2:** Hester Maria van Biljon  
**Department:** Division of Occupational Therapy, Department of Health and Rehabilitation Sciences, Faculty of Medicine and Health Sciences  
**Institution:** Stellenbosch University  
**City:** Cape Town  
**Country:** South Africa  
**Email:** [hestermvanbiljon@gmail.com](mailto:hestermvanbiljon@gmail.com)  
**ORCID** 0000-0003-4433-6457

**Wordcount:** 5269

## Abstract

### Objective

To synthesize research published on vocational rehabilitation (VR) interventions offered in institutions, by occupational therapists, to mental health service users (MHSUs) with chronic mental illness, in low-income to upper middle-income countries (L-UMIC).

## Design

Arksey and O'Malley's five-stage methodological framework, the Preferred Reporting Items for Systematic Reviews extension for Scoping Reviews (PRISMA-ScR) and Joanna Briggs scoping review guidelines were used.

## Data Sources

PsycInfo, EBSCOhost, HINARI, Google scholar, Medline, CINAHL, PubMed, Cochrane Library, Scopus, Science Direct and Wiley online library were searched between 15 July and 31 August 2021.

## Eligibility Criteria

Sources, published in English between 2011 and 2021, on institution-based VR in occupational therapy for MHSUs who have chronic mental illness in L-UMIC were included.

## Data extraction and synthesis

Three reviewers used Mendeley to manage identified references, Rayyan for abstract and full text screening, and Microsoft Excel for data extraction. Data was sifted and sorted by key categories and themes.

## Results

895 sources were identified, and their title and abstracts reviewed. 207 sources were identified, and their full texts reviewed. 12 articles were identified for this scoping review. Types of VR intervention included supported employment, case management and prevocational skills training. Client centeredness, support and empowerment were the key VR principles identified. Teaching of illness self-management, job analysis and matching, job coaching, trial placement, and vocational guidance and counseling, were the main intervention strategies reported.

## Conclusions

VR intervention in institutions for MHSUs in L-UMIC revealed the multidimensional uniqueness of individual MHSU's vocational ability, needs and contexts. The interventions allowed client centered approaches that offered support, and empowerment beyond the boundaries of the institutions. Occupational therapists offering VR need to expand their interventions beyond their institutions to contexts where MHSUs are working or intending to work.

## Strength and limitations of the study

- The study followed a scoping review protocol that was peer reviewed and published in BMJ Open on 14 July 2021.<sup>(1)</sup>
- Pre-scheduled weekly meetings among the three authors were used to promote momentum and discussions throughout the project.
- The authors used human and other library resources from two universities, namely the University of Namibia and Stellenbosch University.
- Authors concede that sources from non-English speaking countries might have been missed and that many such countries fall within the socio-economic inclusion criteria.
- The review was limited to English sources as there was no funding available for translation.
- Due to the dearth of publications from L-UMIC the evidence presented in this article cannot be seen to represent vocational rehabilitation for MHSUs within the scope of occupational therapy globally.

**Key words:** vocational rehabilitation, chronic mental illness, occupational therapy

## Introduction

Vocational Rehabilitation (VR) of mental health service users (MHSUs) with chronic mental illness is an area of concern in low-income to upper middle-income countries (L-UMIC). The majority of global burden of mental disorders is located in L-UMIC<sup>(2)</sup>, yet public expenditure on mental health, including rehabilitation services, is very low in these countries where less than one percent of total budget is allocated for mental health with resources predominantly directed to institution based care.<sup>(3,4)</sup> One such country is Namibia, located in the south-western part of Africa, and in which the first author (MC) resides. The burden of mental illness in Namibia is 2838,71 per 100 000 population.<sup>(4)</sup> This scoping review forms the first phase of a four phased project, and the envisaged main outcome of the project is a VR practice framework for MHSUs with chronic mental illness in Namibia.

The World Bank classifies countries according to their gross national income (GNI) per capita in United States (US) dollars.<sup>(5)</sup> There are four classes of economies. For the 2022 fiscal year the GNI per capita for low-income economies was \$1046 or less; for lower middle income economies \$1046 to \$4095; upper middle-income economies ranged from \$4096 to \$12 695; and high-income economies were those with GNI per capita of \$12 696 or more.<sup>(6)</sup> Namibia was ranked as upper middle-income country at the time of this study. Other countries ranked as upper middle income are South Africa, Botswana and Libya, whereas Zimbabwe, India and Kenya are examples of lower middle-income countries. Examples of low income countries are Malawi, Uganda and Burundi.<sup>(6)</sup>

Chronic mental illness can be defined using three criteria suggested by Bachrach<sup>(7)</sup>, namely diagnostic criterion, duration of illness and disability criterion. The Diagnostic and Statistical Manual of Mental Disorders fifth edition (DSM-5) developed by the American Psychiatric Association is widely used in L-UMIC for the diagnostic criteria. Using the DSM-5, common mental conditions include schizophrenia spectrum and other psychotic conditions, bipolar and related disorders, depressive disorders and anxiety disorders.<sup>(8)</sup> In this review, duration of mental illness considered for chronicity was two years regardless of the number of relapses and remissions. The disability criterion, which is perhaps the most important of the three criteria for chronicity from the perspective of rehabilitation personnel, entails disturbing behavior, impairment in work and non-work activities and mild impairment in basic needs.<sup>(7)</sup>

Occupational therapists are healthcare professionals who use occupations or activities to restore or maintain function in the areas of work, self-care and leisure for people with physical and/or psychosocial dysfunctions.<sup>(1)</sup> Occupational therapists play an important role in vocational rehabilitation (VR) of mental health service users (MHSUs) with chronic mental illness who are either employed, unemployed or on sick leave.<sup>(9)</sup> Through VR occupational therapists help MHSUs to gain work, return to work or maintain an existing worker role.<sup>(10)</sup> Ross<sup>(10)</sup> highlights six stages followed in the VR process that are somewhat similar to the occupational therapy process. These are referral, assessment, prevocational phase, worksite visit, return to work plan, intervention, evaluation and discharge. Using the VR process, occupational therapists apply various VR strategies, and work with a variety of people and professions spanning both industrial and healthcare sectors.<sup>(9)</sup> They employ a variety of occupational therapy professional competencies that include activity analysis, job analysis, identification of essential job

1  
2  
3 functions, knowledge of mental health conditions, functional capacity evaluations etc.<sup>(11)</sup> In the  
4 Namibian context, occupational therapists who provide VR service are institution-based  
5 regardless of the clientele group they serve. MHSUs with chronic mental illness are an  
6 important clientele group for occupational therapist practicing VR because of their high level  
7 of vulnerability. Often, MHSUs with chronic mental illness have to compete for employment  
8 in a Namibian economy where broad unemployment rate stands at 33.4%.<sup>(12)</sup> It is therefore  
9 imperative that occupational therapists providing VR to MHSUs with chronic mental illness in  
10 L-UMIC such as Namibia are guided by a framework that is sensitive to contextual realities.  
11  
12  
13

14 There is limited consensus in the literature on the definition of the concept and categorization  
15 of VR intervention offered by occupational therapists. One plausible categorization of VR  
16 types is by van Biljon et al<sup>(13)</sup> who identified six types, namely, prevention, screening,  
17 assessment, intervention, placement and follow-up. VR intervention focuses on correcting or  
18 compensating for work ability deficits and improve work performance.<sup>(13)</sup> Suijkerbuijk et al<sup>(14)</sup>  
19 identified four types of VR interventions. These are (i) prevocational training, (ii) transitional  
20 employment, (iii) supported employment, and (iv) augmented supported employment.  
21 Prevocational skills training includes job-related skills training and symptom-related skills  
22 training, with the latter comprising cognitive training and social skills training. Transitional  
23 employment is a highly structured intervention program where MHSUs who have expressed  
24 the desire to work are placed in the open labour market on a part-time basis for a period ranging  
25 from six to nine months.<sup>(15)</sup> During the period of transitional employment, MHSUs receive on-  
26 the-job and off-site support from the VR team. Unlike transitional employment, supported  
27 employment usually has no time limit, MHSUs follow a competitive interview process for the  
28 position, and they are paid at the prevailing wage of the position.<sup>(15)</sup> Supported employment is  
29 a career-oriented VR intervention where a MHSU is assisted accessing and being successful  
30 with employment through on-the-job and offsite support. Augmented supported employment  
31 is a combination of supported employment with either prevocational training or transitional  
32 employment. In addition to VR interventions identified by Suijkerbuijk et al<sup>(14)</sup>, Swart and  
33 Buys<sup>(11)</sup> included work-hardening and case management. It is important to note that these VR  
34 intervention types do not necessarily follow a sequential process. Also, VR intervention  
35 categories seem to be overlapping. For example, Suijkerbuijk et al<sup>(14)</sup> categorized transitional  
36 and supported employment as VR intervention types, whereas van Biljon et al<sup>(13)</sup> categorized  
37 these under placement.  
38  
39  
40  
41  
42  
43

44 Vocational rehabilitation outcomes have been differentiated as hard outcomes or soft  
45 outcomes.<sup>(10)</sup> Ross<sup>(10)</sup> contends that soft outcomes are measures applicable to service users  
46 believed to be furthest away from labour market and therefore need a greater number of  
47 stepping stones. Examples of soft VR outcomes include engaging in voluntary work, doing a  
48 training course or achieving better quality of life. Examples of hard VR outcomes are; reduced  
49 number of days of absence from work, increased chances of returning to work, and improved  
50 benefit-to-cost ratios.<sup>(10)</sup> Other VR outcomes include improved self-esteem and self-concept,  
51 reduced symptoms of mental illness, increased personal empowerment and higher ratings of  
52 subjective wellbeing.<sup>(16)</sup>  
53  
54  
55

### 56 Rationale

57 This scoping review comprises the first of four phases the authors will follow in developing a  
58 contextually relevant VR framework for MHSUs with chronic mental illness in Namibia. The  
59 purpose of this scoping review was to map the current evidence on institution-based VR for  
60

MHSUs with chronic mental illness that fall within the occupational therapy scope of practice as defined by the World Federation of Occupational Therapists (WFOT), and originate in L-UMIC. The study identified VR interventions types, strategies, principles as well as VR outcomes. The authors focused on institution-based VR because of the current occupational therapy practice set-up in Namibia where therapists are institution-based. A scoping review was selected because it allows for exploring the breadth and depth of available evidence for the given population, concept and context.<sup>(16)</sup> The review findings will inform the second phase of the primary author's doctoral study, which will focus on engaging with stakeholders to explore factors that should be considered by occupational therapists for their VR with MHSU's in Namibia.<sup>(1)</sup>

### Review Question

What is known from the existing literature about healthcare institution-based VR for MHSUs with chronic mental illness from L-UMIC?

### Objectives

- i. Provide a detailed overview of all the studies on institution-based VR of MHSUs with chronic mental illness, in occupational therapy, in L-UMIC.
- ii. Identify institution-based VR interventions in occupational therapy for MHSUs who have chronic mental illness in L-UMIC.

## Methods

### Study Design

This scoping review followed a protocol<sup>(1)</sup> (Annex D) that was peer reviewed and published in the BMJ Open. As highlighted in the protocol, the scoping review was guided by a methodological framework originally suggested by Arksey and O'Malley<sup>(17)</sup>, and subsequently refined by Levac et al<sup>(18)</sup> and Colquhoun et al<sup>(19)</sup>. The framework follows five successive steps namely; (i) defining the research question, (ii) identifying relevant studies, (iii) study selection, (iv) charting the data, and finally (v) collating, summarizing and reporting the results. Reporting of the findings of this review was guided by the Preferred Reporting Items for Systematic Reviews extension for Scoping Reviews (PRISMA-ScR) proposed by Tricco et al.<sup>(20)</sup> The PRISMA-ScR checklist used is attached as annex A.

### Eligibility Criteria

The population, concept and context (PCC) criteria<sup>(21)</sup> was used to define the eligibility criteria. The population (P) was MHSUs who have chronic mental illness. Chronic mental illness was based on three aspects, (i) diagnosis criteria, (ii) period of illness, and (iii) the disability criteria.<sup>(7)</sup> In this review, chronic mental illness is non-organic and personality disorders; long history (2 years or more) of previous hospitalizations or outpatient treatment; and disability criterion including disturbing behavior, impairment in work and non-work activities and mild impairment in basic needs.<sup>(1,22)</sup> The concept (C) was institution-based VR provided for MHSUs by occupational therapists stationed at a facility. These facilities include clinics, hospitals or rehabilitation centres, day-care centres, half-way houses or home, sheltered employment facilities, correctional facilities and forensic mental healthcare settings.<sup>(1)</sup> In this study, VR is defined as evidence-based approach that is provided in different settings, services and activities to working age individuals with mental health-related impairments, limitations or restrictions with work, and whose primary aim is to optimise work participation.<sup>(11)</sup> The context (C) was L-UMIC as defined by World Bank income grouping. Sources published in English only

1  
2  
3 between 2011 and 2021 were eligible for inclusion The rationale for including sources from  
4 the last decade (2011 – 2021) was twofold. First, there was significant development that  
5 transpired in terms of VR during this period from ‘train and place’ to ‘place first then train’.  
6 The second reason was that there has been an increase in the number of occupational therapists  
7 providing VR services to MHSUs in the last decade, therefore it was important for authors to  
8 focus on research produced in the same period.  
9  
10

### 11 Search Strategy

12 The search strategy was developed with the assistance of a qualified subject librarian from the  
13 University of Stellenbosch. A preliminary search was conducted on two databases, Pubmed  
14 and CINAHL. Results of the preliminary search led to the refinement of the search strategy  
15 covering all the three elements (PCC) of the scoping review question. The following main  
16 search string was used for identifying relevant sources: ( *"Psychiatric Rehabilitation" OR*  
17 *"Rehabilitation, Vocational" OR "work rehabilitation" OR "Occupational Therapy" ) AND (*  
18 *mental disorders OR mental illness OR psychiatric disorders OR psychiatric illness ) NOT (*  
19 *"North America" OR Europe\** ) AND ( *severe OR chronic OR long-term OR persistent* ).  
20 Medical Subject Heading (MeSH) terms, Boolean operators (i.e. AND, OR, NOT) and  
21 truncation strategy were used to refine the search.<sup>(1)</sup> The search was carried out in each of the  
22 following electronic data bases; PsycInfo, EBSCOhost, Google Scholar, Medline, CINAHL,  
23 PubMed, Cochrane library, Scopus, Science Direct, HINARI and Wiley online. Grey literature  
24 sources were searched through library links for universities subscribed to by all three authors  
25 engaged in this review. Additional search was done through checking bibliographies of all the  
26 included sources. The full search strategy is attached as annex B  
27  
28  
29  
30  
31

### 32 Source of Evidence Screening and Selection

33 Sources that were identified through the above mentioned search strategy were uploaded in  
34 Mendeley Reference Manager<sup>(23)</sup> and initial deduplication was done. Sources were then  
35 exported from Mendeley to Rayyan<sup>(24)</sup> web application for systematic reviews where second  
36 deduplication was conducted. The first and third authors (LvN and HMvB) independently  
37 performed title and abstract screening of the uploaded sources guided by the PCC and inclusion  
38 criteria. The authors included peer-reviewed sources on VR interventions that fit into the  
39 occupational therapy scope and were published in English between 2011 and 2021 from L-  
40 UMICs.<sup>(1)</sup> The second author (LvN) resolved conflicts and her vote was final in making the  
41 decision to include or exclude a source. A second project was opened in Rayyan<sup>(24)</sup> where  
42 sources that were screened for title and abstract were loaded for full text screening. The first  
43 and third authors (MC and HMvB) did full text screening of first three sources together before  
44 they independently screened the rest of the sources. Conflicts were discussed and resolved  
45 with input from the second author (LvN), and the inclusion or exclusion criteria was regularly  
46 checked. Figure 1 below is the PRISMA flow diagram illustrating the process of searching  
47 and selecting sources for inclusion in this review.  
48  
49  
50  
51

52 [Figure 1: PRISMA Flow Diagram]  
53  
54  
55  
56  
57  
58  
59  
60



### Extraction of Results

Data were extracted from each of the twelve included sources using a data extraction form that was developed by the first author and independently reviewed by the second and third authors. The template for intervention description and replication (TIDieR) checklist<sup>(25)</sup> was incorporated in the data extraction form. Extracted data covered the following; author (s), year of publication, country of origin, aim/purpose, study population and sample size, methodology, VR intervention type, VR intervention principles, VR intervention strategies, outcomes of the interventions, main conclusions and type of mental health care settings. Also, a summary of the levels of evidence of included sources was presented. The extracted data was transferred to spreadsheet and all three authors reviewed the information.

### Ethics

Ethical clearance for this study was not required as secondary data was utilised and there was no MHSUs involved.

### Patient and Public Involvement

There was no patient or public involvement.

## Results

### Characteristics of Included Sources

A total of 12 sources from four L-UMIC from the continents of Africa, Asia and South America were included. The countries were South Africa – 8 sources, India – 2 sources, Brazil and Kenya – 1 source each. All 12 sources were published between 2011 and 2020. The total number of study participants reported in the included sources was 1581, and only two sources reported the combined attrition of 108 participants. Age of the participants ranged from 18 to 60 years. Four studies<sup>(22)(26)(27)(28)</sup> were conducted in urban settings, one in both urban and rural settings<sup>(29)</sup>, and the rest of the included sources did not report on this aspect. In terms of socio-economic status of the participants, two sources<sup>(26)(28)</sup> reported that participants were from low socio-economic status stratum, whereas the rest of the included sources did not state this component. Diagnoses reported in the sources were: schizophrenia, schizoaffective disorder, anxiety disorder, bipolar type I disorder, intellectual disability, major depression and obsessive-compulsive disorder.

The included sources used the following study designs: qualitative design - 4, quantitative design – 3, mixed methods design – 2, and Delphi Method -1. Two sources did not clearly state the design used. Qualitative designs included action research, phenomenology, interpretive biography, multiple collaborative research and focus group interviews. Single blinded randomized control and longitudinal descriptive designs were employed in quantitative designs. Table 1 below is a summary of the characteristics of included sources.

Table 1: Characteristics of Included Sources

| Authors & year of publication     | Country & Region      | Study Design                                                                                    | Study Participants/target population                                                                                                                | Sample size                                                                              | Gender               | Age of the study participants/target population | Location      | Socio-economic status of the study participants/target population | Diagnosis of the study participants/target population                       |
|-----------------------------------|-----------------------|-------------------------------------------------------------------------------------------------|-----------------------------------------------------------------------------------------------------------------------------------------------------|------------------------------------------------------------------------------------------|----------------------|-------------------------------------------------|---------------|-------------------------------------------------------------------|-----------------------------------------------------------------------------|
| Adriana D.B. Vizzotto et al. 2016 | Brazil, South America | Randomized controlled, single blind pilot study comparing the OGI method with craft activities. | Patients with Treatment Resistant Schizophrenia                                                                                                     | 30                                                                                       | Male 24, female 5.   | 18 - 55                                         | Urban         | Not stated                                                        | Schizophrenia                                                               |
| Hester van Biljon et al. 2015     | South Africa, Africa  | Action research phenomenology                                                                   | Occupational therapists working in Gauteng's public healthcare, who were interested in vocational rehabilitation. Vocational rehabilitation experts | 127 Occupational Therapists and 39 Vocational Rehabilitation experts                     | Not stated           | Not stated                                      | Not stated    | Not stated                                                        | Not specified                                                               |
| Ikenna D. Ebuenyi et al. 2019     | Kenya, Africa         | A sequential mixed-method design                                                                | Persons with mental/psychosocial disabilities.                                                                                                      | 14 Individual interviews, 30 individuals in FGDs, 72 participated in quantitative study. | Males and females    | Mean age of 40 years                            | Not stated    | Not stated                                                        | Depression, schizophrenia, bipolar mood disorder                            |
| Chitra Khare et al 2020           | India, Asia           | Not specified                                                                                   | Psychiatric outpatients                                                                                                                             | 552                                                                                      | Male 311, female 231 | 18-60                                           | Rural & Urban | Not stated                                                        | schizophrenia, schizoaffective disorder, bipolar disorder, major depression |
| Reema Samuel, K. S. Jacob 2017    | India, Asia           | Narrative paper                                                                                 | Not stated                                                                                                                                          | Not stated                                                                               | Not stated           | Not stated                                      | Not stated    | Not stated                                                        | Not specified                                                               |
| Hester M van Biljon et al 2016    | South Africa, Africa  | A multi-collaborative                                                                           | Occupational therapists working in Gauteng's public healthcare, who                                                                                 | 14 VRTT group, 242 OT clinicians                                                         | Not stated           | Not stated                                      | Not stated    | Not stated                                                        | Not specified                                                               |

|                                                       |                      |                                                       |                                                                                                                                                                                                                                                                      |                                                                     |            |                               |            |                          |                                                                   |
|-------------------------------------------------------|----------------------|-------------------------------------------------------|----------------------------------------------------------------------------------------------------------------------------------------------------------------------------------------------------------------------------------------------------------------------|---------------------------------------------------------------------|------------|-------------------------------|------------|--------------------------|-------------------------------------------------------------------|
|                                                       |                      | action research approach                              | were interested in vocational rehabilitation. Vocational rehabilitation experts                                                                                                                                                                                      | in Gauteng public sector, 26 OT working in Academics. 39 VR experts |            |                               |            |                          |                                                                   |
| Tania Buys 2015                                       | South Africa, Africa | A Delphi technique                                    | Occupational Therapists                                                                                                                                                                                                                                              | 35                                                                  | Not stated | Not stated                    | Not stated | Not stated               | Not specified                                                     |
| Kreshnee Govender et al 2018                          | South Africa, Africa | Quantitative & Qualitative design using survey monkey | Qualified occupational therapists working in the private sector, those specializing in vocational rehabilitation in the private sector; working in health consulting and insurance sectors; occupational therapists involved in medico-legal work and work with RAF. | 180                                                                 | Not stated | Not stated                    | Not stated | Not stated               | Not specified                                                     |
| Occupational Therapy Association of South Africa 2020 | South Africa, Africa | Not stated                                            | Not stated                                                                                                                                                                                                                                                           | Not stated                                                          | Not stated | Not stated                    | Not stated | Not stated               | Injury, illness, impairment or congenital or acquired disability. |
| Madri Engelbrecht et al 2017                          | South Africa, Africa | Longitudinal descriptive design                       | Working age participants with a diagnosis of psychiatric disorder or intellectual disability                                                                                                                                                                         | Group A - 25. Group B - 56.                                         | Not stated | Working age but not specified | Urban      | Low socio-economic group | Psychiatric disability, intellectual disability.                  |
| Lana Van Niekerk et al 2011                           | South Africa, Africa | Focus group interview                                 | Service providers who had initiated SE programmes in the Cape                                                                                                                                                                                                        | 8                                                                   | Not stated | Not stated                    | Urban      | Not stated               | Not specified                                                     |
| Lana Van Niekerk et al 2015                           | South Africa, Africa | longitudinal descriptive design                       | People with mental disabilities receiving SE in the Western Cape Province                                                                                                                                                                                            | Group A 29, Group B 56.                                             | Not stated | Not stated                    | Urban      | Low socio-economic group | Intellectual disability, Psychiatric disability (Schizophrenia,   |

1  
2  
3  
4  
5  
6  
7  
8  
9  
10  
11  
12  
13  
14  
15  
16  
17  
18  
19  
20  
21  
22  
23  
24  
25  
26  
27  
28  
29  
30  
31  
32  
33  
34  
35  
36  
37  
38  
39  
40  
41  
42  
43  
44  
45  
46

|  |  |  |  |  |  |  |  |  |  |                                       |
|--|--|--|--|--|--|--|--|--|--|---------------------------------------|
|  |  |  |  |  |  |  |  |  |  | Schizoaffective disorder, Bipolar I). |
|--|--|--|--|--|--|--|--|--|--|---------------------------------------|

For peer review only

### *Level of evidence of included sources*

Levels of scientific evidence can be reliably used to summarize the quality of literature. There are five levels of scientific evidence.<sup>(30)</sup> Level 1 is the highest and it includes randomized control trials. Levels 2 and 3 include cohort and case control studies respectively, whereas level 4 encompasses non-experimental observational studies, case reports and case series.<sup>(30)</sup> Narrative reviews and expert opinions comprise the lowest level of scientific evidence i.e. level 5. In this study, one source by Vizzotto et al<sup>(22)</sup> is level 1, two sources by Engelbrecht et al<sup>(26)</sup> and van Niekerk et al<sup>(28)</sup> are level 2, and 7 sources<sup>(13,27,31–35)</sup> are level five. Two sources<sup>(29,36)</sup> did not specify methodology used.

### *Review Findings*

The section presents the scoping review findings covering VR intervention types, VR intervention principles and outcomes, and recommendations from the included sources. A summary of the review findings is attached as Annex C.

#### *Vocational Rehabilitation Intervention Types*

The included sources reported different VR types. Supported employment was the most common VR intervention cited by four sources.<sup>(29)(26)(27)(28)</sup> This is a VR intervention type that promotes the inclusion of persons with disabilities in competitive employment.<sup>(28)</sup> It is based on the assumption that people with the most severe disabilities can be integrated into competitive employment if they receive the right support.<sup>(28)</sup> The ongoing support can be provided by family members of the MHSU, the employer, occupational therapist or a job coach.<sup>(29)(28)(26)</sup>

Two sources<sup>(13)(36)</sup> categorized VR intervention types into six categories that were quite similar. These were: (i) prevention, (ii) screening, (iii) assessment, (iv) intervention, (v) placement, and (vi) follow-up. Prevention includes providing educative services for the prevention of injury at work, to create an awareness of good work practice, as well as avoiding development and/or worsening of a condition. Screening entails a short prescriptive process to filter and refer MHSUs to more specialized occupational therapists or facilities, whereas intervention services are programs aimed at correcting or compensating for ability to work deficits.<sup>(13)(36)</sup> Van Biljon et al<sup>(13)</sup> stated that placement services focus on the return of MHSUs to their own, alternative or new work area in the open labour market. Placement also include placement of MHSUs in sheltered or protected workshops.<sup>(13)</sup> Follow-up is done for MHSUs who used VR services and could be done with employers, referral sources, family members of MHSUs and MHSUs themselves.<sup>(13)</sup>

Case management and Goal Management Training (GMT) methods were also identified as possible VR intervention methods.<sup>(22)(34)</sup> Case management can be utilized as an early intervention approach in VR of MHSUs once there has been an extended period of absence from work or a high rate of absence from work due to illness.<sup>(34)</sup> It involves developing a care plan, reskilling/training to aid in work re-entry, and work visits to liaise with employer to aid in the transition of the MHSU back to work.<sup>(34)</sup> Vizzotto et al<sup>(22)</sup> tested the efficacy of Occupational Goal Intervention Method for the improvement of executive functioning in MHSUs with Treatment Resistant Schizophrenia(TRS). This intervention was delivered over 15 weeks via 30 sessions with each session lasting 90 minutes. Focus of the intervention was

1  
2  
3 on activities of daily living and instrumental activities of daily living including money  
4 management and use of transportation. Their study concluded that Occupational Goal  
5 Intervention Method appeared to improve social and functional aspects of MHSUs with TRS.  
6 Other VR intervention types identified in this review were job seeker programs and related  
7 support, prevocational skills training and support, and social networks.<sup>(35)(31)</sup>  
8  
9

### 10 *Vocational Rehabilitation Intervention Principles*

11  
12 Five out of the 12 included sources stated a number of principles applied in VR.<sup>(32)(33)(34)(27)(28)</sup>  
13 Samuel and Jacob<sup>(32)</sup> in their study on the role of occupational therapy in bridging the gap  
14 between symptomatic improvement and functional recovery highlighted the following three  
15 principles; (i) patient and family empowerment, (ii) focus on achieving functional recovery,  
16 and (iii) optimizing the fit between an individual's abilities and the environmental demands.  
17 Buys<sup>(33)</sup> identified five principles in her study on professional competencies in VR, namely;  
18 client centered, objectivity, adaptability, professionalism and respect. Planning with the client,  
19 client advocacy and on-going individualized support are the principles specifically identified  
20 for case management and supported employment.<sup>(34)(28)</sup> Van Niekerk et al<sup>(27)</sup> further reiterated  
21 the need to support MHSU goals and to empower them with choices and information, and they  
22 highlighted that support should be 'no more than needed and no less than necessary'.  
23  
24  
25

### 26 *Vocational Rehabilitation Intervention Strategies*

27  
28 All 12 included sources presented various VR intervention strategies. Khare et al<sup>(29)</sup> identified  
29 the following strategies; teaching illness self-management skills, systematic involvement of  
30 families and social networks to help with job finding, collaboration on mental illness  
31 management, and facilitating work in family business. Van Niekerk et al<sup>(27)</sup> and Engelbrecht  
32 et al<sup>(26)</sup> reported similar VR intervention strategies in their studies. These were job analysis and  
33 matching, job finding, job coaching, trial placement, simulated work, work in protective  
34 factories and sheltered workshops. Job analysis and matching involves evaluation of  
35 employment potential and goodness of job fit. Job advocacy at the job site with employers and  
36 co-workers was a strategy utilized in supported employment. Work visits were done to observe  
37 real work, to discuss reasonable accommodation and to assist with performance appraisals.  
38 Engelbrecht et al<sup>(26)</sup> further identified personal life skills training as an essential component of  
39 VR strategy. The personal life skills deemed essential in VR included money handling,  
40 grooming, use of transportation, time management and communication.  
41  
42  
43  
44

45 The Occupational Therapy Association of South Africa (OTASA)<sup>(36)</sup> position paper on VR  
46 stated a number of VR strategies that are applicable in various settings including mental  
47 healthcare settings. These strategies include sheltered workshops, entrepreneurship and self-  
48 employment initiatives, vocational guidance and counseling, as well as work adaptation. In  
49 addition, Buys<sup>(33)</sup> identified the following VR strategies, job description review, work  
50 hardening, work conditioning, stress management and job seeking skills training.  
51  
52

### 53 *Vocational Rehabilitation Intervention Outcomes*

54  
55 VR intervention outcomes were reported for Supported Employment and Occupational Goal  
56 Intervention Method. Participants who engaged in supported employment earned more and  
57 worked more hours per month than those who had had prevocational training.<sup>(27)</sup> More so,  
58 supported employed allowed MHSUs to integrate into mainstream society, provided income  
59 and arena for social and personal development including improved self-esteem. Improved  
60

1  
2  
3 income lessens the economic burden for government. Reduction in the consumption of mental  
4 health services was reported for MHSUs who entered employment.<sup>(26)</sup> A study by Adriana et  
5 al<sup>(22)</sup> showed that Occupational Goal Intervention Method appeared to improve social and  
6 functional aspects of patients with Treatment Resistant Schizophrenia.  
7

### 8 9 *Summary of conclusions and recommendations*

10 Overall the included sources emphasized the need for contextually relevant vocational  
11 rehabilitation practice and advocated for the adoption of supported employment VR  
12 intervention for MHSUs. Van Biljon et al<sup>(35)</sup> concluded in their study by stating that having a  
13 comprehensive and contextually relevant tool that effectively indicate what VR services look  
14 like will be helpful to occupational therapists offering VR services in both public healthcare  
15 and in private practices. Khare et al<sup>(29)</sup> suggested in their conclusion that attention should be  
16 paid to adapting models of VR to the cultural context of developing countries to improve the  
17 employment outcomes of persons with serious mental illness. Buys<sup>(33)</sup> asserted the need for the  
18 occupational therapy profession to ensure that it provides competent, professional and  
19 contextually relevant VR services to clients which enables them to fulfil their roles as  
20 independent citizens. Similarly, the OTASA<sup>(36)</sup> position paper on VR concluded that the type  
21 of VR service that occupational therapists in South Africa offer should be dictated by the  
22 vocational needs and aspirations, social structures and contextual realities of MHSUs.  
23

24 Three of the included sources concluded by advocating for supported employment as a model  
25 of choice in VR<sup>(26)(27)(28)</sup>. Engelbrecht et al<sup>(26)</sup> concluded that supported employment is cost  
26 effective and will combat unemployment, work towards poverty reduction and redress  
27 inequality for people with mental disabilities, hence it is a viable strategy for return to work  
28 endeavors. In addition to proposing supported employment as a model of choice to drive the  
29 process of economic empowerment for persons facing disabling conditions, van Niekerk et  
30 al<sup>(27)</sup> recommended a holistic approach to supported employment because it has components  
31 such as placement in suitable work and reasonable accommodation that do not necessarily  
32 follow a linear process. Van Niekerk<sup>(28)</sup> recommended the need for providers of supported  
33 employment to modify approaches in order to meet contextual realities.  
34

## 35 36 37 38 39 40 **Discussion**

41 This study set out to scope the literature on VR for MHSUs with chronic mental illness, in  
42 occupational therapy, produced in L-UMICs. The study further identified the different types,  
43 principles and strategies of institution-based VR interventions for MHSUs. Types of vocational  
44 rehabilitation intervention identified included supported employment, case management and  
45 prevocational skills training. Client centeredness, support and empowerment were the key  
46 vocational rehabilitation principles identified. Teaching illness self-management, job analysis  
47 and matching, job coaching, trial placement, and vocational guidance and counseling, and work  
48 hardening were the main intervention strategies reported.  
49

50 Overall, the majority of included sources were from South Africa with only one source from  
51 Kenya completing the representation from African continent. Only two sources from India and  
52 one from Brazil represented the Asian and South American continents respectively. The low  
53 number of sources possibly confirm limited research in the field of VR for MHSUs with  
54 chronic mental illness in L-UMIC, which could be attributed to a couple of factors. There is a  
55 high patient-therapist ratio in the field of mental health in L-UMICs, thus occupational  
56  
57  
58  
59  
60

1  
2  
3 therapists do not have sufficient time and skills to document and publish their work. Another  
4 possible contributing factor to low number of sources could be the limited resources such as  
5 funding, publishing journals and tertiary institutions providing occupational therapy training.  
6 As a result, occupational therapists cannot afford the cost of publishing in journals from high  
7 income countries and they lack academic support to help with their academic writing skills and  
8 ethical clearance for their research.  
9  
10

11 The main VR types identified in African and Asian sources were supported employment, case  
12 management, prevocational and vocational skills training. Goal Management Training  
13 Method<sup>(22)</sup> was the only intervention type identified from the one included source from South  
14 American continent. Using the categorization of VR types suggested by Van Biljon et al<sup>(13)</sup>,  
15 supported employment fits in two categories, intervention and placement. Prevocational and  
16 vocational skills training fall under traditional VR intervention, which is a stepwise path that  
17 focuses on assessment and job matching prior to job search.<sup>(37)</sup> The included sources did not  
18 specify institution-based VR interventions. One possible reason for this observation could be  
19 due to the current set-up of occupational therapy practice in L-UMIC. Occupational therapists  
20 tend to be institution based regardless of the VR intervention type that they provide. Also,  
21 institution-based VR in L-UMIC lack human and capital resources such as therapists and  
22 transport needed to move beyond the institutions. Generally, due to a variety of reasons as  
23 alluded above, there is dearth of documented evidence supporting occupational therapists  
24 involvement in VR.<sup>(38)</sup>  
25  
26  
27  
28

29 Vocational rehabilitation intervention principles identified in this review focused on client  
30 centredness, achieving functional recovery, as well as advocating for client and family support.  
31 These principles are well enshrined within the general occupational therapy intervention  
32 principles. Client centredness is a key element of occupational therapy practice that demands  
33 for the formation of partnerships with MHSUs, which allows for the exploration,  
34 understanding, and promotion of engagement in their chosen or expected occupations  
35 including work<sup>(39)</sup>. Applying the principle of client centredness in VR intervention five rules  
36 should be considered based on a framework suggested by Gretschel and Galvaan.<sup>(39)</sup> MHSUs  
37 should be considered holistically, they should be viewed as experts of their own occupational  
38 engagement, their values and goals must be respected, therapist-person partnerships should be  
39 facilitative and not directive, and contextual congruence must be inherent in the VR  
40 interventions designed.<sup>(39)</sup> Supportive relationship is another VR principle that is integral to the  
41 success of VR interventions. Occupational therapists, employers, coworkers and family  
42 members provide hope, empathy and encouragement, all resulting in enhanced confidence at  
43 work, increased work-related skills and greater ability of MHSUs to fit within a particular  
44 work/employment situation.<sup>(40)</sup> Also, given the reality that mental disability tends to be  
45 episodic and fluctuates over time, and due to limited understanding of mental illness in L-  
46 UMICs, it is imperative that VR intervention is structured to offer on-going support in and  
47 beyond institution boundaries.<sup>(11)</sup>  
48  
49  
50  
51  
52

53 Regarding VR intervention strategies, the included sources clearly focused on simultaneously  
54 placing MHSUs in competitive work and providing support through networks and negotiating  
55 with employer and managing symptoms. This highlights a shift from the traditional VR  
56 strategies which focus on train-first-then-place. However, this strategy may pose a challenge  
57 in L-UMICs where unemployment rates are high resulting in MHSUs competing for  
58 employment with the mainstream community.<sup>(12)</sup> Self-employment initiatives is therefore a  
59  
60



1  
2  
3 realistic VR intervention strategy.<sup>(38)</sup> Occupational therapists are sufficiently skilled to  
4 facilitate self-employment, and can contribute towards alleviating unemployment among  
5 MHSUs with chronic mental illness by identifying potential and encouraging entrepreneurship  
6 and self-employment opportunities.<sup>(38)</sup> Swart and Buys<sup>(11)</sup> contend that in addition to the  
7 various VR intervention strategies that occupational therapists utilize, traditional psychosocial  
8 intervention such as stress management, conflict management and relaxation therapy should  
9 be considered depending on client needs.  
10  
11

### 12 Implication for Research

13 The findings of the scoping review provide the authors with thematic areas to consider when  
14 developing the semi-structured interview guide that will be utilized to explore factors to be  
15 considered for VR intervention in the Namibian context. The proposed thematic areas are; (i)  
16 VR interventions applicable to Namibia context, (ii) VR principles to be applied, (iii) VR  
17 intervention strategies, (iv) VR stakeholders to be engaged in Namibia including their roles,  
18 and (v) general recommendations for the implementation of VR in Namibia for MHSUs with  
19 chronic mental illness.  
20  
21  
22

### 23 Implication for Practice

24 In terms of occupational therapy practice in VR, the findings of this review highlight the need  
25 to shift from the current practice to *place and train* models in L-UMIC. Institution based VR  
26 should take shorter time compared to the traditional VR approach and rather focus on  
27 identifying potential areas for placement and support in the natural work contexts for MHSUs.  
28 In the context of L-UMICs where unemployment rates are high, VR intervention may need to  
29 focus on strategies that support self-employment initiatives. Client centeredness is a key  
30 principle in planning for VR interventions and ensuring that intended VR outcomes are  
31 achieved. There is a need for occupational therapists to have insight into and adapt vocational  
32 rehabilitation intervention strategies to the demographic and socio-economic context of the L-  
33 UMIC in which they practice.<sup>(38)</sup> Occupational therapists and other VR stakeholders should  
34 provide the right level of individual support to MHSUs in VR and be able to adapt this support  
35 according to the needs of the client.  
36  
37  
38  
39

### 40 Strengths and Limitations

#### 41 Strengths

42  
43 *The study followed a scoping review protocol<sup>(1)</sup> that was peer reviewed and published in BMJ*  
44 *Open on 14 July 2021. Pre-scheduled weekly meetings among the three authors were used to*  
45 *promote momentum and discussions throughout the project. Also, the authors used human and*  
46 *other library resources from two different universities, University of Namibia and Stellenbosch*  
47 *University.*  
48 *Limitations*  
49

50 Sources published in non-English languages were excluded from this review, therefore the  
51 authors concede that sources from L-UMIC in languages such as Spanish could have been  
52 missed. Due to the dearth of publications from L-UMIC the evidence presented in this article  
53 cannot be seen to represent VR for MHSUs in occupational therapy globally. No quality  
54 appraisal was done on the included sources.  
55  
56  
57  
58

### 59 Conclusion

1  
2  
3 This review mapped the current evidence in VR for MHSUs with chronic mental illness in L-  
4 UMICs. Review findings indicate the need for institution based occupational therapists in L-  
5 UMICs to shift from a traditional vocational rehabilitation approach to interventions that do  
6 not cease upon discharge but include place-train-and-support approaches. VR interventions  
7 should extend their focus on supporting MHSUs in their natural work settings or potential work  
8 settings. Such intervention should include factors such as getting to and from work, job seeking  
9 skills, upskilling within the larger labour market, and it should include placement  
10 considerations such as self-employment and unpaid work. The authors recommend further  
11 studies on VR interventions and outcomes for MHSUs in low resourced communities focusing  
12 on practical and unique realities experienced by such communities. More so, it is imperative  
13 that researchers in the field of occupational therapy, mental health and VR strive for levels 1  
14 and 2 of scientific evidence to inform practice.  
15  
16  
17  
18

### 19 **Author Contributions**

20 Three authors were involved in conceptualizing, drafting and editing this scoping review. The  
21 first author, Munyaradzi Chimara, conducted this scoping review as part of his doctoral studies.  
22 Second and third authors, Professor Lana van Niekerk and Dr Hester Maria van Biljon  
23 respectively, were involved as academic supervisors in all the stages followed in this scoping  
24 review study.  
25  
26

### 27 **Funding**

28 At the time of submission, no funding was received from any agency or organisation for  
29 supporting this research.  
30  
31  
32

### 33 **Competing interest statement**

34 The authors hereby declare that there is no conflict of interest from the publication of this paper.  
35  
36

### 37 **Data availability statement**

38 No additional data are available  
39  
40

### 41 **List of Figures**

42 Figure 1: PRISMA Flow Diagram  
43  
44

### 45 **References**

- 46 1. Chimara M, Van Niekerk L, Van Biljon HM. Vocational rehabilitation for mental health  
47 service users with chronic mental illness in low-income to upper-middle-income  
48 countries: a scoping review protocol. *BMJ Open*. 2021;1–6.
- 49 2. Patel V. Mental health in low- and middle-income countries. *Br Med Bull*. 2007;81–  
50 82(1):81–96.
- 51 3. Chibanda D. The future of psychiatry in Africa—thinking outside the box. *The Lancet*  
52 *Psychiatry*. 2017;4(10):741–2.
- 53 4. World Health Organisation. *Mental health atlas 2017*. Geneva; 2018.
- 54 5. Nguyen T, Holton S, Tran T, Fisher J. Informal mental health interventions for people  
55 with severe mental illness in low and lower middle-income countries: A systematic  
56  
57  
58  
59  
60

- review of effectiveness. *Int J Soc Psychiatry*. 2019;65(3):194–206.
6. World Bank. World Bank Country and Lending Groups [Internet]. World Bank Group. 2021 [cited 2021 Sep 21]. Available from: <https://datahelpdesk.worldbank.org/knowledgebase/articles/906519-world-bank-country-and-lending-groups>
  7. Bachrach, Leona L. Defining chronic mental illness.pdf. *Am Psychiatry Assoc*. 1988;39(4):383–8.
  8. American Psychiatric Association. Diagnostic and statistical manual of mental disorders. Fifth. Washington, London; 2013.
  9. Swart L, Buys T. Vocational Rehabilitation in Psychiatry and Mental Health. In: Crouch R, Alers V, editors. *Occupational Therapy in Psychiatry and Mental Health*. Fifth. Chichester: Wiley Blackwell; 2014. p. 175–93.
  10. Ross J. *Occupational Therapy and Vocational Rehabilitation*. West Sussex: John Wiley & Sons; 2007.
  11. Swart L, Buys T. Vocational Rehabilitation in Psychiatry and Mental Health. In: *Occupational Therapy in Psychiatry and Mental Health*. 2014. p. 175–93.
  12. Namibian Statistics Agency. The Namibia Labour Force Survey 2014 Report [Internet]. Windhoek; 2019. Available from: [http://www.ilo.org/wcmsp5/groups/public/---africa/--ro-addis\\_ababa/---ilo-pretoria/documents/publication/wcms\\_368595.pdf](http://www.ilo.org/wcmsp5/groups/public/---africa/--ro-addis_ababa/---ilo-pretoria/documents/publication/wcms_368595.pdf)
  13. van Biljon HM, Casteljiën D, J du Toit SH, Soulsby L. Opinions of occupational therapists on the positioning of vocational rehabilitation services in Gauteng Public Healthcare. *South African J Occup Ther*. 2016;46(1):45–52.
  14. Suijkerbuijk YB, Schaafsma FG, van Mechelen JC, Ojajärvi A, Corbière M, Anema JR. Interventions for obtaining and maintaining employment in adults with severe mental illness, a network meta-analysis. *Cochrane Database Syst Rev* [Internet]. 2017;(9). Available from: <http://dx.doi.org/10.1002/14651858.CD011867.pub2>
  15. Clubhouse International. How clubhouses work [Internet]. Clubhouse International. 2021. Available from: <https://clubhouse-intl.org/resources/how-clubhouses-work/>
  16. Lloyd C. Vocational rehabilitation and mental health [Internet]. Vol. 369, *Journal of Petrology*. Wiley Blackwell; 2010. 1689–1699 p. Available from: <http://dx.doi.org/10.1016/j.jsames.2011.03.003><https://doi.org/10.1016/j.gr.2017.08.001><http://dx.doi.org/10.1016/j.precamres.2014.12.018><http://dx.doi.org/10.1016/j.precamres.2011.08.005><http://dx.doi.org/10.1080/00206814.2014.902757><http://dx.doi.org/10.1016/j.jclinepi.2014.03.013>
  17. Arksey H, O'Malley L. Scoping studies: Towards a methodological framework. *Int J Soc Res Methodol Theory Pract*. 2005;8(1):19–32.
  18. Levac D, Colquhoun H, O'Brien KK, Brien KKO. Scoping studies: advancing the methodology. *Implement Sci*. 2010;1–18.
  19. Colquhoun HL, Levac D, O'Brien KK, Straus S, Tricco AC, Perrier L, et al. Scoping reviews: Time for clarity in definition, methods, and reporting. *J Clin Epidemiol* [Internet]. 2014;67(12):1291–4. Available from: <http://dx.doi.org/10.1016/j.jclinepi.2014.03.013>

- 1
  - 2
  - 3
  - 4
  - 5
  - 6
  - 7
  - 8
  - 9
  - 10
  - 11
  - 12
  - 13
  - 14
  - 15
  - 16
  - 17
  - 18
  - 19
  - 20
  - 21
  - 22
  - 23
  - 24
  - 25
  - 26
  - 27
  - 28
  - 29
  - 30
  - 31
  - 32
  - 33
  - 34
  - 35
  - 36
  - 37
  - 38
  - 39
  - 40
  - 41
  - 42
  - 43
  - 44
  - 45
  - 46
  - 47
  - 48
  - 49
  - 50
  - 51
  - 52
  - 53
  - 54
  - 55
  - 56
  - 57
  - 58
  - 59
  - 60
20. Tricco AC, Lillie E, Zarin W, O'Brien KK, Colquhoun H, Levac D, et al. PRISMA Extension for Scoping Reviews (PRISMA-ScR): Checklist and Explanation. *Ann Intern Med* [Internet]. 2018; Available from: <http://annals.org/article.aspx?doi=10.7326/M18-0850>
21. Institute TJB. The Joanna Briggs Institute Reviewers' Manual 2015 Methodology for JBI Scoping Reviews [Internet]. The Joanna Briggs Institute; 2015. Available from: [www.joanabriggs.org](http://www.joanabriggs.org)
22. Vizzotto ADB, Celestino DL, Buchain PC, Oliveira AM, Oliveira GMR, Di Sarno ES, et al. A pilot randomized controlled trial of the Occupational Goal Intervention method for the improvement of executive functioning in patients with treatment-resistant schizophrenia. *Psychiatry Res* [Internet]. 2016;245(April):148–56. Available from: <http://dx.doi.org/10.1016/j.psychres.2016.05.011>
23. Mendeley. Mendeley Reference Manager. Elsevier; 2020.
24. Mourad O, Hossam H, Zbys F, Ahmed E. Rayyan Intelligent Systematic Review. 2020.
25. Hoffmann TC, Glasziou PP, Boutron I, Milne R, Perera R, Moher D, et al. Better reporting of interventions: Template for intervention description and replication (TIDieR) checklist and guide. *BMJ* [Internet]. 2014;348(March):1–12. Available from: <http://dx.doi.org/doi:10.1136/bmj.g1687>
26. Engelbrecht M, Uct OT, Ot B, Coetzee Z, Ot ND, Uct OT, et al. Supported Employment for people with mental disabilities in South Africa: cost calculation of service utilisation. 2017;47(2):11–6.
27. Van Niekerk L, Coetzee Z, Engelbrecht M, Hajwani Z, Landman S, Motimele M, et al. Supported employment: Recommendations for successful implementation in South Africa. *Support Employ Recomm Success Implement South Africa*. 2011;41(3):85–90.
28. Van Niekerk L, Coetzee Z, Engelbrecht M, Hajwani Z, Terreblanche S. Time utilisation trends of supported employment services by persons with mental disability in South Africa. *Work*. 2015;52(4):825–33.
29. Khare C, Mueser KT, Fulford D, Watve VG, Karandikar NJ, Khare S, et al. Employment functioning in people with severe mental illnesses living in urban vs. rural areas in India. *Soc Psychiatry Psychiatr Epidemiol* [Internet]. 2020;55(12):1593–606. Available from: <https://www.scopus.com/inward/record.uri?eid=2-s2.0-85086778582&doi=10.1007%2Fs00127-020-01901-0&partnerID=40&md5=6069171aa788c101228e8e27298643f8>
30. Bowen DM., Forrest JL. Translating Research for Evidence-Based Practice.: EBSCOhost. 2017;(February). Available from: <https://web-b-ebSCOhost-com.lopes.idm.oclc.org/ehost/pdfviewer/pdfviewer?vid=1&sid=f204616b-9cae-42e5-a8c2-7175df7b56ad%40sessionmgr101>
31. Ebuenyi I. Inclusive employment: understanding the barriers to and facilitators of employment for persons with mental disability in East Africa [Internet]. 2019. Available from: [https://research.vu.nl/files/87463718/complete\\_dissertation.pdf](https://research.vu.nl/files/87463718/complete_dissertation.pdf)
32. Samuel R, Jacob KS. Occupational therapy in India: Focus on functional recovery and need for empowerment. *Indian J Psychiatry*. 2018;59(4):2017–8.
33. Buys T. Professional competencies in vocational rehabilitation: Results of a Delphi

- 1  
2  
3 study. *South African J Occup Ther.* 2015;45(3):48–54.  
4  
5 34. Govender K, Christopher C, Lingah T. The role of the occupational therapist in case  
6 management in South Africa. *South African J Occup Ther.* 2018;48(2):12–9.  
7  
8 35. Biljon H Van, Ufs BOT, Ufs MOT, Pret MOT. An Action Research Approach to Profile  
9 an Occupational Therapy VR SERVICE IN PUBLIC HEALTHCARE. 2015;45(3):40–  
10 7.  
11  
12 36. OTASA. Position Statement on Vocational Rehabilitation. *South African J Occup Ther.*  
13 2017;47(3):63–4.  
14  
15 37. Vukadin M, Schaafsma FG, Vlaar SJ, van Busschbach JT, van de Ven PM, Michon  
16 HWC, et al. Work Motivation and Employment Outcomes in People with Severe Mental  
17 Illness. *J Occup Rehabil* [Internet]. 2019;29(4):803–9. Available from:  
18 [https://www.scopus.com/inward/record.uri?eid=2-s2.0-](https://www.scopus.com/inward/record.uri?eid=2-s2.0-85066785183&doi=10.1007%2Fs10926-019-09839-0&partnerID=40&md5=4914cf2e4cb7005000d27385ac9c8f71)  
19 [85066785183&doi=10.1007%2Fs10926-019-09839-](https://www.scopus.com/inward/record.uri?eid=2-s2.0-85066785183&doi=10.1007%2Fs10926-019-09839-0&partnerID=40&md5=4914cf2e4cb7005000d27385ac9c8f71)  
20 [0&partnerID=40&md5=4914cf2e4cb7005000d27385ac9c8f71](https://www.scopus.com/inward/record.uri?eid=2-s2.0-85066785183&doi=10.1007%2Fs10926-019-09839-0&partnerID=40&md5=4914cf2e4cb7005000d27385ac9c8f71)  
21  
22 38. Monareng LL, Franzsen D, van Biljon H. A survey of occupational therapists’  
23 involvement in facilitating self-employment for people with disabilities. *South African*  
24 *J Occup Ther.* 2018;48(3):52–7.  
25  
26 39. Gretschel P, Galvaan R. Using a client-centred approach in occupational therapy. In:  
27 Dsouza SA, Gailvaan R, Ramugondo EL, editors. *Concepts in Occupational Therapy*  
28 *Understanding Southern Perspectives*. First. Manipal: Manipal University Press; 2017.  
29 p. 237–47.  
30  
31 40. Dunn EC, Wewiorski NJ, Rogers ES. A qualitative investigation of individual and  
32 contextual factors associated with vocational recovery among people with serious  
33 mental illness. *Am J Orthopsychiatry.* 2010;80(2).  
34  
35  
36  
37  
38  
39  
40  
41  
42  
43  
44  
45  
46  
47  
48  
49  
50  
51  
52  
53  
54  
55  
56  
57  
58  
59  
60

Figure 1; PRISMA flow diagram

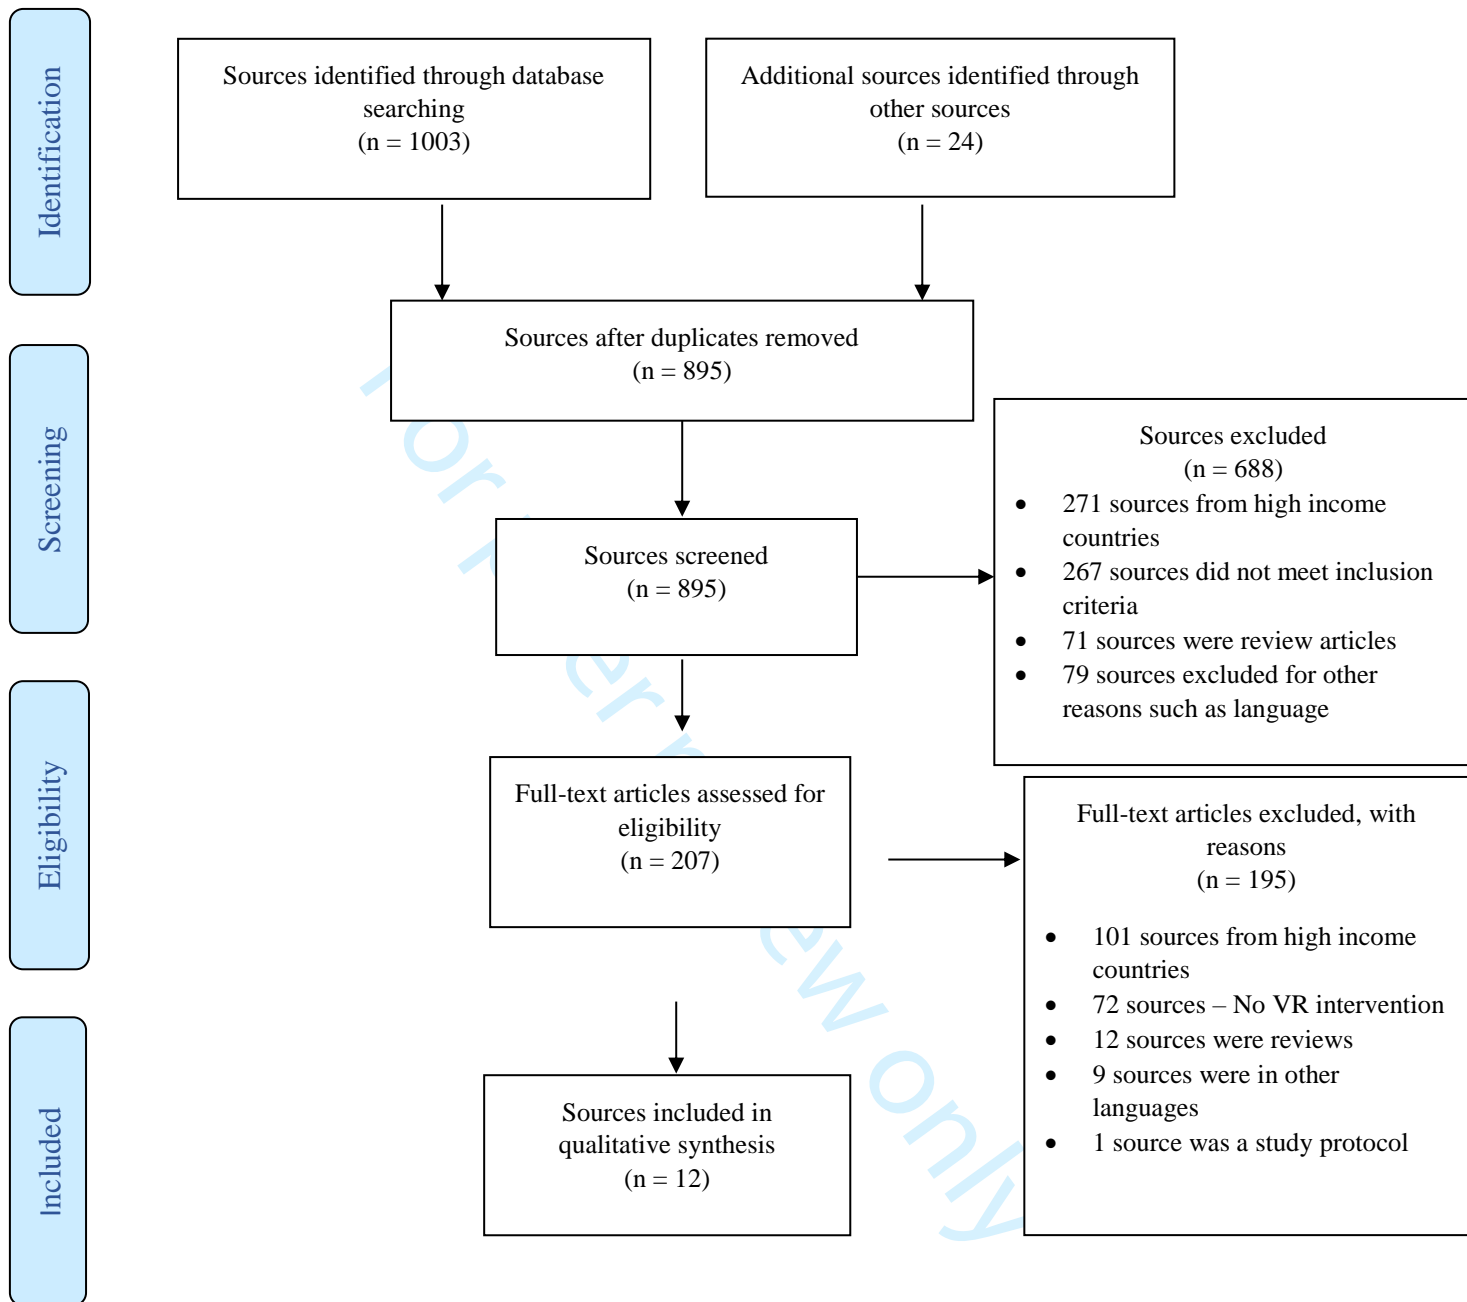

Prisma flow diagram for a scoping review exploring vocational rehabilitation interventions for mental health service users with chronic mental illness in low-income to upper-middle-income countries.

## Preferred Reporting Items for Systematic reviews and Meta-Analyses extension for Scoping Reviews (PRISMA-ScR) Checklist

| SECTION                                               | ITEM | PRISMA-ScR CHECKLIST ITEM                                                                                                                                                                                                                                                                                  | REPORTED ON PAGE # |
|-------------------------------------------------------|------|------------------------------------------------------------------------------------------------------------------------------------------------------------------------------------------------------------------------------------------------------------------------------------------------------------|--------------------|
| <b>TITLE</b>                                          |      |                                                                                                                                                                                                                                                                                                            |                    |
| Title                                                 | 1    | Identify the report as a scoping review.                                                                                                                                                                                                                                                                   |                    |
| <b>ABSTRACT</b>                                       |      |                                                                                                                                                                                                                                                                                                            |                    |
| Structured summary                                    | 2    | Provide a structured summary that includes (as applicable): background, objectives, eligibility criteria, sources of evidence, charting methods, results, and conclusions that relate to the review questions and objectives.                                                                              |                    |
| <b>INTRODUCTION</b>                                   |      |                                                                                                                                                                                                                                                                                                            |                    |
| Rationale                                             | 3    | Describe the rationale for the review in the context of what is already known. Explain why the review questions/objectives lend themselves to a scoping review approach.                                                                                                                                   |                    |
| Objectives                                            | 4    | Provide an explicit statement of the questions and objectives being addressed with reference to their key elements (e.g., population or participants, concepts, and context) or other relevant key elements used to conceptualize the review questions and/or objectives.                                  |                    |
| <b>METHODS</b>                                        |      |                                                                                                                                                                                                                                                                                                            |                    |
| Protocol and registration                             | 5    | Indicate whether a review protocol exists; state if and where it can be accessed (e.g., a Web address); and if available, provide registration information, including the registration number.                                                                                                             |                    |
| Eligibility criteria                                  | 6    | Specify characteristics of the sources of evidence used as eligibility criteria (e.g., years considered, language, and publication status), and provide a rationale.                                                                                                                                       |                    |
| Information sources*                                  | 7    | Describe all information sources in the search (e.g., databases with dates of coverage and contact with authors to identify additional sources), as well as the date the most recent search was executed.                                                                                                  |                    |
| Search                                                | 8    | Present the full electronic search strategy for at least 1 database, including any limits used, such that it could be repeated.                                                                                                                                                                            |                    |
| Selection of sources of evidence†                     | 9    | State the process for selecting sources of evidence (i.e., screening and eligibility) included in the scoping review.                                                                                                                                                                                      |                    |
| Data charting process‡                                | 10   | Describe the methods of charting data from the included sources of evidence (e.g., calibrated forms or forms that have been tested by the team before their use, and whether data charting was done independently or in duplicate) and any processes for obtaining and confirming data from investigators. |                    |
| Data items                                            | 11   | List and define all variables for which data were sought and any assumptions and simplifications made.                                                                                                                                                                                                     |                    |
| Critical appraisal of individual sources of evidence§ | 12   | If done, provide a rationale for conducting a critical appraisal of included sources of evidence; describe the methods used and how this information was used in any data synthesis (if appropriate).                                                                                                      |                    |
| Synthesis of results                                  | 13   | Describe the methods of handling and summarizing the data that were charted.                                                                                                                                                                                                                               |                    |

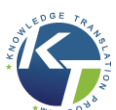

| SECTION                                       | ITEM | PRISMA-ScR CHECKLIST ITEM                                                                                                                                                                       | REPORTED ON PAGE # |
|-----------------------------------------------|------|-------------------------------------------------------------------------------------------------------------------------------------------------------------------------------------------------|--------------------|
| <b>RESULTS</b>                                |      |                                                                                                                                                                                                 |                    |
| Selection of sources of evidence              | 14   | Give numbers of sources of evidence screened, assessed for eligibility, and included in the review, with reasons for exclusions at each stage, ideally using a flow diagram.                    |                    |
| Characteristics of sources of evidence        | 15   | For each source of evidence, present characteristics for which data were charted and provide the citations.                                                                                     |                    |
| Critical appraisal within sources of evidence | 16   | If done, present data on critical appraisal of included sources of evidence (see item 12).                                                                                                      |                    |
| Results of individual sources of evidence     | 17   | For each included source of evidence, present the relevant data that were charted that relate to the review questions and objectives.                                                           |                    |
| Synthesis of results                          | 18   | Summarize and/or present the charting results as they relate to the review questions and objectives.                                                                                            |                    |
| <b>DISCUSSION</b>                             |      |                                                                                                                                                                                                 |                    |
| Summary of evidence                           | 19   | Summarize the main results (including an overview of concepts, themes, and types of evidence available), link to the review questions and objectives, and consider the relevance to key groups. |                    |
| Limitations                                   | 20   | Discuss the limitations of the scoping review process.                                                                                                                                          |                    |
| Conclusions                                   | 21   | Provide a general interpretation of the results with respect to the review questions and objectives, as well as potential implications and/or next steps.                                       |                    |
| <b>FUNDING</b>                                |      |                                                                                                                                                                                                 |                    |
| Funding                                       | 22   | Describe sources of funding for the included sources of evidence, as well as sources of funding for the scoping review. Describe the role of the funders of the scoping review.                 |                    |

JBI = Joanna Briggs Institute; PRISMA-ScR = Preferred Reporting Items for Systematic reviews and Meta-Analyses extension for Scoping Reviews.

\* Where *sources of evidence* (see second footnote) are compiled from, such as bibliographic databases, social media platforms, and Web sites.

† A more inclusive/heterogeneous term used to account for the different types of evidence or data sources (e.g., quantitative and/or qualitative research, expert opinion, and policy documents) that may be eligible in a scoping review as opposed to only studies. This is not to be confused with *information sources* (see first footnote).

‡ The frameworks by Arksey and O'Malley (6) and Levac and colleagues (7) and the JBI guidance (4, 5) refer to the process of data extraction in a scoping review as data charting.

§ The process of systematically examining research evidence to assess its validity, results, and relevance before using it to inform a decision. This term is used for items 12 and 19 instead of "risk of bias" (which is more applicable to systematic reviews of interventions) to include and acknowledge the various sources of evidence that may be used in a scoping review (e.g., quantitative and/or qualitative research, expert opinion, and policy document).

From: Tricco AC, Lillie E, Zarin W, O'Brien KK, Colquhoun H, Levac D, et al. PRISMA Extension for Scoping Reviews (PRISMA-ScR): Checklist and Explanation. *Ann Intern Med.* 2018;169:467–473. doi: [10.7326/M18-0850](https://doi.org/10.7326/M18-0850).





## Annex B – Search Strategy Summary for the Scoping Review

|                                                    |                                                                                                                                                                                                                                                                                                                                                                                                               |
|----------------------------------------------------|---------------------------------------------------------------------------------------------------------------------------------------------------------------------------------------------------------------------------------------------------------------------------------------------------------------------------------------------------------------------------------------------------------------|
| Period search was conducted                        | 15 July 2021 to 31 August 2021                                                                                                                                                                                                                                                                                                                                                                                |
| Inclusion criteria                                 | <ul style="list-style-type: none"> <li>• Mental Health Service User</li> <li>• Psychiatric patients</li> <li>• Chronic mental illness</li> <li>• Vocational rehabilitation</li> <li>• Psychosocial rehabilitation</li> <li>• Occupational therapy</li> <li>• Low-income, low-middle- income and upper-middle-income countries</li> <li>• English language</li> <li>• Published from 2011 and later</li> </ul> |
| Exclusion criteria                                 | <ul style="list-style-type: none"> <li>• Systematic and scoping reviews</li> <li>• Source published in other languages, not English.</li> <li>• Sources published prior to 2011.</li> <li>• Sources from high-income countries</li> <li>• Full-text not available</li> </ul>                                                                                                                                  |
| Libraries                                          | Worldwide                                                                                                                                                                                                                                                                                                                                                                                                     |
| Pubmed, Medline, CINAHL, PsycInfo, Science Direct, | "Mental disorders"[MESH] AND (Severe OR Chronic OR long-term OR persistent) AND ("Psychiatric Rehabilitation"[Mesh]) OR "Rehabilitation, Vocational"[Mesh] OR "work rehabilitation" OR "Occupational Therapy"[MESH])                                                                                                                                                                                          |
| Google Scholar, HINARI and Wiley online            | ("Vocational Rehab"* OR "Work Rehab*") AND ("Severe mental illness" OR "Chronic Mental illness") AND "Occupational Therapy" NOT ("North America" or Europe*)                                                                                                                                                                                                                                                  |
| EBSCOhost, Cochrane library, Scopus,               | ( ("Psychiatric Rehabilitation" OR "Rehabilitation, Vocational" OR "work rehabilitation" OR "Occupational Therapy" ) AND ( mental disorders OR mental illness OR psychiatric disorders OR psychiatric illness ) NOT ( ("North America" OR Europe* ) ) AND ( (severe OR chronic OR long-term OR persistent) ).                                                                                                 |
| Grey Literature Sources                            | <a href="https://libguides.sun.ac.za/medicine/e-theses">https://libguides.sun.ac.za/medicine/e-theses</a><br><a href="https://wiki.lib.sun.ac.za/index.php/SUNScholar/Completed_theses_and_dissertations">https://wiki.lib.sun.ac.za/index.php/SUNScholar/Completed_theses_and_dissertations</a>                                                                                                              |

## Summary of Findings

| Authors & year of publication     | Title                                                                                                                                                                            | Aim of Study                                                                                                                                                                        | Type of Mental Healthcare Institution                                                                                                    | VR Intervention Type(s)                                                                                     | Duration of Intervention                      | VR Intervention Principles | VR Intervention Strategies                                                                                                                                                                                                                                                                       | VR Intervention outcomes                                                                                                                                                                                                                                                                                                                                                                                                                                                                                                                                                                   | Main Conclusion                                                                                                                                                                                                                                                                                                                                                                                                                            |
|-----------------------------------|----------------------------------------------------------------------------------------------------------------------------------------------------------------------------------|-------------------------------------------------------------------------------------------------------------------------------------------------------------------------------------|------------------------------------------------------------------------------------------------------------------------------------------|-------------------------------------------------------------------------------------------------------------|-----------------------------------------------|----------------------------|--------------------------------------------------------------------------------------------------------------------------------------------------------------------------------------------------------------------------------------------------------------------------------------------------|--------------------------------------------------------------------------------------------------------------------------------------------------------------------------------------------------------------------------------------------------------------------------------------------------------------------------------------------------------------------------------------------------------------------------------------------------------------------------------------------------------------------------------------------------------------------------------------------|--------------------------------------------------------------------------------------------------------------------------------------------------------------------------------------------------------------------------------------------------------------------------------------------------------------------------------------------------------------------------------------------------------------------------------------------|
| Adriana D.B. Vizzotto et al. 2016 | A pilot randomized controlled trial of the Occupational Goal Intervention method for the improvement of executive functioning in patients with treatment-resistant schizophrenia | To test the efficacy of the Occupational Goal Intervention (OGI) method for the improvement of EF in patients with TRS.                                                             | Schizophrenia Research Program of the institute of psychiatry - University of Sao Paulo School of Medicine. (Sao Paulo General Hospital) | Goal Management Training (GMT) method                                                                       | 15 weeks, 30 sessions, 90 minutes per session | Not stated                 | In the OGI group, the initial sessions targeted ADL (personal hygiene), followed by IADL (housework, money management, and use of transportation), social activities, and leisure. Each patient was given four homework assignments in order to practice the daily living tasks they had learned | Outcome measures correlate significantly with the total PANSS score, showing that the degree of severity of schizophrenia is inversely related to the improvement of EF (BADs), Functional Outcome (DAFS-BR) and patient autonomy (ILSS-BR). With regards to effect analysis, over the course of the study period, there were no major changes regarding the clinical stability of the patients. Results suggest that the use of the OGI method is an effective strategy that can benefit patients with TRS. As expected, outcome measures were shown to be significantly intercorrelated. | "The OGI method has been shown to be reliable and effective for patients with TRS. In addition, the method appears to improve social and functional aspects of patients with TRS."                                                                                                                                                                                                                                                         |
| Hester van Biljon et al. 2015     | An Action Research Approach to Profile an Occupational Therapy Vocational Rehabilitation Service in Public Healthcare                                                            | The aim of the project was to develop a tool that would allow occupational therapists doing vocational rehabilitation, to systematically and comprehensively profile their services | Not stated                                                                                                                               | Return to work program. Job-seeker programs and related support. Prevocational skills training and support. | Not stated                                    | Not stated                 | Work-hardening, work readiness, conditioning.                                                                                                                                                                                                                                                    | Not stated                                                                                                                                                                                                                                                                                                                                                                                                                                                                                                                                                                                 | Having a comprehensive and contextually relevant tool that effectively indicates what a vocational rehabilitation service looks like, and /or should look like, will be helpful to occupational therapists that are offering, or wish to offer, vocational rehabilitation services in the public healthcare as well as in private practices. This allows them to set goals and develop their practices in a systematic and mindful manner. |

|                                |                                                                                                        |                                                                                                                                                         |                                            |                                                                                                                                      |            |                                                                                                                                                             |                                                                                                                                                                                                                                                                                                         |                                                                                                                                |                                                                                                                                                                                                                                                                                                                                                                                                                                                        |
|--------------------------------|--------------------------------------------------------------------------------------------------------|---------------------------------------------------------------------------------------------------------------------------------------------------------|--------------------------------------------|--------------------------------------------------------------------------------------------------------------------------------------|------------|-------------------------------------------------------------------------------------------------------------------------------------------------------------|---------------------------------------------------------------------------------------------------------------------------------------------------------------------------------------------------------------------------------------------------------------------------------------------------------|--------------------------------------------------------------------------------------------------------------------------------|--------------------------------------------------------------------------------------------------------------------------------------------------------------------------------------------------------------------------------------------------------------------------------------------------------------------------------------------------------------------------------------------------------------------------------------------------------|
| Ikenna D. Ebuenyi et al. 2019  | Employability of Persons With Mental Disability: Understanding Lived Experiences in Kenya              | To highlight the barriers to employment experienced by persons with mental disabilities in Kenya and how they manage to find work against all the odds. | Not stated                                 | Social networks for persons with mental disabilities. Provision of reasonable accommodation in the workplace and healthcare sectors. | Not stated | Not stated                                                                                                                                                  | Setting up social development programs that would provide individuals who want to opt for self-employment. Community based rehabilitation.                                                                                                                                                              | Not stated                                                                                                                     | Our study has highlighted that persons with mental disabilities in Kenya can work. We have also shed light on the various challenges (personal and environmental) affected persons encounter in their quest to enjoy their fundamental human right to employment.                                                                                                                                                                                      |
| Chitra Khare et al 2020        | Employment functioning in people with severe mental illnesses living in urban vs. rural areas in India | To examine rates and patterns of work, interest in work, and perceived benefits and barriers to work in people with SMI.                                | Private Psychiatric outpatients department | Supported employment                                                                                                                 | Not stated | Not stated                                                                                                                                                  | Teaching illness self-management skills in supported employment. Systematic involvement of families in supported employment, including help with job finding through their extended social networks, collaboration on mental illness management, and facilitating work in family business.              | Not stated                                                                                                                     | The findings suggest that attention should be paid to adapting models of vocational rehabilitation to the cultural context of developing countries to improve the employment outcomes of persons with SMI.                                                                                                                                                                                                                                             |
| Reema Samuel, K. S. Jacob 2017 | Occupational therapy in India: focus on functional recovery and need for empowerment                   | To discuss the role of occupational therapy in bridging the gap between symptomatic improvement and functional recovery.                                | Not stated                                 | Not stated                                                                                                                           | Not stated | Patient and family empowerment. Focus on achieving functional recovery. Optimizing the fit between an individual's abilities and the environmental demands. | Group therapy. Motivational enhancement therapy. Rehabilitative and recovery model (prevocational evaluation, vocational training, life skills training). Cognitive therapy. Behaviour therapy approaches. Graded exercises to manage deficient or maladaptive task and social and occupational skills. | Improved and enhanced self-esteem through graded tasks, improved goal setting, and problem-solving and decision-making skills. | While it can be argued that the Indian government should modify legislation, open more tertiary care hospitals, grant more educational institutions to train personnel, and likewise, it is time to look at modifiable factors from an individual perspective. The answer might lie in improving one's own understanding of the complexity of mental illness, increasing the repertoire of treatment models, liaising with the multidisciplinary team, |

1  
2  
3  
4  
5  
6  
7  
8  
9  
10  
11  
12  
13  
14  
15  
16  
17  
18  
19  
20  
21  
22  
23  
24  
25  
26  
27  
28  
29  
30  
31  
32  
33  
34  
35  
36  
37  
38  
39  
40  
41  
42  
43  
44  
45  
46

|                                |                                                                                                                           |                                                                                                                                        |            |                                                                                                                                                                                                                                                                                                                                                                                                                                                                                                                                                                                                                                                                                                                                                                                                                                                                |            |            |                                                                                                                                                                                                                                                                                                                                                                                                                                     |            |                                                                                                                                                                                                                                                                                                                                                                                                                                                                        |
|--------------------------------|---------------------------------------------------------------------------------------------------------------------------|----------------------------------------------------------------------------------------------------------------------------------------|------------|----------------------------------------------------------------------------------------------------------------------------------------------------------------------------------------------------------------------------------------------------------------------------------------------------------------------------------------------------------------------------------------------------------------------------------------------------------------------------------------------------------------------------------------------------------------------------------------------------------------------------------------------------------------------------------------------------------------------------------------------------------------------------------------------------------------------------------------------------------------|------------|------------|-------------------------------------------------------------------------------------------------------------------------------------------------------------------------------------------------------------------------------------------------------------------------------------------------------------------------------------------------------------------------------------------------------------------------------------|------------|------------------------------------------------------------------------------------------------------------------------------------------------------------------------------------------------------------------------------------------------------------------------------------------------------------------------------------------------------------------------------------------------------------------------------------------------------------------------|
|                                |                                                                                                                           |                                                                                                                                        |            |                                                                                                                                                                                                                                                                                                                                                                                                                                                                                                                                                                                                                                                                                                                                                                                                                                                                |            |            |                                                                                                                                                                                                                                                                                                                                                                                                                                     |            | changing our own attitudes about the treatment process, and practicing instead of preaching client-centeredness.                                                                                                                                                                                                                                                                                                                                                       |
| Hester M van Biljon et al 2016 | Opinions of occupational therapists on the positioning of vocational rehabilitation services in Gauteng Public Healthcare | To report on the opinions of occupational therapists on the positioning of vocational rehabilitation services in the Gauteng province. | Not stated | Prevention is an educative service for the prevention of injury at work and to create an awareness of good work practice, averting the development and/or exacerbation of pathology. Screening of general or specific work related skills is a short prescriptive process used to filter and effectively refer patients to more specialised therapists or facilities and supports efficient service delivery. Assessment services involve the assessment of the ability of a person who has an injury or illness's, to be able to work. Intervention services are programmes aimed at correcting or compensating for ability to work deficits. Placement services are the returning of patients to their own, alternative or new work in the open labour market; or to sheltered - or protected workshops. Follow up is done of patients who used the services | Not stated | Not stated | Stress management. Job modification, case management, pain management, work hardening, work preparation or readiness, work visits, work guidance, work-place accommodation, work adaptation, job seekers groups, self-employment initiatives, support groups and other return to work efforts. Job analysis. Vocational guidance and counselling, outpatient support groups, job acquainting, adaptation and accommodation efforts. | Not stated | The results of this survey showed a general lack of consensus amongst occupational therapists about what vocational rehabilitation services should be offered at the different levels of public healthcare. With singular exceptions the generic opinion was that occupational therapy's vocational rehabilitation services should be offered in public healthcare. No other opinions from this survey give guidance or insight to support planning and policy making. |

|                                                                                                                                  |                              |                                                                                   |                                                                                                            |                                                                                                     |                                                                                                                                                                                                                                                                                                                                                                                              |            |                                                                       |                                                                                                                                                                                                                                                |            |                                                                                                                                                                                                                                                                                                                                                                                                                                                                                                                                                                                                    |
|----------------------------------------------------------------------------------------------------------------------------------|------------------------------|-----------------------------------------------------------------------------------|------------------------------------------------------------------------------------------------------------|-----------------------------------------------------------------------------------------------------|----------------------------------------------------------------------------------------------------------------------------------------------------------------------------------------------------------------------------------------------------------------------------------------------------------------------------------------------------------------------------------------------|------------|-----------------------------------------------------------------------|------------------------------------------------------------------------------------------------------------------------------------------------------------------------------------------------------------------------------------------------|------------|----------------------------------------------------------------------------------------------------------------------------------------------------------------------------------------------------------------------------------------------------------------------------------------------------------------------------------------------------------------------------------------------------------------------------------------------------------------------------------------------------------------------------------------------------------------------------------------------------|
|                                                                                                                                  |                              |                                                                                   |                                                                                                            | offered, this could be with employers, referral sources, family members and the patients themselves |                                                                                                                                                                                                                                                                                                                                                                                              |            |                                                                       |                                                                                                                                                                                                                                                |            |                                                                                                                                                                                                                                                                                                                                                                                                                                                                                                                                                                                                    |
| 7<br>8<br>9<br>10<br>11<br>12<br>13<br>14<br>15<br>16<br>17                                                                      | Tania Buys 2015              | Professional competencies in vocational rehabilitation: Results of a Delphi study | To identify professional competencies required to practice in the area of work by occupational therapists. | Not stated                                                                                          | Vocational training, placement and follow-up. Work readiness/ work preparation programmes                                                                                                                                                                                                                                                                                                    | Not stated | Client centered, objectivity, adaptability, professionalism, respect. | Vocational guidance, job analysis, workplace visits, job description review, reasonable accommodations, work hardening, work conditioning, work simulation, life skills, stress management, prevocational skills, job-seeking skills training. | Not stated | We need to as an occupational therapy profession to ensure that we provide competent, professional, contextually relevant vocational rehabilitation services to clients which enables them to fulfil their roles as independent citizens in a democratic South Africa free from disability discrimination.                                                                                                                                                                                                                                                                                         |
| 18<br>19<br>20<br>21<br>22<br>23<br>24<br>25<br>26<br>27<br>28<br>29<br>30<br>31<br>32<br>33<br>34<br>35<br>36<br>37<br>38<br>39 | Kreshnee Govender et al 2018 | The role of the occupational therapist in case management in South Africa         | To identify the occupational therapist's role and scope of practice in case management in South Africa.    | Not stated                                                                                          | Case management - appears to be utilised as part of an early intervention approach once there has been an extended period of absence from work or a high rate of absence due to illness (where the service entails comprehensive assessment to determine a care plan and coordinating and monitoring client care to prevent long term absenteeism thereby contributing to cost containment). | Not stated | Planning with the client. Client advocacy.                            | Work site visits. Liaison with the employer to aid in the employee's transition back to work, client's reintegration in the work environment. Develop a care plan. Re-skilling/training to aid in a work re-entry.                             | Not stated | The study reveals that occupational therapists in South Africa are involved in case manager functions and are implementing case management as a strategy or approach to manage incapacity due to ill-health and disability in the workplace. Occupational therapists in South Africa that are positioned in various settings viz. insurance, private practice, health consulting, and Workmen's Compensation, have indicated involvement in case management and this study confirmed the utilisation of this intervention in vocational rehabilitation and as an element of disability management. |

1  
2  
3  
4  
5  
6  
7  
8  
9  
10  
11  
12  
13  
14  
15  
16  
17  
18  
19  
20  
21  
22  
23  
24  
25  
26  
27  
28  
29  
30  
31  
32  
33  
34  
35  
36  
37  
38  
39  
40  
41  
42  
43  
44  
45  
46

|                                                       |                                                                   |                                                                                      |                                                                                                     |                                                                                                                                                                                                                                                                                                                                                                                                                                                                                                  |            |            |                                                                                                                                                                                                                                                                                                                                      |                                                                                             |                                                                                                                                                                                                                                                                                                                                                                                                                                                                                                                                                                                                                                                                                                                                                                                                                                                                                                                                                                                                   |
|-------------------------------------------------------|-------------------------------------------------------------------|--------------------------------------------------------------------------------------|-----------------------------------------------------------------------------------------------------|--------------------------------------------------------------------------------------------------------------------------------------------------------------------------------------------------------------------------------------------------------------------------------------------------------------------------------------------------------------------------------------------------------------------------------------------------------------------------------------------------|------------|------------|--------------------------------------------------------------------------------------------------------------------------------------------------------------------------------------------------------------------------------------------------------------------------------------------------------------------------------------|---------------------------------------------------------------------------------------------|---------------------------------------------------------------------------------------------------------------------------------------------------------------------------------------------------------------------------------------------------------------------------------------------------------------------------------------------------------------------------------------------------------------------------------------------------------------------------------------------------------------------------------------------------------------------------------------------------------------------------------------------------------------------------------------------------------------------------------------------------------------------------------------------------------------------------------------------------------------------------------------------------------------------------------------------------------------------------------------------------|
| Occupational Therapy Association Of South Africa 2020 | Position paper on vocational rehabilitation                       | Not stated                                                                           | Various settings including schools for learners with special needs transitioning to world of world. | Prevention is an educative service for the prevention of injury at work and to create an awareness of good work practice, averting the development and/or exacerbation of pathology. Screening of general or specific work related skills is a short prescriptive process used to filter and effectively refer patients to more experienced therapists. Assessment and evaluation services. Intervention services are aimed at correcting adapting or compensating for ability to work deficits. | Not stated | Not stated | Skills training, sheltered workshops, entrepreneurial and self-employment initiatives. Job modification, case management, work trials, work hardening, work preparation/readiness, work visits, work/vocational guidance and counselling, work-palce accommodation, work adaption, job seekers groups, support groups. Job analysis, | Not stated                                                                                  | The primary aim of occupational therapy's vocational rehabilitation intervention needs to be relevant and of therapeutic value to the client so as to meet SDG9 as far as it is possible. The type of vocational rehabilitation service that occupational therapists in South Africa offer should be dictated by the vocational needs and aspirations, social structures and contextual realities of the clients. All occupational therapists can and should be able to offer basic vocational rehabilitation. Newly qualified occupational therapists have to be able to work independently at a basic level in a variety of vocational rehabilitation settings. Those vocational rehabilitation services that require competencies beyond a basic level need to be referred to therapists who have acquired, and can provide proof of the additional necessary competencies that provide competent, professional, contextually relevant vocational rehabilitation services to clients they see. |
| Madri Engelbrecht et al 2017                          | Supported Employment for people with mental disabilities in South | To report on the cost and affordability of SE services offered to people with mental | Psychiatric hospital in Cape Town (clients from forensic                                            | Supported employment                                                                                                                                                                                                                                                                                                                                                                                                                                                                             | Not stated | Not stated | Job matching. Work in protective factories. Personal life skills training (money                                                                                                                                                                                                                                                     | Reduction in the consumption of mental health services by people who entered employment. SE | Evidence from the study thus reflects the cost of SE services to people with mental disability as                                                                                                                                                                                                                                                                                                                                                                                                                                                                                                                                                                                                                                                                                                                                                                                                                                                                                                 |

|                             |                                                                                     |                                                                                                                                                                                                                             |                                                      |                      |            |                                                                                                                                                                                                                                                                                          |                                                                                                                                                                                                                                                                                                                                                                                                                                                                                                               |                                                                                                                                                                                                                                                                                                                                                                                                                                                                                                                                                             |                                                                                                                                                                                                                                                                                                                                                                                                                                                                           |
|-----------------------------|-------------------------------------------------------------------------------------|-----------------------------------------------------------------------------------------------------------------------------------------------------------------------------------------------------------------------------|------------------------------------------------------|----------------------|------------|------------------------------------------------------------------------------------------------------------------------------------------------------------------------------------------------------------------------------------------------------------------------------------------|---------------------------------------------------------------------------------------------------------------------------------------------------------------------------------------------------------------------------------------------------------------------------------------------------------------------------------------------------------------------------------------------------------------------------------------------------------------------------------------------------------------|-------------------------------------------------------------------------------------------------------------------------------------------------------------------------------------------------------------------------------------------------------------------------------------------------------------------------------------------------------------------------------------------------------------------------------------------------------------------------------------------------------------------------------------------------------------|---------------------------------------------------------------------------------------------------------------------------------------------------------------------------------------------------------------------------------------------------------------------------------------------------------------------------------------------------------------------------------------------------------------------------------------------------------------------------|
|                             | Africa: cost calculation of service utilisation                                     | disabilities in South Africa.                                                                                                                                                                                               | wards, general wards and the outpatient department). |                      |            |                                                                                                                                                                                                                                                                                          | handling, grooming, use of transportation, management of symptoms, time management, communication). Simulated work. Trial placement, job advocacy ( at job site with employers and co-workers). Evaluation of goodness of job fit. Evaluation of employment potential. Work visit ( to observe real work, to discuss reasonable accommodation, to assist with performance appraisal). Job coaching and job support. Bridging programme in preparation for employment in the open labour market. Support group | promotes an outcome of open labour market employment with the associated monetary and non-monetary benefits.                                                                                                                                                                                                                                                                                                                                                                                                                                                | substantially lower than the current government investment in disability grants and protective workshops subsidies. SE will combat unemployment, work towards poverty reduction and redress inequality as it pertains to people with disabilities. engagement with funding sources that currently support traditional vocational rehabilitation approaches is needed to present SE as a viable alternative strategy for return-to-work endeavors.                         |
| Lana Van Niekerk et al 2011 | Supported employment: Recommendations for successful implementation in South Africa | To report on the findings of a descriptive qualitative study in which supported employment (SE), as a potential strategy to facilitate the employment of persons with disability in the open labour market in South Africa. | Not stated                                           | Supported employment | Not stated | Competitive employment should always be the ultimate outcome. A client-centered approach should be used. Support should be provided to ensure long-term sustainability employment. Support consumer goals and empower them with choices and information. No more support than needed and | Job finding, job analysis, job matching, job coaching. On-going support that is determined by the worker's individual needs. Protective and sheltered workshops.                                                                                                                                                                                                                                                                                                                                              | SE achieve participation in competitive employment. Participants in SE earned more and worked more hours per month than those who had had prevocational training. Person with disabilities have an opportunity to be an active and contributing member of the society. Lessen the economic burden the government. Positively influence the disabled person's health and well-being. Provided income, personal development, provided arena for social development, self esteem and identity. Integration of persons with disability into mainstream society. | "The authors propose SE as a model of choice to drive the process of economic empowerment for persons facing disabling conditions. In developing a SE model suitable for South Africa, funding and infrastructure should be used in such a way that integrated career management is a viable option for persons with disability. A holistic approach is needed because components of SE, such as the assessment of work skills, placement in suitable work and reasonable |

1  
2  
3  
4  
5  
6  
7  
8  
9  
10  
11  
12  
13  
14  
15  
16  
17  
18  
19  
20  
21  
22  
23  
24  
25  
26  
27  
28  
29  
30  
31  
32  
33  
34  
35  
36  
37  
38  
39  
40  
41  
42  
43  
44  
45  
46

|                             |                                                                                                            |                                                                                                                                                                          |                                                                                                               |                                                                                                                                                                                         |            |                                                     |                                                                                                                                                                                                                                                                                                                                                                                                                                                                                                                                         |                                                                                                                                  |                                                                                                                                                                                                                                                                                                                                                                                                                                                                                    |
|-----------------------------|------------------------------------------------------------------------------------------------------------|--------------------------------------------------------------------------------------------------------------------------------------------------------------------------|---------------------------------------------------------------------------------------------------------------|-----------------------------------------------------------------------------------------------------------------------------------------------------------------------------------------|------------|-----------------------------------------------------|-----------------------------------------------------------------------------------------------------------------------------------------------------------------------------------------------------------------------------------------------------------------------------------------------------------------------------------------------------------------------------------------------------------------------------------------------------------------------------------------------------------------------------------------|----------------------------------------------------------------------------------------------------------------------------------|------------------------------------------------------------------------------------------------------------------------------------------------------------------------------------------------------------------------------------------------------------------------------------------------------------------------------------------------------------------------------------------------------------------------------------------------------------------------------------|
|                             |                                                                                                            |                                                                                                                                                                          |                                                                                                               |                                                                                                                                                                                         |            | no less than necessary.                             |                                                                                                                                                                                                                                                                                                                                                                                                                                                                                                                                         |                                                                                                                                  | accommodation do not necessarily follow a linear process."                                                                                                                                                                                                                                                                                                                                                                                                                         |
| Lana Van Niekerk et al 2015 | Time utilisation trends of supported employment services by persons with mental disability in South Africa | To determine the feasibility of supported employment (SE) as a strategy with which to facilitate the employment of persons with disability in competitive work contexts. | Psychiatric hospital in Cape Town (clients from forensic wards, general wards and the outpatient department). | Supported employment (SE) is a return-to-work strategy promoting the inclusion of persons with disabilities in competitive employment environments. Prepare work placement. Work visit. | Not stated | On-going support. Individualized support. Advocacy. | Job finding, Job analysis, Job matching and Job coaching. Reasonable accommodation. On-going support. Protective workshops. Non-job advocacy. Personal life skills. Simulated work. Trial placement, Person-centred instructional plans, Job advocacy - at job site with employers. Job advocacy - co-workers (and customers). Evaluation of employment potential. Evaluation of goodness of job fit. Work visit to observe real work. Work visit to discuss reasonable accommodation. Work visit to assist with performance appraisal. | To achieve employment outcomes for people with mental disabilities. Integration of mental health service users in the workplace. | SE services can be considered as a viable option for return to work in resource-constrained environments. Providers of SE services will need to modify approaches in order to meet contextual realities. Because the bulk of costs associated with SE are in the remuneration of service providers, understanding the number of provider hours necessary will be an important consideration for employers in middle income countries who are concerned with the feasibility of SE. |



# BMJ Open Vocational rehabilitation for mental health service users with chronic mental illness in low-income to upper-middle-income countries: a scoping review protocol

Munyaradzi Chimara <sup>1</sup>, Lana van Niekerk,<sup>2</sup> Hester Maria van Biljon<sup>3</sup>

**To cite:** Chimara M, van Niekerk L, van Biljon HM. Vocational rehabilitation for mental health service users with chronic mental illness in low-income to upper-middle-income countries: a scoping review protocol. *BMJ Open* 2021;0:e047781. doi:10.1136/bmjopen-2020-047781

► Prepublication history and additional online supplemental material for this paper are available online. To view these files, please visit the journal online. To view these files, please visit the journal online (<http://dx.doi.org/10.1136/bmjopen-2020-047781>).

Received 10 December 2020

Accepted 06 July 2021

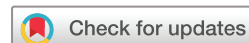

© Author(s) (or their employer(s)) 2021. Re-use permitted under CC BY-NC. No commercial re-use. See rights and permissions. Published by BMJ.

For numbered affiliations see end of article.

## Correspondence to

Mr Munyaradzi Chimara; [munyagreen@hotmail.com](mailto:munyagreen@hotmail.com)

## ABSTRACT

**Introduction** Work is integral to the occupations of human beings and accounts for up to a third of time spent in an average adult life. Occupational therapists play a role in vocational rehabilitation of mental health service users (MHSUs) with the aim of optimising their work participation. It is advisable that occupational therapists providing vocational rehabilitation to MHSUs with chronic mental illness in mental healthcare settings are guided by a practice framework developed for that particular context. This scoping review aims to summarise existing evidence on vocational rehabilitation for MHSUs in low-income to upper-middle-income countries. The findings will inform subsequent phases of research undertaken to formulate a vocational rehabilitation practice framework for MHSUs in Namibia.

**Methods and analysis** The scoping review will employ the five stage methodological framework proposed by Arksey and O'Malley. This will be used in conjunction with the Preferred Reporting Items for Systematic Reviews extension for Scoping Reviews (PRISM-ScR) and Joanna Briggs scoping review guidelines. MESH terms, Boolean operators and truncation strategies will be employed for a comprehensive article search in electronic scholarly databases. These databases will include PsycINFO, EBSCOhost, HINARI, Google scholar, Medline, CINAHL, PubMed, Cochrane Library, Scopus, Science Direct and Wiley Online Library. Mendeley and Rayyan, both open source platforms, will be used for title, abstract and full-text screening, as well as data extraction. Data will be sifted and sorted by key categories and themes using a data charting form.

**Ethics and dissemination** The scoping review findings will be published in a peer-reviewed journal and presented at local and international conferences. Ethical clearance for this study will not be required as secondary data will be utilised and there are no patients involved.

## INTRODUCTION

The first author (MC) for this scoping review protocol is pursuing doctoral studies of which the proposed scoping review forms the foundation. The envisaged outcome of the doctoral studies will be a vocational rehabilitation

## Strengths and limitations of this study

- Regular peer debriefing with second and third authors will enhance credibility of the scoping review findings.
- A health sciences librarian have been consulted and will remain involved in the search strategy.
- The scoping review protocol have been submitted for registration and publication, thus exposing it to a rigorous peer review process.
- A key limitation is that the review will include sources published in English only due to lack of funding for this project.

(VR) practice framework for mental health service users (MHSUs) with chronic mental illness in Namibia, which will be used by occupational therapists working in mental healthcare settings. The process of developing this practice framework will follow four sequential phases; (1) scoping review of VR of MHSUs in low-income to upper-middle income countries, (2) stakeholder engagement to explore factors to be considered for VR in Namibia, (3) expert consensus on guideline statements and (4) evidence synthesis to produce the draft occupational therapy VR framework for MHSU with chronic mental illness. The second and third authors are involved in the project as primary (LvN) and secondary (HMvB) supervisors, respectively.

## Background

Work provides a significant life role that accounts for up to a third of an average adult life.<sup>1</sup> Work is also fundamental to the practice of occupational therapy, which is built on a belief in the necessity and value of occupation.<sup>1</sup> Occupational therapists use occupations or activities that are meaningful and purposeful to restore or maintain function in

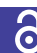

1 the areas of work, self-care and leisure for people with  
2 physical and/or psychosocial dysfunction. The meaning  
3 of vocational or work rehabilitation is understood differ-  
4 ently by different groups of people and professions.  
5 In occupational therapy practice, VR is defined as an  
6 evidence-based systematic process provided in different  
7 settings, services and activities to working age individuals  
8 with health-related impairments, limitations or restric-  
9 tions with work functioning, and whose primary aim is  
10 to optimise work participation.<sup>2</sup> VR 'is whatever helps  
11 someone with a health problem to stay at, return to and  
12 remain in work'.<sup>3</sup> It enables persons with physical or  
13 mental impairments or disabilities to overcome barriers  
14 to accessing, maintaining or returning to employment  
15 or other useful occupations.<sup>4</sup> It is provided in different  
16 settings including hospitals, rehabilitation centres, work-  
17 place, sheltered employment facilities, etc. In the VR  
18 process, occupational therapists often provide a bridge  
19 that links clients to employers, doctors, and other stake-  
20 holders involved.<sup>1</sup>

21 van Biljon *et al*<sup>5</sup> identified six types of VR services  
22 specifically offered by occupational therapists. These are  
23 prevention, screening, assessment, intervention, place-  
24 ment and follow-up. Prevention focuses on providing  
25 education and raising awareness of good work practice  
26 to avoid development and/or worsening of illness. Voca-  
27 tional assessment entails measuring or determining the  
28 ability of a person who has an illness to be able to work  
29 whereas intervention aims at correcting or compensating  
30 for work ability deficits and improve work performance.<sup>5</sup>  
31 Intervention which is the focus of the proposed scoping  
32 review, therefore, include work preparation, readiness,  
33 work hardening, guidance, accommodation, adapta-  
34 tion, workplace visits, self-employment initiatives as well  
35 as support groups.<sup>5</sup> Placement entails facilitating clients'  
36 return to work while follow-up involves monitoring and  
37 evaluating progress made with clients who received VR  
38 service through telephonic or electronic communication  
39 or workplace visits.<sup>5</sup> Although the types of VR identified  
40 above seem to follow a sequential process from preven-  
41 tion to follow up, current evidence suggests a paradigm  
42 shift towards 'place first then train'.<sup>6</sup> Place first then  
43 train VR strategy promotes rapid placement of MHSUs  
44 in competitive work settings, followed by in vivo support,  
45 resources and training that helps the individual to success-  
46 fully remain in those settings.<sup>6</sup> This means that placement  
47 and follow-up can be viewed as part of VR intervention.  
48 However, based on the first author's experience in and  
49 observation of VR for MHSUs in low-income to middle-  
50 income countries, the concept of 'place first then train'  
51 as well as supported employment is not well established  
52 in these settings.

53 For MHSUs with chronic mental illness, work is of  
54 particular importance to their mental health and well-  
55 being. Evidence indicates that engagement in employ-  
56 ment or work by itself is 'associated with reduced  
57 symptoms, reduced hospital admissions, improved social  
58 skills, improved self-esteem, improved family atmosphere

and greater personal independence'.<sup>2</sup> Moreover, work is  
a significant means for MHSUs to meet their basic needs  
and is relevant to their social status, feeling of personal  
accomplishment, freedom and security.<sup>4</sup> Work enables  
social inclusion and provides opportunity for MHSUs  
to make a meaningful contribution to the community.<sup>7</sup>  
Swart and Buys<sup>2</sup> assert that people with mental disabilities  
should work to get better rather than getting better to  
work. Lloyd<sup>7</sup> reported that 'people with chronic mental  
illness actively strive to obtain meaningful roles and an  
appropriate vocational place in the community'.

Occupational therapists play a central role in VR for  
MHSUs with chronic mental illness. They use their knowl-  
edge of pathology together with their ability to analyse  
activity to improve the occupational performance area  
of work.<sup>5</sup> Using a Delphi technique with a panel of 35  
occupational therapists, Buys<sup>8</sup> identified 16 occupational  
therapy professional competencies that are essential in  
the delivery of VR services to workers with disabilities in  
South Africa. One of the key competencies identified by  
Buys<sup>8</sup> is that occupational therapists should understand  
various VR services and apply the VR process within a  
variety of contexts.

Ross<sup>1</sup> suggests five types of knowledge that occupa-  
tional therapists use in occupation-focused VR. These  
include; (1) work and workplace knowledge; (2) occu-  
pational knowledge; (3) social equity knowledge; (4)  
condition-based knowledge and (5) other knowledge.  
Work and workplace knowledge entails the nature and  
demands of the job, employer perspective as well as legis-  
lation governing work. Occupational knowledge is drawn  
from the occupational science paradigm. It is centred  
on human occupation and enshrines the value of partici-  
pation in meaningful occupations, worker identity as  
well as occupational justice. Social equity knowledge is  
about the impact of societal barriers on social inclusion,  
whereas condition-based knowledge entails the nature of  
individuals' condition or disability's potential impact on  
function. Finally, Ross<sup>1</sup> categorises other knowledge as  
sector-specific information such as the field of insurance  
and information technology.

Given the above background, it is indeed essential that  
occupational therapists providing VR to MHSUs with  
chronic mental illness in mental healthcare settings are  
guided by a framework developed for a particular context.  
This is aligned to the decoloniality concept, which  
stresses the need for contextually relevant practice that  
prioritises the physical, environmental, socioeconomic  
and cultural conditions of the people whom occupational  
therapists serve.<sup>9</sup> The proposed scoping review, therefore  
aims to gather evidence on VR strategies and interven-  
tions used in institutional settings for MHSUs in compa-  
rable contexts to Namibia. Countries to be considered as  
having comparable contexts to Namibia shall be based on  
income groups as defined by the World Bank. Three of  
the four income groups, namely low, low-middle-income  
and upper-middle-income countries will be considered  
for the proposed scoping review.

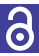

## Review objectives

Given the above background, the key objectives of the proposed scoping review are:

1. Provide a detailed overview of all the studies on VR of MHSUs with chronic mental illness, within the occupational therapy scope of practice, in low-income to upper-middle-income countries.
2. Identify the different types, principles and strategies of institution-based VR interventions within the occupational therapy scope of practice for MHSUs who have chronic mental illness in low-income to upper-middle-income countries.

## Review question

The following question will be considered in the scoping review: What is known from the existing literature about institution based VR for MHSUs who have chronic mental illness from low-income to upper-middle-income countries?

## METHODS

### Study design

The proposed scoping review will employ a methodological framework originally suggested by Arksey and O'Malley<sup>10</sup> and subsequently refined by Levac *et al.*<sup>11</sup> and Colquhoun *et al.*<sup>12</sup> The framework is composed of five successive stages namely:

1. Defining the research question.
2. Identifying relevant studies.
3. Study selection.
4. Charting the data.
5. Collating, summarising and reporting the results.

The aforementioned framework will be used in conjunction with the Preferred Reporting Items for Systematic Reviews extension for Scoping Reviews (PRISMA-ScR) proposed by Tricco *et al.*<sup>13</sup> PRISMA-ScR provides a reporting guide that outlines a minimum set of items that should be included in scoping reviews.<sup>13</sup> The guideline consist of 20 essential reporting items and two<sup>2</sup> optional items applicable for scoping reviews. According to Tricco *et al.*<sup>13</sup> in addition to providing a reporting guidance for this specific type of knowledge synthesis, PRISMA-ScR increases methodological transparency and update of research findings.

### Time frame

The scoping review will be conducted between June 2021 and August 2021. Additional time may be allocated to allow authors to incorporate changes to the scoping review protocol based on inputs from reviewers.

### Stage I: defining the research question(s)

A clear review question helps the researcher to search literature effectively, and provides a sound structure for the development of the scoping review report.<sup>14</sup> A scoping review question should have three elements; population, concept and context (PCC).<sup>14</sup> Arksey and

O'Malley<sup>10</sup> recommend that a wide approach should be maintained in phrasing the scoping review question in order to generate breadth of coverage. Subquestions may be necessary to justify mapping of the evidence by population or context.<sup>14</sup> Therefore, the broad question for this scoping review is; what is known from the existing literature about institution based CR fitting into the scope of occupational therapists for MHSUs who have chronic mental illness from low and middle income countries? Breaking down the question into PCC, the population is 'MHSUs with chronic mental illness', the concept is 'VR', and the context is 'institutions in low to upper middle income countries'.

### Stage II: identifying relevant studies

In order for the scoping review to be as comprehensive as possible, the research evidence will be searched through different sources, namely, electronic databases, reference lists and handsearching of key journals.<sup>10</sup> A preliminary literature search on the scoping review topic to clarify the inclusion and exclusion criteria was conducted on a couple of databases including Pubmed with the assistance from a qualified subject librarian. A full search strategy is attached as online supplemental file Annexure A.

In order to refine the search, the librarian recommended the use of Medical Subject Heading (MeSH) terms, Boolean operators (ie, AND, OR, NOT) and truncation (\*) strategy. The outcome of the preliminary literature search was a list of pertinent words and index terms to inform the subsequent structured search.<sup>15</sup> The identified primary and secondary search terms are as follows: vocational rehab\*, work rehab\*, occupational rehab\*, psychosocial rehab\*, psychiatric rehab\*, mental disorders, chronic mental illness, persistent mental illness, severe mental illness, excluding Europe and North America. The next step will be a comprehensive structured search as suggested by the Joanna Briggs Institute (JBI).<sup>14</sup> The comprehensive structured search will be carried out on each of the following electronic scholarly databases; PsycInfo, EBSCOhost, Google Scholar, Medline, CINAHL, PubMed, Cochrane library, Scopus, Science Direct, HINARI and Wiley online library. Grey literature will be searched through library links such as 'libguides.sun.ac.za/medicine/thesis'. Search results will be exported from databases and imported to Mendeley citation management software where duplicates will be removed. Citations will be exported from Mendeley in a Research Information System format and imported to Rayyan for title and abstract screening. Bibliographies of studies identified through electronic database searches will be checked until saturation point is reached.<sup>10</sup> Saturation point will be reached when no new sources are identified from bibliographies of included sources. Full texts of articles will be reviewed if the researcher is not in a position to decide on the inclusion or exclusion of the study on the basis of the title and abstract.<sup>15</sup> Finally, the researcher



1 will handsearch key journals in order to identify articles  
2 that could have been missed in databases and reference  
3 list searches.<sup>10</sup>

### 4 Stage III: study selection

5 Rayyan, which is an open source web-based software plat-  
6 form, will be used for title and abstract screening, full-  
7 text screening and data extraction. Two reviewers, the  
8 first author and the third author, will be independently  
9 engaged in the screening process. Each reviewer will  
10 have three options when selecting the articles, that is, Yes,  
11 Maybe or No. A third reviewer, the second author, will  
12 be used if there is conflict in the selection process and  
13 her vote will be final. The Rayyan software for deduplica-  
14 tion of citations and use of exclusion and inclusion key  
15 words will be used. During the selection process Rayyan  
16 detects, highlights and summarises keywords for include,  
17 keys words for exclude, as well as exclusion reasons. This  
18 function will help the author to identify sources that may  
19 be included or excluded, respectively.

### 22 Inclusion criteria

23 Studies meeting the PCC criteria will be considered for  
24 inclusion.<sup>14</sup> In this study, the type of participants (P) are  
25 MHSUs who have chronic mental illness, the concept  
26 (C) is VR within occupational therapy scope of practice,  
27 and the context (C) is institutions in low to upper middle  
28 income countries. Therefore, peer-reviewed sources on  
29 VR interventions that fit into the occupational therapy  
30 scope and performed in low-income to middle-income  
31 countries, available in English and published between  
32 2010 and 2021 will be included in the scoping review.  
33 Additional inclusion criteria will include grey literature  
34 sources and sources that passed through the ethical clear-  
35 ance process.

36 Given the above mentioned criteria the following defini-  
37 tion of terms will be used:

### 39 Chronic mental illness

40 Diagnostic criterion of non-organic and personality disor-  
41 ders; long history (2years or more) of previous hospital-  
42 isations or outpatient treatment; and disability criterion  
43 including disturbing behaviour, impairment in work and  
44 non-work activities and mild impairment in basic needs.<sup>16</sup>

### 46 Vocational rehabilitation

47 A multiprofessional evidence-based approach that is  
48 provided in different settings, services, and activities to  
49 working age individuals with health-related impairments,  
50 limitations or restrictions with work functioning, and  
51 whose primary aim is to optimise work participation.<sup>2</sup>

### 53 Institutions

54 These are facilities where MHSUs may receive VR service.  
55 They include clinics, hospitals or rehabilitation centres,  
56 day-care centres, half-way houses or home, sheltered  
57 employment facilities, correctional facilities and forensic  
58 mental health settings.

### Low-income to middle-income countries

Countries whose economies are classified as low income,  
low-middle income or high middle income by the World  
Bank.

The review will only include recent sources from the  
last decade (2011–2021) because of the significant devel-  
opment that has happened in terms of VR in this period  
from ‘train and place’ to ‘place first then train’. Also,  
there has been an increase in the number of occupational  
therapists providing VR services to MHSUs in the last  
decade hence the need to focus on research produced  
during this period. The sources will be limited to those  
published in English because of limited funding for this  
project.

### Stage IV: charting the data

The fourth stage of the scoping review as proposed by  
Arksey and O’Malley<sup>10</sup> will entail charting the data of arti-  
cles selected in stage three. The charting process involves  
synthesising and interpreting qualitative data by sifting  
and sorting information by key categories and themes.<sup>10</sup>  
In order to take a broader view on VR for MHSUs, at  
the same time applying a common analytical framework  
to all selected studies, a ‘descriptive-analytical’ method  
will be employed.<sup>10</sup> The first author will develop a data  
charting form which will be independently reviewed  
by the second and third authors. All 12 items from the  
Template for Interventions Description and Replication  
checklist<sup>17</sup> will be incorporated in the data charting form  
(online supplemental file Annexure B) which will be  
used to enter the data from selected sources using Micro-  
soft Excel programme. The following information will be  
captured during this process; Author(s), year of publi-  
cation, origin/country of origin, aims/purpose, study  
population and sample size, methodology/methods,  
intervention type, comparator and details of these, dura-  
tion of the intervention, outcomes of interventions used  
and details of these, key findings that relate to the scoping  
review question.

### Stage V: collating, Summarising and reporting the results

This stage entails three subphases; (1) data collation and  
analysis, (2) reporting of results and outcomes, (3) and  
relating the results to scoping review objectives and/or  
questions.<sup>13 15</sup> A flow diagram will be used to present the  
numbers of sources of evidence screened, assessed for  
eligibility and included in the review.<sup>13</sup> Basic numerical  
and descriptive qualitative analysis of the distribution of  
the studies by year of publication, countries of origin, VR  
intervention type/strategy and research methods adopted  
will be presented in a table format. Categories of VR inter-  
vention will be based on groups suggested by van Biljon  
*et al.*<sup>5</sup> These include work preparation, work readiness,  
work hardening, guidance, accommodation, adaptation,  
work placement, workplace visits, self-employment initia-  
tives and support groups. In addition, study population,  
duration of intervention, outcomes of the intervention,  
key findings and the gaps in research will be presented

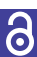

for each and every source included. Gaps in research will entail areas of further study identified by the sources. Given the above, it is envisaged that a comprehensive summary of evidence on institution based VR for MHSUs with chronic mental illness will be presented. However, analysis of extracted data is not expected to go beyond a basic descriptive analysis as this is not expected of this scoping review.

### Stage VI: consultation exercise and Stakeholder involvement

Consultation and stakeholder involvement is an optional but essential sixth stage suggested by Arksey and O'Malley.<sup>10</sup> In order for the scoping review results to be made more useful key stakeholders should contribute through sharing insights otherwise not found in the scholarly literature.<sup>10 15</sup> Therefore, the researcher will engage international networks who have interest in VR for MHSUs such as the Occupational Therapy African Regional Group and the World Federation for Mental Health. Also, subsequent to this scoping review, the researcher will engage local stakeholders who will include MHSUs, their family members and occupational therapists providing VR to MHSUs with chronic mental illness, to apply the scoping review findings to the local context.

### Patient and public involvement

No patients will be involved.

## DISCUSSION

It is envisaged that through this scoping review the first author will gather and examine the nature and extent of available literature on VR of MHSUs in low-income to upper-middle-income countries. This will be a critical step that lays the foundation for the proceeding steps in the development of a VR framework for MHSUs in the Namibian context. A VR practice framework for MHSUs with chronic mental illness will be the main outcome of the first author's PhD study. Therefore, the scoping review findings will potentially inform the development of data collection tools that will be used during stakeholder consultations in phase two of the study. Thematic areas to be covered will include, but not limited to VR intervention types, duration of the intervention, intervention principles and strategies, as well as outcomes of the interventions. More so, scoping review findings will be published in a peer-reviewed journal and presented at local and international conferences. In addition to the expected contribution to scholarly literature, the findings will guide future research in the field of mental health and VR.

### Strength and limitations

Methodological rigour is the key strength of the proposed scoping review. This scoping review protocol was developed using the latest evidence in scoping review methodology. The evidence used include JBI,<sup>14</sup> PRISMA extension for scoping reviews<sup>13</sup> and a scoping review

framework proposed by Arksey and O'Malley.<sup>10</sup> Regular peer debriefing with the second and third authors will enhance credibility and hence trustworthiness of the study. More so, the scoping review protocol will be submitted for registration and publication, therefore, it will be exposed to rigorous peer review process. On the other hand, key limitation to this scoping review is the fact that non-English sources will be excluded mainly because of lack of funding for this project.

## DISSEMINATION AND ETHICS

This scoping review will be the first step in the development of a VR framework for MHSUs with chronic mental illness in Namibia. It is anticipated that the scoping review findings will provide a summary of VR strategies in comparable contexts to Namibia. The researcher aims to submit written scoping review findings for possible publication by an international peer-reviewed journal. In addition, the findings will be presented at local and international scientific congresses and conferences. Ethical clearance for this study will not be required as secondary data will be used.

### Author affiliations

<sup>1</sup>Physical Medicine and Rehabilitation, University of Namibia Faculty of Health Sciences, Windhoek, Namibia

<sup>2</sup>Occupational Therapy, Stellenbosch University Department of Medicine, Cape Town, Western Cape, South Africa

<sup>3</sup>Occupational therapy, Stellenbosch University Faculty of Medicine and Health Sciences, Cape Town, Western Cape, South Africa

**Acknowledgements** The authors acknowledge the University of Stellenbosch librarian, Ingrid van der Westhuizen, for her assistance in formulating the search strategy and guiding the preliminary search for this project.

**Contributors** Three authors were involved in conceptualising, drafting and editing this protocol in preparation for scoping review. The first author, MC, drafted the protocol script as part of his doctoral studies. Second and third authors, LvN and HMvB, respectively, helped with protocol development and will continue with screening of sources and data extraction.

**Funding** The authors have not declared a specific grant for this research from any funding agency in the public, commercial or not-for-profit sectors.

**Competing interests** None declared.

**Patient consent for publication** Not required.

**Provenance and peer review** Not commissioned; externally peer reviewed.

**Supplemental material** This content has been supplied by the author(s). It has not been vetted by BMJ Publishing Group Limited (BMJ) and may not have been peer-reviewed. Any opinions or recommendations discussed are solely those of the author(s) and are not endorsed by BMJ. BMJ disclaims all liability and responsibility arising from any reliance placed on the content. Where the content includes any translated material, BMJ does not warrant the accuracy and reliability of the translations (including but not limited to local regulations, clinical guidelines, terminology, drug names and drug dosages), and is not responsible for any error and/or omissions arising from translation and adaptation or otherwise.

**Open access** This is an open access article distributed in accordance with the Creative Commons Attribution Non Commercial (CC BY-NC 4.0) license, which permits others to distribute, remix, adapt, build upon this work non-commercially, and license their derivative works on different terms, provided the original work is properly cited, appropriate credit is given, any changes made indicated, and the use is non-commercial. See: <http://creativecommons.org/licenses/by-nc/4.0/>.

### ORCID iD

Munyradzi Chimara <http://orcid.org/0000-0002-5720-3867>



## REFERENCES

- 1 Ross J. *Occupational therapy and vocational rehabilitation*. West Sussex: John Wiley & Sons, 2007.
- 2 Swart L, Buys T. Vocational Rehabilitation in Psychiatry and Mental Health. In: *Occupational therapy in psychiatry and mental health*, 2014: 175–93.
- 3 Waddell G, Burton K, Kendall N. *Vocational rehabilitation what works, for whom, and when*. Vocational Rehabilitation Task Group, 2008: 1–309.
- 4 Canhete Pereira RM, Monteiro I. Vocational rehabilitation and return to work: integrative review. *Rev Bras Med Trab* 2019;17:441–55.
- 5 van Biljon HM, Casteljiën D, J du Toit SH, et al. Opinions of occupational therapists on the positioning of vocational rehabilitation services in Gauteng public healthcare. *South African J Occup Ther* 2016;46:45–52.
- 6 Corrigan PW, McCracken SG. Place first, then train: an alternative to the medical model of psychiatric rehabilitation. *Soc Work* 2005;50:31–9.
- 7 Lloyd C. *Vocational rehabilitation and mental health [Internet]*. . Journal of Petrology. Wiley Backwell, 2010: 369. 1689–99. <http://dx.doi.org/10.1016/j.jsames.2011.03.003><https://doi.org/10.1016/j.gr.2017.08.001><http://dx.doi.org/10.1016/j.precamres.2014.12.018><http://dx.doi.org/10.1080/00206814.2014.902757>
- 8 Buys T. Professional competencies in vocational rehabilitation: results of a Delphi study. *South African J Occup Ther* 2015;45:48–54.
- 9 Dirette DP. Decolonialism in the Profession : Reflections from WFOT 2018;6.
- 10 Arksey H, O'Malley L. Scoping studies: towards a methodological framework. *Int J Soc Res Methodol* 2005;8:19–32.
- 11 Levac D, Colquhoun H, O'Brien KK. Scoping studies: advancing the methodology. *Implement Sci* 2010;1–18.
- 12 Colquhoun HL, Levac D, O'Brien KK, et al. Scoping reviews: time for clarity in definition, methods, and reporting. *J Clin Epidemiol* 2014;67:1291–4.
- 13 Tricco AC, Lillie E, Zarin W, et al. PRISMA extension for scoping reviews (PRISMA-ScR): checklist and explanation. *Ann Intern Med* 2018;169:467–73.
- 14 The Joanna Briggs Institute. *The Joanna Briggs Institute Reviewers' Manual 2015: Methodology for JBI scoping reviews*. Joanne Briggs Inst [Internet], 2015: 1–24. [http://joannabriggs.org/assets/docs/sumari/ReviewersManual\\_Mixed-Methods-Review-Methods-2014-ch1.pdf](http://joannabriggs.org/assets/docs/sumari/ReviewersManual_Mixed-Methods-Review-Methods-2014-ch1.pdf)
- 15 Bragazzi NL, Dini G, Parodi V, et al. Protocol of a scoping review assessing injury rates and their determinants among healthcare workers in Western countries. *BMJ Open* 2019;9:e023372.
- 16 Bachrach LL. Defining chronic mental illness.pdf. *Am Psychiatry Assoc* 1988;39:383–8.
- 17 Hoffmann TC, Glasziou PP, Boutron I, et al. Better reporting of interventions: template for intervention description and replication (TIDieR) checklist and guide. *BMJ* 2014;348:1–12.

# BMJ Open

## A scoping review exploring vocational rehabilitation interventions for mental health service users with chronic mental illness in low-income to upper-middle-income countries

|                                 |                                                                                                                                                                                                                                                                                                                                                                       |
|---------------------------------|-----------------------------------------------------------------------------------------------------------------------------------------------------------------------------------------------------------------------------------------------------------------------------------------------------------------------------------------------------------------------|
| Journal:                        | <i>BMJ Open</i>                                                                                                                                                                                                                                                                                                                                                       |
| Manuscript ID                   | bmjopen-2021-059211.R2                                                                                                                                                                                                                                                                                                                                                |
| Article Type:                   | Original research                                                                                                                                                                                                                                                                                                                                                     |
| Date Submitted by the Author:   | 15-Mar-2022                                                                                                                                                                                                                                                                                                                                                           |
| Complete List of Authors:       | Chimara, Munyaradzi; University of Namibia, Faculty of Health Sciences & Veterinary Medicine, Occupational Therapy & Physiotherapy<br>Van Niekerk, Lana; Stellenbosch University Faculty of Medicine and Health Sciences, Health and Rehabilitation<br>van Biljon, Hester; Stellenbosch University Faculty of Medicine and Health Sciences, Health and Rehabilitation |
| <b>Primary Subject Heading</b>: | Rehabilitation medicine                                                                                                                                                                                                                                                                                                                                               |
| Secondary Subject Heading:      | Mental health                                                                                                                                                                                                                                                                                                                                                         |
| Keywords:                       | REHABILITATION MEDICINE, Adult psychiatry < PSYCHIATRY, MENTAL HEALTH                                                                                                                                                                                                                                                                                                 |
|                                 |                                                                                                                                                                                                                                                                                                                                                                       |

SCHOLARONE™  
Manuscripts



I, the Submitting Author has the right to grant and does grant on behalf of all authors of the Work (as defined in the below author licence), an exclusive licence and/or a non-exclusive licence for contributions from authors who are: i) UK Crown employees; ii) where BMJ has agreed a CC-BY licence shall apply, and/or iii) in accordance with the terms applicable for US Federal Government officers or employees acting as part of their official duties; on a worldwide, perpetual, irrevocable, royalty-free basis to BMJ Publishing Group Ltd ("BMJ") its licensees and where the relevant Journal is co-owned by BMJ to the co-owners of the Journal, to publish the Work in this journal and any other BMJ products and to exploit all rights, as set out in our [licence](#).

The Submitting Author accepts and understands that any supply made under these terms is made by BMJ to the Submitting Author unless you are acting as an employee on behalf of your employer or a postgraduate student of an affiliated institution which is paying any applicable article publishing charge ("APC") for Open Access articles. Where the Submitting Author wishes to make the Work available on an Open Access basis (and intends to pay the relevant APC), the terms of reuse of such Open Access shall be governed by a Creative Commons licence – details of these licences and which [Creative Commons](#) licence will apply to this Work are set out in our licence referred to above.

Other than as permitted in any relevant BMJ Author's Self Archiving Policies, I confirm this Work has not been accepted for publication elsewhere, is not being considered for publication elsewhere and does not duplicate material already published. I confirm all authors consent to publication of this Work and authorise the granting of this licence.



1  
2  
3 **A scoping review exploring vocational rehabilitation interventions for mental health**  
4 **service users with chronic mental illness in low-income to upper-middle-income countries**  
5  
6  
7

8 **Author:** Munyaradzi Chimara (Corresponding Author)  
9 **Postal Address:** P.O. Box 50738, Bachbrecht, Windhoek, Namibia  
10 **Department:** Occupational Therapy and Physiotherapy  
11 **Institution:** University of Namibia  
12 **City:** Windhoek  
13 **Country:** Namibia  
14 **Email Address:** [munyagreen@hotmail.com](mailto:munyagreen@hotmail.com) or [mchimara@unam.na](mailto:mchimara@unam.na)  
15 **Telephone:** +264 813 906 771 and +264 61 206 5083  
16 **ORCID** 0000-0002-5720-3867  
17  
18  
19

20  
21 **Co-author 1:** Lana van Niekerk  
22 **Department:** Division of Occupational Therapy, Department of Health and  
23 Rehabilitation Sciences, Faculty of Medicine and Health Sciences.  
24 **Institution:** Stellenbosch University  
25 **City:** Cape Town  
26 **Country:** South Africa  
27 **Email:** [lanavn@sun.ac.za](mailto:lanavn@sun.ac.za)  
28 **ORCID** 0000-0003-0003-6006  
29  
30  
31  
32

33 **Co-author 2:** Hester Maria van Biljon  
34 **Department:** Division of Occupational Therapy, Department of Health and  
35 Rehabilitation Sciences, Faculty of Medicine and Health Sciences  
36 **Institution:** Stellenbosch University  
37 **City:** Cape Town  
38 **Country:** South Africa  
39 **Email:** [hestermvanbiljon@gmail.com](mailto:hestermvanbiljon@gmail.com)  
40 **ORCID** 0000-0003-4433-6457  
41  
42  
43  
44

45 **Wordcount:** 5985  
46  
47  
48

49 **Abstract**

50 **Objective**

51  
52  
53 To synthesize research published on vocational rehabilitation (VR) interventions offered in  
54 institutions, by occupational therapists, to mental health service users (MHSUs) with chronic  
55 mental illness, in low-income to upper middle-income countries (L-UMIC).  
56

57 **Design**  
58  
59  
60

1  
2  
3 This scoping review used Arksey and O'Malley's methodological framework, the Preferred  
4 Reporting Items for Systematic Reviews extension for Scoping Reviews (PRISMA-ScR) and  
5 Joanna Briggs scoping review guidelines.  
6

### 7 8 **Data sources**

9 We searched PsycInfo, EBSCOhost, HINARI, Google scholar, Medline, CINAHL, PubMed,  
10 Cochrane Library, Scopus, Science Direct and Wiley online library between 15 July and 31  
11 August 2021.  
12

### 13 14 **Eligibility criteria**

15 Sources, published in English between 2011 and 2021, on institution-based VR in occupational  
16 therapy for MHSUs who had chronic mental illness in L-UMIC were included. We included  
17 primary studies of any design.  
18

### 19 20 **Data extraction and synthesis**

21 Three reviewers used Mendeley to manage identified references, Rayyan for abstract and full  
22 text screening, and Microsoft Excel for data extraction. Data was sifted and sorted by key  
23 categories and themes.  
24

### 25 26 **Results**

27 895 sources were identified, and their title and abstracts reviewed. 207 sources were included  
28 for full text screening. 12 articles from 4 countries (South Africa, India, Brazil & Kenya) were  
29 finally included. Types of VR intervention included supported employment, case management  
30 and prevocational skills training. Client centeredness, support and empowerment were the key  
31 VR principles identified. Teaching of illness self-management, job analysis and matching, job  
32 coaching, trial placement, and vocational guidance and counseling, were the main intervention  
33 strategies reported.  
34

### 35 36 37 **Conclusions**

38 VR intervention in institutions for MHSUs in L-UMIC revealed the multidimensional  
39 uniqueness of individual MHSU's vocational ability, needs and contexts. The interventions  
40 allowed client-centered approaches that offer support, and empowerment beyond the  
41 boundaries of the institutions. Occupational therapists offering VR need to expand their  
42 interventions beyond their institutions to contexts where MHSUs are working or intending to  
43 work.  
44

45  
46  
47  
48  
49 **Keywords:** vocational rehabilitation, chronic mental illness, occupational therapy.  
50

### 51 52 53 **Strengths and limitations of this study**

- 54 • The study followed a scoping review protocol that was peer reviewed and published.
- 55 • Pre-scheduled weekly meetings among the three authors were used to promote  
56 momentum and discussions throughout the project.
- 57 • The authors used human and other library resources from two universities, namely the  
58 University of Namibia and Stellenbosch University.  
59  
60

- Sources from non-English speaking countries might have been missed and many such countries fall within the socio-economic inclusion criteria; the review was limited to English-language sources as there was no funding available for translation.
- Due to the dearth of publications from low-income to upper middle-income countries, the evidence presented in this article cannot be seen to represent vocational rehabilitation for mental health service users within the scope of occupational therapy globally.

## Introduction

Vocational Rehabilitation (VR) among mental health service users (MHSUs) with chronic mental illness is an area of concern in low-income to upper middle-income countries (L-UMIC). The majority of global burden of mental disorders is located in L-UMIC<sup>(1)</sup>, yet public expenditure on mental health, including rehabilitation services, is very low in these countries where less than one percent of total budget is allocated for mental health with resources predominantly directed to institution based care.<sup>(2,3)</sup> One such country is Namibia, located in the south-western part of Africa, and in which the first author (MC) resides. The estimated prevalence of mental illness in Namibia is 2838,71 per 100 000 population.<sup>(3)</sup> This scoping review forms the first phase of a four phased project, and the envisaged main outcome of the project is a VR practice framework for MHSUs with chronic mental illness in Namibia.

The World Bank classifies countries according to their gross national income (GNI) per capita in United States (US) dollars.<sup>(4)</sup> There are four classes of economies. For the 2022 fiscal year the GNI per capita for low-income economies was \$1046 or less; for lower middle income economies \$1046 to \$4095; upper middle-income economies ranged from \$4096 to \$12 695; and high-income economies were those with GNI per capita of \$12 696 or more.<sup>(5)</sup> Namibia was ranked as upper middle-income country at the time of this study. Other countries ranked as upper middle income are South Africa, Botswana and Libya, whereas Zimbabwe, India and Kenya are examples of lower middle-income countries. Examples of low income countries are Malawi, Uganda and Burundi.<sup>(5)</sup>

Chronic mental illness can be defined using three criteria suggested by Bachrach<sup>(6)</sup>, namely diagnostic criterion, duration of illness and disability criterion. The Diagnostic and Statistical Manual of Mental Disorders fifth edition (DSM-5) developed by the American Psychiatric Association is widely used in L-UMIC for the diagnostic criteria. Using the DSM-5, common mental conditions include schizophrenia spectrum and other psychotic conditions, bipolar and related disorders, depressive disorders and anxiety disorders.<sup>(7)</sup> In this review, duration of mental illness considered for chronicity was two years regardless of the number of relapses and remissions. The disability criterion, which is perhaps the most important of the three criteria for chronicity from the perspective of rehabilitation personnel, entails disturbing behavior, impairment in work and non-work activities and mild impairment in basic needs.<sup>(6)</sup>

Occupational therapists are health and social care professionals who use occupations or activities to restore or maintain function in the areas of work, self-care and leisure for people with physical and/or psychosocial dysfunctions.<sup>(8)</sup> Occupational therapists play an important role in VR of MHSUs with chronic mental illness who are either employed, unemployed or on sick leave.<sup>(9)</sup> Through VR occupational therapists help MHSUs to gain work, return to work or maintain an existing worker role.<sup>(10)</sup> Ross<sup>(10)</sup> highlights six stages followed in the VR process

1  
2  
3 that are somewhat similar to the occupational therapy process. These are referral, assessment,  
4 prevocational phase, worksite visit, return to work plan, intervention, evaluation and discharge.  
5 Using the VR process, occupational therapists apply various VR strategies, and work with a  
6 variety of people and professions spanning both industrial and healthcare sectors.<sup>(9)</sup> They  
7 employ a variety of occupational therapy professional competencies that include activity  
8 analysis, job analysis, identification of essential job functions, knowledge of mental health  
9 conditions, functional capacity evaluations etc.<sup>(11)</sup> In the Namibian context, occupational  
10 therapists who provide VR service are institution-based regardless of the clientele group they  
11 serve. MHSUs with chronic mental illness are an important clientele group for occupational  
12 therapist practicing VR because of their high level of unemployment vulnerability. Often,  
13 MHSUs with chronic mental illness have to compete for employment in a Namibian economy  
14 where general unemployment rate stands at 33.4%.<sup>(12)</sup> It is therefore imperative that  
15 occupational therapists providing VR to MHSUs with chronic mental illness in L-UMIC such  
16 as Namibia are guided by a framework that is sensitive to contextual realities.  
17  
18  
19  
20

21 There is limited consensus in literature on the definition of the concept and categorization of  
22 VR interventions offered by occupational therapists. One plausible categorization of VR types  
23 is by van Biljon et al<sup>(13)</sup> who identified six types, namely, prevention, screening, assessment,  
24 intervention, placement and follow-up. VR interventions focus on correcting or compensating  
25 for work ability deficits and improve work performance.<sup>(13)</sup> Suijkerbuijk et al<sup>(14)</sup> identified four  
26 types of VR interventions. These are (i) prevocational training, (ii) transitional employment,  
27 (iii) supported employment, and (iv) augmented supported employment. Prevocational skills  
28 training includes job-related skills training and symptom-related skills training, with the latter  
29 comprising cognitive training and social skills training. Transitional employment is a highly  
30 structured intervention program where MHSUs who have expressed the desire to work are  
31 placed in the open labour market on a part-time basis for a period ranging from six to nine  
32 months.<sup>(15)</sup> During the period of transitional employment, MHSUs receive on-the-job and off-  
33 site support from the VR team. Unlike transitional employment, supported employment usually  
34 has no time limit, MHSUs follow a competitive interview process for the position, and they are  
35 paid at the prevailing wage of the position.<sup>(15)</sup> Supported employment is a career-oriented VR  
36 intervention where a MHSU is assisted accessing and being successful with employment  
37 through on-the-job and offsite support. Augmented supported employment is a combination of  
38 supported employment with either prevocational training or transitional employment. In  
39 addition to VR interventions identified by Suijkerbuijk et al<sup>(14)</sup>, Swart and Buys<sup>(11)</sup> included  
40 work-hardening and case management. It is important to note that these VR intervention types  
41 do not necessarily follow a sequential process. Also, VR intervention categories seem to be  
42 overlapping. For example, Suijkerbuijk et al<sup>(14)</sup> categorized transitional and supported  
43 employment as VR intervention types, whereas van Biljon et al<sup>(13)</sup> categorized these under  
44 placement.  
45  
46  
47  
48  
49  
50

51 Vocational rehabilitation outcomes have been differentiated as hard outcomes or soft  
52 outcomes.<sup>(10)</sup> Ross<sup>(10)</sup> contends that soft outcomes are measures applicable to service users  
53 believed to be furthest away from labour market and therefore need a greater number of  
54 stepping stones. Examples of soft VR outcomes include engaging in voluntary work, doing a  
55 training course or achieving better quality of life. Examples of hard VR outcomes are; reduced  
56 number of days of absence from work, increased chances of returning to work, and improved  
57 benefit-to-cost ratios.<sup>(10)</sup> Other VR outcomes include improved self-esteem and self-concept,  
58  
59  
60

1  
2  
3 reduced symptoms of mental illness, increased personal empowerment and higher ratings of  
4 subjective wellbeing.<sup>(16)</sup>  
5

### 6 ***Rationale***

7  
8 This scoping review comprises the first of four phases the authors will follow in developing a  
9 contextually relevant VR framework for MHSUs with chronic mental illness in Namibia. The  
10 purpose of this scoping review was to map the current evidence on institution-based VR for  
11 MHSUs with chronic mental illness that fall within the occupational therapy scope of practice  
12 as defined by the World Federation of Occupational Therapists (WFOT), and originate in L-  
13 UMIC. The study aimed to identify VR interventions types, strategies, principles as well as VR  
14 outcomes. The authors focused on institution-based VR because of the current occupational  
15 therapy practice set-up in Namibia where therapists are institution-based. A scoping review  
16 was selected because it allowed for exploring the breadth and depth of available evidence for  
17 the given population, concept and context.<sup>(16)</sup> The review findings will inform the second phase  
18 of the primary author's doctoral study, which will focus on engaging with stakeholders to  
19 explore factors that should be considered by occupational therapists for their VR with MHSU's  
20 in Namibia.<sup>(8)</sup>  
21  
22  
23  
24

### 25 ***Review question***

26  
27 What is known from the existing literature about healthcare institution-based VR for MHSUs  
28 with chronic mental illness from L-UMIC?  
29

### 30 ***Objectives***

- 31  
32 i. Provide a detailed overview of all the studies on institution-based VR of MHSUs with  
33 chronic mental illness, in occupational therapy, in L-UMIC.  
34  
35 ii. Identify institution-based VR interventions in occupational therapy for MHSUs who  
36 have chronic mental illness in L-UMIC.  
37

## 38 **Methods**

### 39 ***Study design***

40  
41 This scoping review followed a protocol<sup>(8)</sup> that was peer reviewed and published. As  
42 highlighted in the protocol, the scoping review was guided by a methodological framework  
43 originally suggested by Arksey and O'Malley<sup>(17)</sup>, and subsequently refined by Levac et al<sup>(18)</sup>  
44 and Colquhoun et al<sup>(19)</sup>. The framework follows five successive steps namely; (i) defining the  
45 research question, (ii) identifying relevant studies, (iii) study selection, (iv) charting the data,  
46 and finally (v) collating, summarizing and reporting the results. Reporting of the findings of  
47 this review was guided by the Preferred Reporting Items for Systematic Reviews extension for  
48 Scoping Reviews (PRISMA-ScR) proposed by Tricco et al.<sup>(20)</sup> The PRISMA-ScR checklist  
49 used is attached as Annex A (supplementary file 1). Two adjustments were done to the  
50 methodology thus creating minor discrepancies between this study and its protocol. The first  
51 adjustment was the delay in identifying relevant studies because the authors had to wait for the  
52 publication of the protocol. The second adjustment was the withdrawal of stakeholder  
53 engagement during the scoping review study. The authors will conduct a separate and  
54 comprehensive study where stakeholders in VR will be engaged to share their views on factors  
55 to be considered for institution-based VR of MHSUs with chronic mental illness in Namibia.  
56  
57  
58  
59

### 60 ***Eligibility criteria***

1  
2  
3 The population, concept and context (PCC) criteria<sup>(21)</sup> was used to define the eligibility criteria.  
4 The population (P) was MHSUs who had chronic mental illness. Chronic mental illness was  
5 based on three aspects, (i) diagnosis criteria, (ii) period of illness, and (iii) the disability  
6 criteria.<sup>(6)</sup> In this review, chronic mental illnesses were identified as non-organic and  
7 personality disorders; long history (2 years or more) of previous hospitalizations or outpatient  
8 treatment; and disability criterion including disturbing behavior, impairment in work and non-  
9 work activities and mild impairment in basic needs.<sup>(8,22)</sup> The concept (C) was institution-based  
10 VR provided for MHSUs by occupational therapists stationed at a facility. These facilities  
11 include clinics, hospitals or rehabilitation centres, day-care centres, half-way houses or home,  
12 sheltered employment facilities, correctional facilities and forensic mental healthcare  
13 settings.<sup>(8)</sup> In this study, VR is defined as evidence-based approach that is provided in different  
14 settings, services and activities to working age individuals with mental health-related  
15 impairments, limitations or restrictions with work, and whose primary aim is to optimise work  
16 participation.<sup>(11)</sup> The context (C) was L-UMIC as defined by World Bank income grouping.  
17 Sources published in English only between 2011 and 2021 were eligible for inclusion. The  
18 rationale for including sources from the last decade (2011 – 2021) was twofold. First, there  
19 was significant development that transpired in terms of VR during this period from ‘train and  
20 place’ to ‘place first then train’. The second reason was that there has been an increase in the  
21 number of occupational therapists providing VR services to MHSUs in the last decade,  
22 therefore it was important for authors to focus on research produced in the same period. The  
23 authors included primary studies of any design that addressed VR interventions for MHSUs  
24 with chronic mental illness in L-UMIC.  
25  
26  
27  
28  
29  
30

### 31 ***Search strategy***

32  
33 The search strategy was developed with the assistance of a qualified subject librarian from the  
34 University of Stellenbosch. A preliminary search was conducted on two databases, Pubmed  
35 and CINAHL. Results of the preliminary search led to the refinement of the search strategy  
36 covering all the three elements (PCC) of the scoping review question. The following main  
37 search string was used for identifying relevant sources: (*"Psychiatric Rehabilitation" OR*  
38 *"Rehabilitation, Vocational" OR "work rehabilitation" OR "Occupational Therapy" ) AND (*  
39 *mental disorders OR mental illness OR psychiatric disorders OR psychiatric illness ) NOT (*  
40 *"North America" OR Europe\* ) AND ( (severe OR chronic OR long-term OR persistent) ).*  
41 Medical Subject Heading (MeSH) terms, Boolean operators (i.e. AND, OR, NOT) and  
42 truncation strategy were used to refine the search.<sup>(8)</sup> The search strategy was refined and  
43 tailored to specific databases and run in each of the following electronic data bases; PsycInfo,  
44 EBSCOhost, Google Scholar, Medline, CINAHL, PubMed, Cochrane library, Scopus, Science  
45 Direct, HINARI and Wiley online. Grey literature sources were searched through library links  
46 for universities subscribed to by all three authors engaged in this review. Additional search  
47 was done through checking bibliographies of all the included sources. The full search strategy is  
48 attached as Annex B (supplementary file 2).  
49  
50  
51  
52  
53

### 54 ***Screening and selection***

55 Sources that were identified through the above mentioned search strategy were uploaded in  
56 Mendeley Reference Manager<sup>(23)</sup> and initial deduplication was done. Sources were then  
57 exported from Mendeley to Rayyan<sup>(24)</sup> web application for systematic reviews where second  
58 deduplication was conducted. The first and third authors (MC and HMvB) independently  
59  
60

1  
2  
3 performed title and abstract screening of the uploaded sources guided by the PCC and inclusion  
4 criteria. The authors included peer-reviewed sources on VR interventions that fit into the  
5 occupational therapy scope and were published in English between 2011 and 2021 from L-  
6 UMICs.<sup>(8)</sup> The second author (LvN) resolved conflicts and her vote was final in making the  
7 decision to include or exclude a source. A second project was opened in Rayyan<sup>(24)</sup> where  
8 sources that were screened for title and abstract were loaded for full text screening. The first  
9 and third authors (MC and HMvB) did full text screening of first three sources together before  
10 they independently screened the rest of the sources. Conflicts were discussed and resolved  
11 with input from the second author (LvN), and the inclusion or exclusion criteria was regularly  
12 checked. Figure 1 below is the PRISMA flow diagram illustrating the process of searching and  
13 selecting sources for inclusion in this review.  
14  
15  
16

17 [Figure 1: PRISMA Flow Diagram]  
18

### 19 ***Data extraction***

20  
21 Data were extracted from each of the twelve included sources using a data extraction form that  
22 was developed by the first author and independently reviewed by the second and third authors.  
23 The template for intervention description and replication (TIDieR) checklist<sup>(25)</sup> was  
24 incorporated in the data extraction form. Extracted data covered the following: author (s), year  
25 of publication, country of origin, aim/purpose, study population and sample size, methodology,  
26 VR intervention type, VR intervention principles, VR intervention strategies, outcomes of the  
27 interventions, main conclusions and type of mental health care settings. Also, a summary of  
28 the levels of evidence of included sources was presented. The extracted data was transferred to  
29 spreadsheet and all three authors reviewed the information.  
30  
31  
32

### 33 ***Data analysis***

34  
35 On conclusion of data extraction, a basic numerical and qualitative thematic analysis was done  
36 in Microsoft Excel. All three authors were involved in the analysis and met weekly on-line and  
37 through WhatsApp group to discuss analysis issues and ensure uniform procedure. Qualitative  
38 data was extracted to show geographical origins of sources, demographic profile and  
39 socioeconomic features of participants, as well as methodological features of the sources. All  
40 three authors individually read and inductively coded the data, creating provisional categories.  
41 During discussions among the authors categories were refined, and through deductive thematic  
42 analysis themes were identified by consensus.  
43  
44  
45

### 46 ***Ethics***

47 Ethical clearance for this study was not required as secondary data was utilised and there were  
48 no MHSUs involved.  
49

### 50 ***Patient and public involvement***

51 There was no patient or public involvement.  
52

## 53 **Results**

### 54 ***Characteristics of included sources***

55  
56 A total of 12 sources from four L-UMIC drawn from studies done in Africa, Asia and South  
57 America were included. The countries were South Africa – 8 sources, India – 2 sources, Brazil  
58 and Kenya – 1 source each. All 12 sources were published between 2011 and 2020. The total  
59  
60

1  
2  
3 number of study participants reported in the included sources was 1581, and only two sources  
4 reported the combined attrition of 108 participants. Age of the participants ranged from 18 to  
5 60 years. Four studies<sup>(22)(26)(27)(28)</sup> were conducted in urban settings, one in both urban and rural  
6 settings<sup>(29)</sup>, and the rest of the included sources did not report on this aspect. In terms of socio-  
7 economic status of the participants, two sources<sup>(26)(28)</sup> reported that participants were from low  
8 socio-economic status stratum, whereas the rest of the included sources did not state this  
9 component. Diagnoses reported in the sources were: schizophrenia, schizoaffective disorder,  
10 anxiety disorder, bipolar type I disorder, intellectual disability, major depression and obsessive-  
11 compulsive disorder.  
12  
13  
14

15 The included sources used the following study designs: qualitative design - 4, quantitative  
16 design – 3, mixed methods design – 2, and Delphi Method -1. Two sources did not clearly state  
17 the design used. Qualitative designs included action research, phenomenology, interpretive  
18 biography, multiple collaborative research and focus group interviews. Single blinded  
19 randomized control and longitudinal descriptive designs were employed in quantitative  
20 designs. Table 1 below is a summary of the characteristics of included sources.  
21  
22  
23  
24  
25  
26  
27  
28  
29  
30  
31  
32  
33  
34  
35  
36  
37  
38  
39  
40  
41  
42  
43  
44  
45  
46  
47  
48  
49  
50  
51  
52  
53  
54  
55  
56  
57  
58  
59  
60



Table 1: Characteristics of included sources

| Authors & year of publication     | Country & Region      | Study Design                                                                                    | Study Participants/target population                                                                                                                | Sample size                                                                              | Gender               | Age of the study participants/target population | Location      | Socio-economic status of the study participants/target population | Diagnosis of the study participants/target population                       |
|-----------------------------------|-----------------------|-------------------------------------------------------------------------------------------------|-----------------------------------------------------------------------------------------------------------------------------------------------------|------------------------------------------------------------------------------------------|----------------------|-------------------------------------------------|---------------|-------------------------------------------------------------------|-----------------------------------------------------------------------------|
| Adriana D.B. Vizzotto et al. 2016 | Brazil, South America | Randomized controlled, single blind pilot study comparing the OGI method with craft activities. | Patients with Treatment Resistant Schizophrenia                                                                                                     | 30                                                                                       | Male 24, female 5.   | 18 - 55                                         | Urban         | Not stated                                                        | Schizophrenia                                                               |
| Hester van Biljon et al. 2015     | South Africa, Africa  | Action research phenomenology                                                                   | Occupational therapists working in Gauteng's public healthcare, who were interested in vocational rehabilitation. Vocational rehabilitation experts | 127 Occupational Therapists and 39 Vocational Rehabilitation experts                     | Not stated           | Not stated                                      | Not stated    | Not stated                                                        | Not specified                                                               |
| Ikenna D. Ebuenyi et al. 2019     | Kenya, Africa         | A sequential mixed-method design                                                                | Persons with mental/psychosocial disabilities.                                                                                                      | 14 Individual interviews, 30 individuals in FGDs, 72 participated in quantitative study. | Males and females    | Mean age of 40 years                            | Not stated    | Not stated                                                        | Depression, schizophrenia, bipolar mood disorder                            |
| Chitra Khare et al 2020           | India, Asia           | Not specified                                                                                   | Psychiatric outpatients                                                                                                                             | 552                                                                                      | Male 311, female 231 | 18-60                                           | Rural & Urban | Not stated                                                        | schizophrenia, schizoaffective disorder, bipolar disorder, major depression |
| Reema Samuel, K. S. Jacob 2017    | India, Asia           | Narrative paper                                                                                 | Not stated                                                                                                                                          | Not stated                                                                               | Not stated           | Not stated                                      | Not stated    | Not stated                                                        | Not specified                                                               |
| Hester M van Biljon et al 2016    | South Africa, Africa  | A multi-collaborative                                                                           | Occupational therapists working in Gauteng's public healthcare, who                                                                                 | 14 VR TT group, 242 OT clinicians                                                        | Not stated           | Not stated                                      | Not stated    | Not stated                                                        | Not specified                                                               |

|                                                       |                      |                                                       |                                                                                                                                                                                                                                                                      |                                                                     |            |                               |            |                          |                                                                   |
|-------------------------------------------------------|----------------------|-------------------------------------------------------|----------------------------------------------------------------------------------------------------------------------------------------------------------------------------------------------------------------------------------------------------------------------|---------------------------------------------------------------------|------------|-------------------------------|------------|--------------------------|-------------------------------------------------------------------|
|                                                       |                      | action research approach                              | were interested in vocational rehabilitation. Vocational rehabilitation experts                                                                                                                                                                                      | in Gauteng public sector, 26 OT working in Academics. 39 VR experts |            |                               |            |                          |                                                                   |
| Tania Buys 2015                                       | South Africa, Africa | A Delphi technique                                    | Occupational Therapists                                                                                                                                                                                                                                              | 35                                                                  | Not stated | Not stated                    | Not stated | Not stated               | Not specified                                                     |
| Kreshnee Govender et al 2018                          | South Africa, Africa | Quantitative & Qualitative design using survey monkey | Qualified occupational therapists working in the private sector, those specializing in vocational rehabilitation in the private sector; working in health consulting and insurance sectors; occupational therapists involved in medico-legal work and work with RAF. | 180                                                                 | Not stated | Not stated                    | Not stated | Not stated               | Not specified                                                     |
| Occupational Therapy Association of South Africa 2020 | South Africa, Africa | Not stated                                            | Not stated                                                                                                                                                                                                                                                           | Not stated                                                          | Not stated | Not stated                    | Not stated | Not stated               | Injury, illness, impairment or congenital or acquired disability. |
| Madri Engelbrecht et al 2017                          | South Africa, Africa | Longitudinal descriptive design                       | Working age participants with a diagnosis of psychiatric disorder or intellectual disability                                                                                                                                                                         | Group A - 25. Group B - 56.                                         | Not stated | Working age but not specified | Urban      | Low socio-economic group | Psychiatric disability, intellectual disability.                  |
| Lana Van Niekerk et al 2011                           | South Africa, Africa | Focus group interview                                 | Service providers who had initiated SE programmes in the Cape                                                                                                                                                                                                        | 8                                                                   | Not stated | Not stated                    | Urban      | Not stated               | Not specified                                                     |
| Lana Van Niekerk et al 2015                           | South Africa, Africa | longitudinal descriptive design                       | People with mental disabilities receiving SE in the Western Cape Province                                                                                                                                                                                            | Group A 29, Group B 56.                                             | Not stated | Not stated                    | Urban      | Low socio-economic group | Intellectual disability, Psychiatric disability (Schizophrenia,   |

1  
2  
3  
4  
5  
6  
7  
8  
9  
10  
11  
12  
13  
14  
15  
16  
17  
18  
19  
20  
21  
22  
23  
24  
25  
26  
27  
28  
29  
30  
31  
32  
33  
34  
35  
36  
37  
38  
39  
40  
41  
42  
43  
44  
45  
46

|  |  |  |  |  |  |  |  |  |  |                                       |
|--|--|--|--|--|--|--|--|--|--|---------------------------------------|
|  |  |  |  |  |  |  |  |  |  | Schizoaffective disorder, Bipolar I). |
|--|--|--|--|--|--|--|--|--|--|---------------------------------------|

For peer review only

### ***Level of evidence of included sources***

Levels of scientific evidence can be reliably used to summarize the quality of literature. There are five levels of scientific evidence.<sup>(30)</sup> Level 1 is the highest and it includes randomized control trials. Levels 2 and 3 include cohort and case control studies respectively, whereas level 4 encompasses non-experimental observational studies, case reports and case series.<sup>(30)</sup> Narrative reviews and expert opinions comprise the lowest level of scientific evidence i.e. level 5. In this study, one source by Vizzotto et al<sup>(22)</sup> is level 1, two sources by Engelbrecht et al<sup>(26)</sup> and van Niekerk et al<sup>(28)</sup> are level 2, and 7 sources<sup>(13,27,31–35)</sup> are level five. Two sources<sup>(29,36)</sup> did not specify methodology used.

### ***Review findings***

The section presents the scoping review findings covering VR intervention types, VR intervention principles and outcomes, and recommendations from the included sources. A summary of the review findings is attached as Annex C (supplementary file 3).

#### ***(i) Intervention types***

The included sources reported different VR types. Supported employment was the most common VR intervention cited by four sources.<sup>(29)(26)(27)(28)</sup> This is a VR intervention type that promotes the inclusion of persons with disabilities in competitive employment.<sup>(28)</sup> It is based on the assumption that people with the most severe disabilities can be integrated into competitive employment if they receive the right support.<sup>(28)</sup> The ongoing support can be provided by family members of the MHSU, the employer, occupational therapist or a job coach.<sup>(29)(28)(26)</sup>

Two sources<sup>(13)(36)</sup> categorized VR intervention types into six categories that were quite similar. These were: (i) prevention, (ii) screening, (iii) assessment, (iv) intervention, (v) placement, and (vi) follow-up. Prevention included providing educative services for the prevention of injury at work, to create an awareness of good work practice, as well as avoiding development and/or worsening of a condition. Screening entailed a short prescriptive process to filter and refer MHSUs to more specialized occupational therapists or facilities, whereas intervention services were programs aimed at correcting or compensating for ability to work deficits.<sup>(13)(36)</sup> Van Biljon et al<sup>(13)</sup> stated that placement services focus on the return of MHSUs to their own, alternative or new work area in the open labour market. Placement also included placement of MHSUs in sheltered or protected workshops.<sup>(13)</sup> Follow-up was done for MHSUs who used VR services and could be done with employers, referral sources, family members of MHSUs and MHSUs themselves.<sup>(13)</sup>

Case management and Goal Management Training (GMT) methods were also identified as possible VR intervention methods.<sup>(22)(34)</sup> Case management was utilized as an early intervention approach in VR of MHSUs once there had been an extended period of absence from work or a high rate of absence from work due to illness.<sup>(34)</sup> It involves developing a care plan, reskilling/training to aid in work re-entry, and work visits to liaise with employer to aid in the transition of the MHSU back to work.<sup>(34)</sup> Vizzotto et al<sup>(22)</sup> tested the efficacy of Occupational Goal Intervention Method for the improvement of executive functioning in MHSUs with Treatment Resistant Schizophrenia(TRS). This intervention was delivered over 15 weeks via 30 sessions with each session lasting 90 minutes. Focus of the intervention was on activities of daily living and instrumental activities of daily living including money

1  
2  
3 management and use of transportation. Their study concluded that Occupational Goal  
4 Intervention Method appeared to improve social and functional aspects of MHSUs with TRS.  
5 Other VR intervention types identified in this review were job seeker programs and related  
6 support, prevocational skills training and support, and social networks.<sup>(35)(31)</sup>  
7  
8

### 9 *(ii) Intervention principles*

10 Five out of the 12 included sources stated a number of principles applied in VR.<sup>(32)(33)(34)(27)(28)</sup>  
11 Samuel and Jacob<sup>(32)</sup> in their study on the role of occupational therapy in bridging the gap  
12 between symptomatic improvement and functional recovery highlighted the following three  
13 principles; (i) patient and family empowerment, (ii) focus on achieving functional recovery,  
14 and (iii) optimizing the fit between an individual's abilities and the environmental demands.  
15 Buys<sup>(33)</sup> identified five principles in her study on professional competencies in VR, namely;  
16 client centered, objectivity, adaptability, professionalism and respect. Planning with the client,  
17 client advocacy and on-going individualized support were the principles specifically identified  
18 for case management and supported employment.<sup>(34)(28)</sup> Van Niekerk et al<sup>(27)</sup> further reiterated  
19 the need to support MHSU goals and to empower them with choices and information, and they  
20 highlighted that support should be 'no more than needed and no less than necessary'.  
21  
22  
23

### 24 *(iii) Intervention strategies*

25 All 12 included sources presented various VR intervention strategies. Khare et al<sup>(29)</sup> identified  
26 the following strategies; teaching illness self-management skills, systematic involvement of  
27 families and social networks to help with job finding, collaboration on mental illness  
28 management, and facilitating work in family business. Van Niekerk et al<sup>(27)</sup> and Engelbrecht  
29 et al<sup>(26)</sup> reported similar VR intervention strategies in their studies. These were job analysis and  
30 matching, job finding, job coaching, trial placement, simulated work, work in protective  
31 factories and sheltered workshops. Job analysis and matching involved evaluation of  
32 employment potential and goodness of job fit. Job advocacy at the job site with employers and  
33 co-workers was a strategy utilized in supported employment. Work visits were done to observe  
34 real work, to discuss reasonable accommodation and to assist with performance appraisals.  
35 Engelbrecht et al<sup>(26)</sup> further identified personal life skills training as an essential component of  
36 VR strategy. The personal life skills deemed essential in VR included money handling,  
37 grooming, use of transportation, time management and communication.  
38  
39  
40  
41

42 The Occupational Therapy Association of South Africa (OTASA)<sup>(36)</sup> position paper on VR  
43 stated a number of VR strategies that are applicable in various settings including mental  
44 healthcare settings. These strategies included sheltered workshops, entrepreneurship and self-  
45 employment initiatives, vocational guidance and counseling, as well as work adaptation. In  
46 addition, Buys<sup>(33)</sup> identified job description review, work hardening, work conditioning, stress  
47 management and job seeking skills training as other VR strategies.  
48  
49

### 50 *(iv) Intervention outcomes*

51 VR intervention outcomes were reported for Supported Employment and Occupational Goal  
52 Intervention Method. Participants who engaged in supported employment earned more and  
53 worked more hours per month than those who had had prevocational training.<sup>(27)</sup> More so,  
54 supported employed allowed MHSUs to integrate into mainstream society, provided income  
55 and arena for social and personal development including improved self-esteem. Improved  
56 income lessens the economic burden for government. Reduction in the consumption of mental  
57 health services was reported for MHSUs who entered employment.<sup>(26)</sup> A study by Adriana et  
58  
59  
60

1  
2  
3 al<sup>(22)</sup> showed that Occupational Goal Intervention Method appeared to improve social and  
4 functional aspects of patients with Treatment Resistant Schizophrenia.  
5

#### 6 (v) *Summary of conclusions and recommendations*

7 Overall the included sources emphasized the need for contextually relevant vocational  
8 rehabilitation practice and advocated for the adoption of supported employment VR  
9 intervention for MHSUs. Van Biljon et al<sup>(35)</sup> concluded in their study by stating that having a  
10 comprehensive and contextually relevant tool that effectively indicate what VR services look  
11 like will be helpful to occupational therapists offering VR services in both public healthcare  
12 and in private practices. Khare et al<sup>(29)</sup> suggested in their conclusion that attention should be  
13 paid to adapting models of VR to the cultural context of developing countries to improve the  
14 employment outcomes of persons with serious mental illness. Buys<sup>(33)</sup> stressed the need for the  
15 occupational therapy profession to ensure that it provides competent, professional and  
16 contextually relevant VR services to clients which enables them to fulfil their roles as  
17 independent citizens. Similarly, the OTASA<sup>(36)</sup> position paper on VR concluded that the type  
18 of VR service that occupational therapists in South Africa offer should be dictated by the  
19 vocational needs and aspirations, social structures and contextual realities of MHSUs.  
20  
21  
22  
23

24 Three of the included sources concluded by advocating for supported employment as a model  
25 of choice in VR<sup>(26)(27)(28)</sup>. Engelbrecht et al<sup>(26)</sup> concluded that supported employment was cost  
26 effective and would combat unemployment, work towards poverty reduction and redress  
27 inequality for people with mental disabilities, hence it was a viable strategy for return to work  
28 endeavors. In addition to proposing supported employment as a model of choice to drive the  
29 process of economic empowerment for persons facing disabling conditions, van Niekerk et  
30 al<sup>(27)</sup> recommended a holistic approach to supported employment because it has components  
31 such as placement in suitable work and reasonable accommodation that do not necessarily  
32 follow a linear process. Van Niekerk<sup>(28)</sup> recommended the need for providers of supported  
33 employment to modify approaches in order to meet contextual realities.  
34  
35  
36  
37  
38

## 39 Discussion

40 This study set out to scope the literature on VR for MHSUs with chronic mental illness, in  
41 occupational therapy, in L-UMICs. The study further identified the different types, principles  
42 and strategies of institution-based VR interventions for MHSUs. Types of vocational  
43 rehabilitation intervention identified included supported employment, case management and  
44 prevocational skills training. Client centeredness, support and empowerment were the key  
45 vocational rehabilitation principles identified. Teaching illness self-management, job analysis  
46 and matching, job coaching, trial placement, and vocational guidance and counseling, and work  
47 hardening were the main intervention strategies reported.  
48  
49

50 Overall, the majority of included sources were from South Africa with only one source from  
51 Kenya completing the representation from African continent. Only two sources from India and  
52 one from Brazil represented the Asian and South American continents respectively. The low  
53 number of sources possibly confirm limited research in the field of VR for MHSUs with  
54 chronic mental illness in L-UMIC, which could be attributed to a couple of factors. There is a  
55 high patient-therapist ratio in the field of mental health in L-UMICs, thus occupational  
56 therapists do not have sufficient time and skills to document and publish their work. Another  
57 possible contributing factor to low number of sources could be the limited resources such as  
58  
59  
60

1  
2  
3 funding, publishing journals and tertiary institutions providing occupational therapy training.  
4 As a result, occupational therapists cannot afford the cost of publishing in journals from high  
5 income countries and they lack academic support to help with their academic writing skills and  
6 ethical clearance for their research.  
7

8  
9 The main VR types identified in African and Asian sources were supported employment, case  
10 management, prevocational and vocational skills training. Goal Management Training  
11 Method<sup>(22)</sup> was the only intervention type identified from the one included source from South  
12 American continent. Using the categorization of VR types suggested by Van Biljon et al<sup>(13)</sup>,  
13 supported employment fits in two categories, intervention and placement. Prevocational and  
14 vocational skills training fall under traditional VR intervention, which is a stepwise path that  
15 focuses on assessment and job matching prior to job search.<sup>(37)</sup> The included sources did not  
16 specify institution-based VR interventions. One possible reason for this observation could be  
17 due to the current set-up of occupational therapy practice in L-UMIC. Occupational therapists  
18 tend to be institution based regardless of the VR intervention type that they provide. Also,  
19 institution-based VR in L-UMIC lack human and capital resources such as therapists and  
20 transport needed to move beyond the institutions. Generally, due to a variety of reasons as  
21 alluded above, there is dearth of documented evidence supporting occupational therapists  
22 involvement in VR.<sup>(38)</sup>  
23  
24  
25  
26

27 Vocational rehabilitation intervention principles identified in this review focused on client  
28 centredness, achieving functional recovery, as well as advocating for client and family support.  
29 These principles are well enshrined within the general occupational therapy intervention  
30 principles. Client centredness is a key element of occupational therapy practice that demands  
31 for the formation of partnerships with MHSUs, which allows for the exploration,  
32 understanding, and promotion of engagement in their chosen or expected occupations including  
33 work<sup>(39)</sup>. Applying the principle of client centredness in VR intervention five rules should be  
34 considered based on a framework suggested by Gretschel and Galvaan.<sup>(39)</sup> MHSUs should be  
35 considered holistically, they should be viewed as experts of their own occupational  
36 engagement, their values and goals must be respected, therapist-person partnerships should be  
37 facilitative and not directive, and contextual congruence must be inherent in the VR  
38 interventions designed.<sup>(39)</sup> Supportive relationship is another VR principle that is integral to the  
39 success of VR interventions. Occupational therapists, employers, coworkers and family  
40 members provide hope, empathy and encouragement, all resulting in enhanced confidence at  
41 work, increased work-related skills and greater ability of MHSUs to fit within a particular  
42 work/employment situation.<sup>(40)</sup> Also, given the reality that mental disability tends to be  
43 episodic and fluctuates over time, and due to limited understanding of mental illness in L-  
44 UMICs, it is imperative that VR intervention is structured to offer on-going support in and  
45 beyond institution boundaries.<sup>(11)</sup>  
46  
47  
48  
49  
50

51 Regarding VR intervention strategies, the included sources clearly focused on simultaneously  
52 placing MHSUs in competitive work and providing support through networks and negotiating  
53 with employer and managing symptoms. This highlights a shift from the traditional VR  
54 strategies which focus on train-first-then-place. However, this strategy may pose a challenge  
55 in L-UMICs where unemployment rates are high resulting in MHSUs competing for  
56 employment with the mainstream community.<sup>(12)</sup> Self-employment initiatives is therefore a  
57 realistic VR intervention strategy.<sup>(38)</sup> Occupational therapists are sufficiently skilled to  
58 facilitate self-employment, and can contribute towards alleviating unemployment among  
59  
60

1  
2  
3 MHSUs with chronic mental illness by identifying potential and encouraging entrepreneurship  
4 and self-employment opportunities.<sup>(38)</sup> Swart and Buys<sup>(11)</sup> contend that in addition to the  
5 various VR intervention strategies that occupational therapists utilise, traditional psychosocial  
6 intervention such as stress management, conflict management and relaxation therapy should  
7 be considered depending on client needs.  
8  
9

### 10 *Implications for research*

11  
12 The findings of the scoping review provide the authors with thematic areas to consider when  
13 developing the semi-structured interview guide that will be utilized to explore factors to be  
14 considered for VR intervention in the Namibian context. The proposed thematic areas are; (i)  
15 VR interventions applicable to Namibia context, (ii) VR principles to be applied, (iii) VR  
16 intervention strategies, (iv) VR stakeholders to be engaged in Namibia including their roles,  
17 and (v) general recommendations for the implementation of VR in Namibia for MHSUs with  
18 chronic mental illness.  
19  
20

### 21 *Implications for practice*

22  
23 In terms of occupational therapy practice in VR, the findings of this review highlight the need  
24 to shift from the current practice to *place and train* models in L-UMIC. Institution based VR  
25 should take shorter time compared to the traditional VR approach and rather focus on  
26 identifying potential areas for placement and support in the natural work contexts for MHSUs.  
27 In the context of L-UMICs where unemployment rates are high, VR intervention may need to  
28 focus on strategies that support self-employment initiatives. Client centeredness is a key  
29 principle in planning for VR interventions and ensuring that intended VR outcomes are  
30 achieved. There is a need for occupational therapists to have insight into and adapt vocational  
31 rehabilitation intervention strategies to the demographic and socio-economic context of the L-  
32 UMIC in which they practice.<sup>(38)</sup> Occupational therapists and other VR stakeholders should  
33 provide the right level of individual support to MHSUs in VR and be able to adapt this support  
34 according to the needs of the client.  
35  
36  
37  
38

### 39 *Strengths and limitations*

40  
41 Our study has several strengths. The authors followed a scoping review protocol<sup>(8)</sup> that was  
42 subject to peer review and was published in July 2021. Pre-scheduled weekly meetings among  
43 the three authors were used to promote momentum and discussions throughout the project. In  
44 addition, the authors used human and other library resources from two different universities,  
45 University of Namibia and Stellenbosch University. However, there are also limitations to the  
46 present study. First, authors did not include studies published in languages other than English,  
47 therefore we concede that sources from L-UMIC in languages such as Spanish could have been  
48 missed. Second, due to the dearth of publications from L-UMIC the evidence presented in this  
49 article cannot be seen to represent VR for MHSUs in occupational therapy globally. The third  
50 limitation is that no quality appraisal was done on the included sources.  
51  
52  
53

### 54 **Conclusion**

55 This review mapped the current evidence in VR for MHSUs with chronic mental illness in L-  
56 UMICs. Review findings indicate the need for institution based occupational therapists in L-  
57 UMICs to shift from a traditional vocational rehabilitation approach to interventions that do  
58 not cease upon discharge but include place-train-and-support approaches. VR interventions  
59 should extend their focus on supporting MHSUs in their natural work settings or potential work  
60



1  
2  
3 settings. Such intervention should include factors such as getting to and from work, job seeking  
4 skills, upskilling within the larger labour market, and it should include placement  
5 considerations such as self-employment and unpaid work. The authors recommend further  
6 studies on VR interventions and outcomes for MHSUs in low resourced communities focusing  
7 on practical and unique realities experienced by such communities. More so, it is imperative  
8 that researchers in the field of occupational therapy, mental health and VR strive for levels 1  
9 and 2 of scientific evidence to inform practice.  
10  
11  
12  
13

### 14 **Contributors**

15  
16 Three authors were involved in conceptualizing, drafting and editing this scoping review. The  
17 first author, Munyaradzi Chimara, conducted this scoping review as part of his doctoral studies.  
18 Second and third authors, Professor Lana van Niekerk and Dr Hester Maria van Biljon  
19 respectively, were involved as academic supervisors in all the stages followed in this scoping  
20 review study.  
21  
22

### 23 **Funding**

24  
25 At the time of submission, no funding was received from any agency or organisation for  
26 supporting this research.  
27

### 28 **Competing interests**

29  
30 The authors hereby declare that there is no conflict of interest from the publication of this paper.  
31

### 32 **Data availability statement**

33  
34 No additional data are available.  
35  
36

### 37 **References**

- 38 1. Patel V. Mental health in low- and middle-income countries. *Br Med Bull*. 2007;81–  
39 82(1):81–96.
- 40 2. Chibanda D. The future of psychiatry in Africa—thinking outside the box. *The Lancet*  
41 *Psychiatry*. 2017;4(10):741–2.
- 42 3. World Health Organisation. *Mental health atlas 2017*. Geneva; 2018.
- 43 4. Nguyen T, Holton S, Tran T, Fisher J. Informal mental health interventions for people  
44 with severe mental illness in low and lower middle-income countries: A systematic  
45 review of effectiveness. *Int J Soc Psychiatry*. 2019;65(3):194–206.
- 46 5. World Bank. World Bank Country and Lending Groups [Internet]. World Bank Group.  
47 2021 [cited 2021 Sep 21]. Available from:  
48 [https://datahelpdesk.worldbank.org/knowledgebase/articles/906519-world-bank-](https://datahelpdesk.worldbank.org/knowledgebase/articles/906519-world-bank-country-and-lending-groups)  
49 [country-and-lending-groups](https://datahelpdesk.worldbank.org/knowledgebase/articles/906519-world-bank-country-and-lending-groups)
- 50 6. Bachrach, Leona L. Defining chronic mental illness.pdf. *Am Psychiatry Assoc*.  
51 1988;39(4):383–8.
- 52 7. American Psychiatric Association. *Diagnostic and statistical manual of mental*  
53 *disorders*. Fifth. Washington, London; 2013.  
54  
55  
56  
57  
58  
59  
60

- 1
  - 2
  - 3
  - 4
  - 5
  - 6
  - 7
  - 8
  - 9
  - 10
  - 11
  - 12
  - 13
  - 14
  - 15
  - 16
  - 17
  - 18
  - 19
  - 20
  - 21
  - 22
  - 23
  - 24
  - 25
  - 26
  - 27
  - 28
  - 29
  - 30
  - 31
  - 32
  - 33
  - 34
  - 35
  - 36
  - 37
  - 38
  - 39
  - 40
  - 41
  - 42
  - 43
  - 44
  - 45
  - 46
  - 47
  - 48
  - 49
  - 50
  - 51
  - 52
  - 53
  - 54
  - 55
  - 56
  - 57
  - 58
  - 59
  - 60
8. Chimara M, Van Niekerk L, Van Biljon HM. Vocational rehabilitation for mental health service users with chronic mental illness in low-income to upper-middle-income countries: a scoping review protocol. *BMJ Open*. 2021;1–6.
9. Swart L, Buys T. Vocational Rehabilitation in Psychiatry and Mental Health. In: Crouch R, Alers V, editors. *Occupational Therapy in Psychiatry and Mental Health*. Fifth. Chichester: Wiley Blackwell; 2014. p. 175–93.
10. Ross J. *Occupational Therapy and Vocational Rehabilitation*. West Sussex: John Wiley & Sons; 2007.
11. Swart L, Buys T. Vocational Rehabilitation in Psychiatry and Mental Health. In: *Occupational Therapy in Psychiatry and Mental Health*. 2014. p. 175–93.
12. Namibian Statistics Agency. The Namibia Labour Force Survey 2014 Report [Internet]. Windhoek; 2019. Available from: [http://www.ilo.org/wcmsp5/groups/public/---africa/--ro-addis\\_ababa/---ilo-pretoria/documents/publication/wcms\\_368595.pdf](http://www.ilo.org/wcmsp5/groups/public/---africa/--ro-addis_ababa/---ilo-pretoria/documents/publication/wcms_368595.pdf)
13. van Biljon HM, Casteljiën D, J du Toit SH, Soulsby L. Opinions of occupational therapists on the positioning of vocational rehabilitation services in Gauteng Public Healthcare. *South African J Occup Ther*. 2016;46(1):45–52.
14. Suijkerbuijk YB, Schaafsma FG, van Mechelen JC, Ojajärvi A, Corbière M, Anema JR. Interventions for obtaining and maintaining employment in adults with severe mental illness, a network meta-analysis. *Cochrane Database Syst Rev* [Internet]. 2017;(9). Available from: <http://dx.doi.org/10.1002/14651858.CD011867.pub2>
15. Clubhouse International. How clubhouses work [Internet]. Clubhouse International. 2021. Available from: <https://clubhouse-intl.org/resources/how-clubhouses-work/>
16. Lloyd C. Vocational rehabilitation and mental health [Internet]. Vol. 369, *Journal of Petrology*. Wiley Blackwell; 2010. 1689–1699 p. Available from: <http://dx.doi.org/10.1016/j.jsames.2011.03.003><https://doi.org/10.1016/j.gr.2017.08.001><http://dx.doi.org/10.1016/j.precamres.2014.12.018><http://dx.doi.org/10.1016/j.precamres.2011.08.005><http://dx.doi.org/10.1080/00206814.2014.902757><http://dx>.
17. Arksey H, O’Malley L. Scoping studies: Towards a methodological framework. *Int J Soc Res Methodol Theory Pract*. 2005;8(1):19–32.
18. Levac D, Colquhoun H, O’Brien KK, Brien KKO. Scoping studies: advancing the methodology. *Implement Sci*. 2010;1–18.
19. Colquhoun HL, Levac D, O’Brien KK, Straus S, Tricco AC, Perrier L, et al. Scoping reviews: Time for clarity in definition, methods, and reporting. *J Clin Epidemiol* [Internet]. 2014;67(12):1291–4. Available from: <http://dx.doi.org/10.1016/j.jclinepi.2014.03.013>
20. Tricco AC, Lillie E, Zarin W, O’Brien KK, Colquhoun H, Levac D, et al. PRISMA Extension for Scoping Reviews (PRISMA-ScR): Checklist and Explanation. *Ann Intern Med* [Internet]. 2018; Available from: <http://annals.org/article.aspx?doi=10.7326/M18-0850>
21. Institute TJB. The Joanna Briggs Institute Reviewers’ Manual 2015 Methodology for JBI Scoping Reviews [Internet]. The Joanna Briggs Institute; 2015. Available from: [www.joanabriggs.org](http://www.joanabriggs.org)

- 1
  - 2
  - 3
  - 4
  - 5
  - 6
  - 7
  - 8
  - 9
  - 10
  - 11
  - 12
  - 13
  - 14
  - 15
  - 16
  - 17
  - 18
  - 19
  - 20
  - 21
  - 22
  - 23
  - 24
  - 25
  - 26
  - 27
  - 28
  - 29
  - 30
  - 31
  - 32
  - 33
  - 34
  - 35
  - 36
  - 37
  - 38
  - 39
  - 40
  - 41
  - 42
  - 43
  - 44
  - 45
  - 46
  - 47
  - 48
  - 49
  - 50
  - 51
  - 52
  - 53
  - 54
  - 55
  - 56
  - 57
  - 58
  - 59
  - 60
22. Vizzotto ADB, Celestino DL, Buchain PC, Oliveira AM, Oliveira GMR, Di Sarno ES, et al. A pilot randomized controlled trial of the Occupational Goal Intervention method for the improvement of executive functioning in patients with treatment-resistant schizophrenia. *Psychiatry Res* [Internet]. 2016;245(April):148–56. Available from: <http://dx.doi.org/10.1016/j.psychres.2016.05.011>
23. Mendeley. Mendeley Reference Manager. Elsevier; 2020.
24. Mourad O, Hossam H, Zbys F, Ahmed E. Rayyan Intelligent Systematic Review. 2020.
25. Hoffmann TC, Glasziou PP, Boutron I, Milne R, Perera R, Moher D, et al. Better reporting of interventions: Template for intervention description and replication (TIDieR) checklist and guide. *BMJ* [Internet]. 2014;348(March):1–12. Available from: <http://dx.doi.org/doi:10.1136/bmj.g1687>
26. Engelbrecht M, Uct OT, Ot B, Coetzee Z, Ot ND, Uct OT, et al. Supported Employment for people with mental disabilities in South Africa: cost calculation of service utilisation. 2017;47(2):11–6.
27. Van Niekerk L, Coetzee Z, Engelbrecht M, Hajwani Z, Landman S, Motimele M, et al. Supported employment: Recommendations for successful implementation in South Africa. *Support Employ Recomm Success Implement South Africa*. 2011;41(3):85–90.
28. Van Niekerk L, Coetzee Z, Engelbrecht M, Hajwani Z, Terreblanche S. Time utilisation trends of supported employment services by persons with mental disability in South Africa. *Work*. 2015;52(4):825–33.
29. Khare C, Mueser KT, Fulford D, Watve VG, Karandikar NJ, Khare S, et al. Employment functioning in people with severe mental illnesses living in urban vs. rural areas in India. *Soc Psychiatry Psychiatr Epidemiol* [Internet]. 2020;55(12):1593–606. Available from: <https://www.scopus.com/inward/record.uri?eid=2-s2.0-85086778582&doi=10.1007%2Fs00127-020-01901-0&partnerID=40&md5=6069171aa788c101228e8e27298643f8>
30. Bowen DM., Forrest JL. Translating Research for Evidence-Based Practice.: EBSCOhost. 2017;(February). Available from: <https://web-b-ebSCOhost-com.lopes.idm.oclc.org/ehost/pdfviewer/pdfviewer?vid=1&sid=f204616b-9cae-42e5-a8c2-7175df7b56ad%40sessionmgr101>
31. Ebuenyi I. Inclusive employment: understanding the barriers to and facilitators of employment for persons with mental disability in East Africa [Internet]. 2019. Available from: [https://research.vu.nl/files/87463718/complete\\_dissertation.pdf](https://research.vu.nl/files/87463718/complete_dissertation.pdf)
32. Samuel R, Jacob KS. Occupational therapy in India: Focus on functional recovery and need for empowerment. *Indian J Psychiatry*. 2018;59(4):2017–8.
33. Buys T. Professional competencies in vocational rehabilitation: Results of a Delphi study. *South African J Occup Ther*. 2015;45(3):48–54.
34. Govender K, Christopher C, Lingah T. The role of the occupational therapist in case management in South Africa. *South African J Occup Ther*. 2018;48(2):12–9.
35. Biljon H Van, Ufs BOT, Ufs MOT, Pret MOT. An Action Research Approach to Profile an Occupational Therapy VR SERVICE IN PUBLIC HEALTHCARE. 2015;45(3):40–7.

- 1  
2  
3 36. OTASA. Position Statement on Vocational Rehabilitation. *South African J Occup Ther.* 2017;47(3):63–4.  
4  
5  
6 37. Vukadin M, Schaafsma FG, Vlaar SJ, van Busschbach JT, van de Ven PM, Michon  
7 HWC, et al. Work Motivation and Employment Outcomes in People with Severe Mental  
8 Illness. *J Occup Rehabil* [Internet]. 2019;29(4):803–9. Available from:  
9 [https://www.scopus.com/inward/record.uri?eid=2-s2.0-](https://www.scopus.com/inward/record.uri?eid=2-s2.0-85066785183&doi=10.1007%2Fs10926-019-09839-0&partnerID=40&md5=4914cf2e4cb7005000d27385ac9c8f71)  
10 [85066785183&doi=10.1007%2Fs10926-019-09839-](https://www.scopus.com/inward/record.uri?eid=2-s2.0-85066785183&doi=10.1007%2Fs10926-019-09839-0&partnerID=40&md5=4914cf2e4cb7005000d27385ac9c8f71)  
11 [0&partnerID=40&md5=4914cf2e4cb7005000d27385ac9c8f71](https://www.scopus.com/inward/record.uri?eid=2-s2.0-85066785183&doi=10.1007%2Fs10926-019-09839-0&partnerID=40&md5=4914cf2e4cb7005000d27385ac9c8f71)  
12  
13 38. Monareng LL, Franzsen D, van Biljon H. A survey of occupational therapists’  
14 involvement in facilitating self-employment for people with disabilities. *South African*  
15 *J Occup Ther.* 2018;48(3):52–7.  
16  
17 39. Gretschel P, Galvaan R. Using a client-centred approach in occupational therapy. In:  
18 Dsouza SA, Gailvaan R, Ramugondo EL, editors. *Concepts in Occupational Therapy*  
19 *Understanding Southern Perspectives*. First. Manipal: Manipal University Press; 2017.  
20 p. 237–47.  
21  
22 40. Dunn EC, Wewiorski NJ, Rogers ES. A qualitative investigation of individual and  
23 contextual factors associated with vocational recovery among people with serious  
24 mental illness. *Am J Orthopsychiatry.* 2010;80(2).  
25  
26  
27  
28

## 29 **List of Figures**

### 30 **Figure 1: PRISMA flow diagram**

31  
32  
33  
34  
35  
36  
37  
38  
39  
40  
41  
42  
43  
44  
45  
46  
47  
48  
49  
50  
51  
52  
53  
54  
55  
56  
57  
58  
59  
60

Figure 1; PRISMA flow diagram

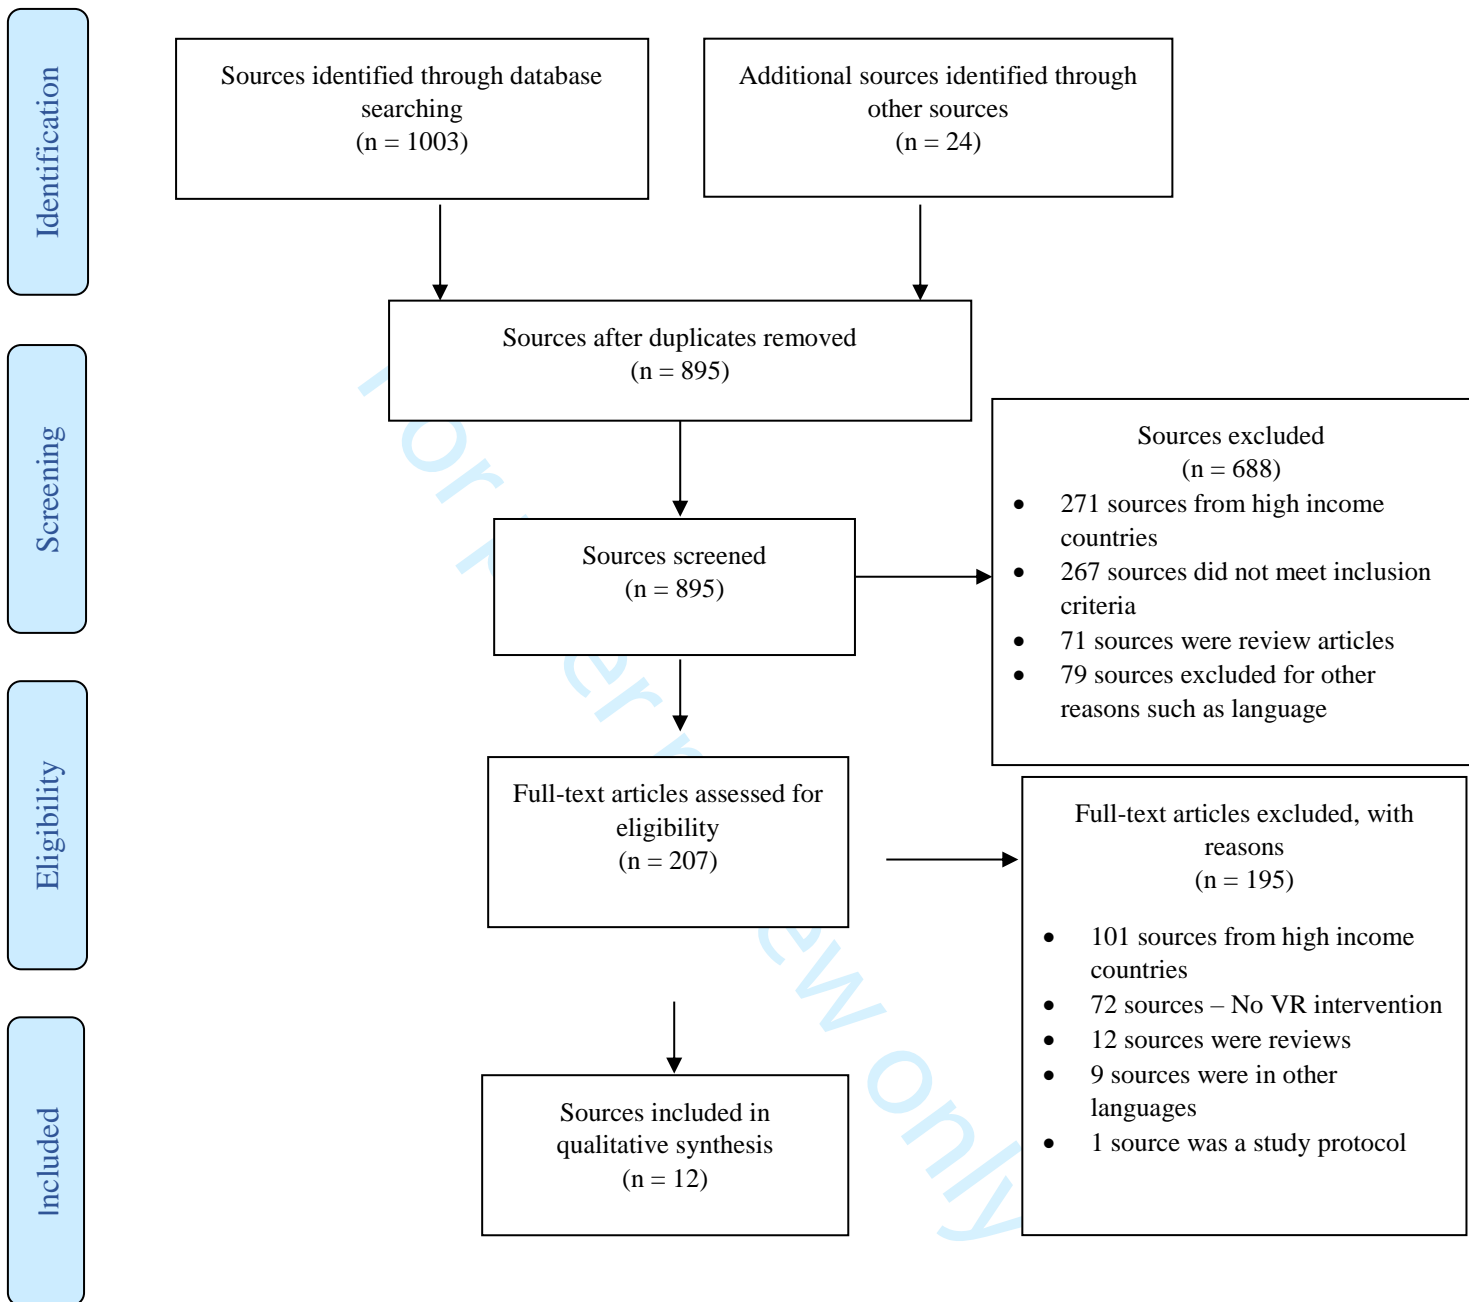

Prisma flow diagram for a scoping review exploring vocational rehabilitation interventions for mental health service users with chronic mental illness in low-income to upper-middle-income countries.

## Preferred Reporting Items for Systematic reviews and Meta-Analyses extension for Scoping Reviews (PRISMA-ScR) Checklist

| SECTION                                               | ITEM | PRISMA-ScR CHECKLIST ITEM                                                                                                                                                                                                                                                                                  | REPORTED ON PAGE # |
|-------------------------------------------------------|------|------------------------------------------------------------------------------------------------------------------------------------------------------------------------------------------------------------------------------------------------------------------------------------------------------------|--------------------|
| <b>TITLE</b>                                          |      |                                                                                                                                                                                                                                                                                                            |                    |
| Title                                                 | 1    | Identify the report as a scoping review.                                                                                                                                                                                                                                                                   |                    |
| <b>ABSTRACT</b>                                       |      |                                                                                                                                                                                                                                                                                                            |                    |
| Structured summary                                    | 2    | Provide a structured summary that includes (as applicable): background, objectives, eligibility criteria, sources of evidence, charting methods, results, and conclusions that relate to the review questions and objectives.                                                                              |                    |
| <b>INTRODUCTION</b>                                   |      |                                                                                                                                                                                                                                                                                                            |                    |
| Rationale                                             | 3    | Describe the rationale for the review in the context of what is already known. Explain why the review questions/objectives lend themselves to a scoping review approach.                                                                                                                                   |                    |
| Objectives                                            | 4    | Provide an explicit statement of the questions and objectives being addressed with reference to their key elements (e.g., population or participants, concepts, and context) or other relevant key elements used to conceptualize the review questions and/or objectives.                                  |                    |
| <b>METHODS</b>                                        |      |                                                                                                                                                                                                                                                                                                            |                    |
| Protocol and registration                             | 5    | Indicate whether a review protocol exists; state if and where it can be accessed (e.g., a Web address); and if available, provide registration information, including the registration number.                                                                                                             |                    |
| Eligibility criteria                                  | 6    | Specify characteristics of the sources of evidence used as eligibility criteria (e.g., years considered, language, and publication status), and provide a rationale.                                                                                                                                       |                    |
| Information sources*                                  | 7    | Describe all information sources in the search (e.g., databases with dates of coverage and contact with authors to identify additional sources), as well as the date the most recent search was executed.                                                                                                  |                    |
| Search                                                | 8    | Present the full electronic search strategy for at least 1 database, including any limits used, such that it could be repeated.                                                                                                                                                                            |                    |
| Selection of sources of evidence†                     | 9    | State the process for selecting sources of evidence (i.e., screening and eligibility) included in the scoping review.                                                                                                                                                                                      |                    |
| Data charting process‡                                | 10   | Describe the methods of charting data from the included sources of evidence (e.g., calibrated forms or forms that have been tested by the team before their use, and whether data charting was done independently or in duplicate) and any processes for obtaining and confirming data from investigators. |                    |
| Data items                                            | 11   | List and define all variables for which data were sought and any assumptions and simplifications made.                                                                                                                                                                                                     |                    |
| Critical appraisal of individual sources of evidence§ | 12   | If done, provide a rationale for conducting a critical appraisal of included sources of evidence; describe the methods used and how this information was used in any data synthesis (if appropriate).                                                                                                      |                    |
| Synthesis of results                                  | 13   | Describe the methods of handling and summarizing the data that were charted.                                                                                                                                                                                                                               |                    |



| SECTION                                       | ITEM | PRISMA-ScR CHECKLIST ITEM                                                                                                                                                                       | REPORTED ON PAGE # |
|-----------------------------------------------|------|-------------------------------------------------------------------------------------------------------------------------------------------------------------------------------------------------|--------------------|
| <b>RESULTS</b>                                |      |                                                                                                                                                                                                 |                    |
| Selection of sources of evidence              | 14   | Give numbers of sources of evidence screened, assessed for eligibility, and included in the review, with reasons for exclusions at each stage, ideally using a flow diagram.                    |                    |
| Characteristics of sources of evidence        | 15   | For each source of evidence, present characteristics for which data were charted and provide the citations.                                                                                     |                    |
| Critical appraisal within sources of evidence | 16   | If done, present data on critical appraisal of included sources of evidence (see item 12).                                                                                                      |                    |
| Results of individual sources of evidence     | 17   | For each included source of evidence, present the relevant data that were charted that relate to the review questions and objectives.                                                           |                    |
| Synthesis of results                          | 18   | Summarize and/or present the charting results as they relate to the review questions and objectives.                                                                                            |                    |
| <b>DISCUSSION</b>                             |      |                                                                                                                                                                                                 |                    |
| Summary of evidence                           | 19   | Summarize the main results (including an overview of concepts, themes, and types of evidence available), link to the review questions and objectives, and consider the relevance to key groups. |                    |
| Limitations                                   | 20   | Discuss the limitations of the scoping review process.                                                                                                                                          |                    |
| Conclusions                                   | 21   | Provide a general interpretation of the results with respect to the review questions and objectives, as well as potential implications and/or next steps.                                       |                    |
| <b>FUNDING</b>                                |      |                                                                                                                                                                                                 |                    |
| Funding                                       | 22   | Describe sources of funding for the included sources of evidence, as well as sources of funding for the scoping review. Describe the role of the funders of the scoping review.                 |                    |

JBI = Joanna Briggs Institute; PRISMA-ScR = Preferred Reporting Items for Systematic reviews and Meta-Analyses extension for Scoping Reviews.

\* Where *sources of evidence* (see second footnote) are compiled from, such as bibliographic databases, social media platforms, and Web sites.

† A more inclusive/heterogeneous term used to account for the different types of evidence or data sources (e.g., quantitative and/or qualitative research, expert opinion, and policy documents) that may be eligible in a scoping review as opposed to only studies. This is not to be confused with *information sources* (see first footnote).

‡ The frameworks by Arksey and O'Malley (6) and Levac and colleagues (7) and the JBI guidance (4, 5) refer to the process of data extraction in a scoping review as data charting.

§ The process of systematically examining research evidence to assess its validity, results, and relevance before using it to inform a decision. This term is used for items 12 and 19 instead of "risk of bias" (which is more applicable to systematic reviews of interventions) to include and acknowledge the various sources of evidence that may be used in a scoping review (e.g., quantitative and/or qualitative research, expert opinion, and policy document).

From: Tricco AC, Lillie E, Zarin W, O'Brien KK, Colquhoun H, Levac D, et al. PRISMA Extension for Scoping Reviews (PRISMA-ScR): Checklist and Explanation. *Ann Intern Med.* 2018;169:467–473. doi: [10.7326/M18-0850](https://doi.org/10.7326/M18-0850).



### Annex B – Search Strategy Summary for the Scoping Review

|                                                    |                                                                                                                                                                                                                                                                                                                                                                                                               |
|----------------------------------------------------|---------------------------------------------------------------------------------------------------------------------------------------------------------------------------------------------------------------------------------------------------------------------------------------------------------------------------------------------------------------------------------------------------------------|
| Period search was conducted                        | 15 July 2021 to 31 August 2021                                                                                                                                                                                                                                                                                                                                                                                |
| Inclusion criteria                                 | <ul style="list-style-type: none"> <li>• Mental Health Service User</li> <li>• Psychiatric patients</li> <li>• Chronic mental illness</li> <li>• Vocational rehabilitation</li> <li>• Psychosocial rehabilitation</li> <li>• Occupational therapy</li> <li>• Low-income, low-middle- income and upper-middle-income countries</li> <li>• English language</li> <li>• Published from 2011 and later</li> </ul> |
| Exclusion criteria                                 | <ul style="list-style-type: none"> <li>• Systematic and scoping reviews</li> <li>• Source published in other languages, not English.</li> <li>• Sources published prior to 2011.</li> <li>• Sources from high-income countries</li> <li>• Full-text not available</li> </ul>                                                                                                                                  |
| Libraries                                          | Worldwide                                                                                                                                                                                                                                                                                                                                                                                                     |
| Pubmed, Medline, CINAHL, PsycInfo, Science Direct, | "Mental disorders"[MESH] AND (Severe OR Chronic OR long-term OR persistent) AND ("Psychiatric Rehabilitation"[Mesh]) OR "Rehabilitation, Vocational"[Mesh] OR "work rehabilitation" OR "Occupational Therapy"[MESH])                                                                                                                                                                                          |
| Google Scholar, HINARI and Wiley online            | ("Vocational Rehab"* OR "Work Rehab*") AND ("Severe mental illness" OR "Chronic Mental illness") AND "Occupational Therapy" NOT ("North America" or Europe*)                                                                                                                                                                                                                                                  |
| EBSCOhost, Cochrane library, Scopus,               | ( ("Psychiatric Rehabilitation" OR "Rehabilitation, Vocational" OR "work rehabilitation" OR "Occupational Therapy" ) AND ( mental disorders OR mental illness OR psychiatric disorders OR psychiatric illness ) NOT ( ("North America" OR Europe* ) ) AND ( (severe OR chronic OR long-term OR persistent) ).                                                                                                 |
| Grey Literature Sources                            | <a href="https://libguides.sun.ac.za/medicine/e-theses">https://libguides.sun.ac.za/medicine/e-theses</a><br><a href="https://wiki.lib.sun.ac.za/index.php/SUNScholar/Completed_theses_and_dissertations">https://wiki.lib.sun.ac.za/index.php/SUNScholar/Completed_theses_and_dissertations</a>                                                                                                              |



## Summary of Findings

| Authors & year of publication     | Title                                                                                                                                                                            | Aim of Study                                                                                                                                                                        | Type of Mental Healthcare Institution                                                                                                    | VR Intervention Type(s)                                                                                     | Duration of Intervention                      | VR Intervention Principles | VR Intervention Strategies                                                                                                                                                                                                                                                                       | VR Intervention outcomes                                                                                                                                                                                                                                                                                                                                                                                                                                                                                                                                                                   | Main Conclusion                                                                                                                                                                                                                                                                                                                                                                                                                            |
|-----------------------------------|----------------------------------------------------------------------------------------------------------------------------------------------------------------------------------|-------------------------------------------------------------------------------------------------------------------------------------------------------------------------------------|------------------------------------------------------------------------------------------------------------------------------------------|-------------------------------------------------------------------------------------------------------------|-----------------------------------------------|----------------------------|--------------------------------------------------------------------------------------------------------------------------------------------------------------------------------------------------------------------------------------------------------------------------------------------------|--------------------------------------------------------------------------------------------------------------------------------------------------------------------------------------------------------------------------------------------------------------------------------------------------------------------------------------------------------------------------------------------------------------------------------------------------------------------------------------------------------------------------------------------------------------------------------------------|--------------------------------------------------------------------------------------------------------------------------------------------------------------------------------------------------------------------------------------------------------------------------------------------------------------------------------------------------------------------------------------------------------------------------------------------|
| Adriana D.B. Vizzotto et al. 2016 | A pilot randomized controlled trial of the Occupational Goal Intervention method for the improvement of executive functioning in patients with treatment-resistant schizophrenia | To test the efficacy of the Occupational Goal Intervention (OGI) method for the improvement of EF in patients with TRS.                                                             | Schizophrenia Research Program of the institute of psychiatry - University of Sao Paulo School of Medicine. (Sao Paulo General Hospital) | Goal Management Training (GMT) method                                                                       | 15 weeks, 30 sessions, 90 minutes per session | Not stated                 | In the OGI group, the initial sessions targeted ADL (personal hygiene), followed by IADL (housework, money management, and use of transportation), social activities, and leisure. Each patient was given four homework assignments in order to practice the daily living tasks they had learned | Outcome measures correlate significantly with the total PANSS score, showing that the degree of severity of schizophrenia is inversely related to the improvement of EF (BADs), Functional Outcome (DAFS-BR) and patient autonomy (ILSS-BR). With regards to effect analysis, over the course of the study period, there were no major changes regarding the clinical stability of the patients. Results suggest that the use of the OGI method is an effective strategy that can benefit patients with TRS. As expected, outcome measures were shown to be significantly intercorrelated. | "The OGI method has been shown to be reliable and effective for patients with TRS. In addition, the method appears to improve social and functional aspects of patients with TRS."                                                                                                                                                                                                                                                         |
| Hester van Biljon et al. 2015     | An Action Research Approach to Profile an Occupational Therapy Vocational Rehabilitation Service in Public Healthcare                                                            | The aim of the project was to develop a tool that would allow occupational therapists doing vocational rehabilitation, to systematically and comprehensively profile their services | Not stated                                                                                                                               | Return to work program. Job-seeker programs and related support. Prevocational skills training and support. | Not stated                                    | Not stated                 | Work-hardening, work readiness, conditioning.                                                                                                                                                                                                                                                    | Not stated                                                                                                                                                                                                                                                                                                                                                                                                                                                                                                                                                                                 | Having a comprehensive and contextually relevant tool that effectively indicates what a vocational rehabilitation service looks like, and /or should look like, will be helpful to occupational therapists that are offering, or wish to offer, vocational rehabilitation services in the public healthcare as well as in private practices. This allows them to set goals and develop their practices in a systematic and mindful manner. |

1  
2  
3  
4  
5  
6  
7  
8  
9  
10  
11  
12  
13  
14  
15  
16  
17  
18  
19  
20  
21  
22  
23  
24  
25  
26  
27  
28  
29  
30  
31  
32  
33  
34  
35  
36  
37  
38  
39  
40  
41  
42  
43  
44  
45  
46

|                                |                                                                                                        |                                                                                                                                                         |                                            |                                                                                                                                      |            |                                                                                                                                                             |                                                                                                                                                                                                                                                                                                         |                                                                                                                                |                                                                                                                                                                                                                                                                                                                                                                                                                                                        |
|--------------------------------|--------------------------------------------------------------------------------------------------------|---------------------------------------------------------------------------------------------------------------------------------------------------------|--------------------------------------------|--------------------------------------------------------------------------------------------------------------------------------------|------------|-------------------------------------------------------------------------------------------------------------------------------------------------------------|---------------------------------------------------------------------------------------------------------------------------------------------------------------------------------------------------------------------------------------------------------------------------------------------------------|--------------------------------------------------------------------------------------------------------------------------------|--------------------------------------------------------------------------------------------------------------------------------------------------------------------------------------------------------------------------------------------------------------------------------------------------------------------------------------------------------------------------------------------------------------------------------------------------------|
| Ikenna D. Ebuenyi et al. 2019  | Employability of Persons With Mental Disability: Understanding Lived Experiences in Kenya              | To highlight the barriers to employment experienced by persons with mental disabilities in Kenya and how they manage to find work against all the odds. | Not stated                                 | Social networks for persons with mental disabilities. Provision of reasonable accommodation in the workplace and healthcare sectors. | Not stated | Not stated                                                                                                                                                  | Setting up social development programs that would provide individuals who want to opt for self-employment. Community based rehabilitation.                                                                                                                                                              | Not stated                                                                                                                     | Our study has highlighted that persons with mental disabilities in Kenya can work. We have also shed light on the various challenges (personal and environmental) affected persons encounter in their quest to enjoy their fundamental human right to employment.                                                                                                                                                                                      |
| Chitra Khare et al 2020        | Employment functioning in people with severe mental illnesses living in urban vs. rural areas in India | To examine rates and patterns of work, interest in work, and perceived benefits and barriers to work in people with SMI.                                | Private Psychiatric outpatients department | Supported employment                                                                                                                 | Not stated | Not stated                                                                                                                                                  | Teaching illness self-management skills in supported employment. Systematic involvement of families in supported employment, including help with job finding through their extended social networks, collaboration on mental illness management, and facilitating work in family business.              | Not stated                                                                                                                     | The findings suggest that attention should be paid to adapting models of vocational rehabilitation to the cultural context of developing countries to improve the employment outcomes of persons with SMI.                                                                                                                                                                                                                                             |
| Reema Samuel, K. S. Jacob 2017 | Occupational therapy in India: focus on functional recovery and need for empowerment                   | To discuss the role of occupational therapy in bridging the gap between symptomatic improvement and functional recovery.                                | Not stated                                 | Not stated                                                                                                                           | Not stated | Patient and family empowerment. Focus on achieving functional recovery. Optimizing the fit between an individual's abilities and the environmental demands. | Group therapy. Motivational enhancement therapy. Rehabilitative and recovery model (prevocational evaluation, vocational training, life skills training). Cognitive therapy. Behaviour therapy approaches. Graded exercises to manage deficient or maladaptive task and social and occupational skills. | Improved and enhanced self-esteem through graded tasks, improved goal setting, and problem-solving and decision-making skills. | While it can be argued that the Indian government should modify legislation, open more tertiary care hospitals, grant more educational institutions to train personnel, and likewise, it is time to look at modifiable factors from an individual perspective. The answer might lie in improving one's own understanding of the complexity of mental illness, increasing the repertoire of treatment models, liaising with the multidisciplinary team, |

|                                |                                                                                                                           |                                                                                                                                        |            |                                                                                                                                                                                                                                                                                                                                                                                                                                                                                                                                                                                                                                                                                                                                                                                                                                                                |            |            |                                                                                                                                                                                                                                                                                                                                                                                                                                     |            |                                                                                                                                                                                                                                                                                                                                                                                                                                                                        |
|--------------------------------|---------------------------------------------------------------------------------------------------------------------------|----------------------------------------------------------------------------------------------------------------------------------------|------------|----------------------------------------------------------------------------------------------------------------------------------------------------------------------------------------------------------------------------------------------------------------------------------------------------------------------------------------------------------------------------------------------------------------------------------------------------------------------------------------------------------------------------------------------------------------------------------------------------------------------------------------------------------------------------------------------------------------------------------------------------------------------------------------------------------------------------------------------------------------|------------|------------|-------------------------------------------------------------------------------------------------------------------------------------------------------------------------------------------------------------------------------------------------------------------------------------------------------------------------------------------------------------------------------------------------------------------------------------|------------|------------------------------------------------------------------------------------------------------------------------------------------------------------------------------------------------------------------------------------------------------------------------------------------------------------------------------------------------------------------------------------------------------------------------------------------------------------------------|
|                                |                                                                                                                           |                                                                                                                                        |            |                                                                                                                                                                                                                                                                                                                                                                                                                                                                                                                                                                                                                                                                                                                                                                                                                                                                |            |            |                                                                                                                                                                                                                                                                                                                                                                                                                                     |            | changing our own attitudes about the treatment process, and practicing instead of preaching client-centeredness.                                                                                                                                                                                                                                                                                                                                                       |
| Hester M van Biljon et al 2016 | Opinions of occupational therapists on the positioning of vocational rehabilitation services in Gauteng Public Healthcare | To report on the opinions of occupational therapists on the positioning of vocational rehabilitation services in the Gauteng province. | Not stated | Prevention is an educative service for the prevention of injury at work and to create an awareness of good work practice, averting the development and/or exacerbation of pathology. Screening of general or specific work related skills is a short prescriptive process used to filter and effectively refer patients to more specialised therapists or facilities and supports efficient service delivery. Assessment services involve the assessment of the ability of a person who has an injury or illness's, to be able to work. Intervention services are programmes aimed at correcting or compensating for ability to work deficits. Placement services are the returning of patients to their own, alternative or new work in the open labour market; or to sheltered - or protected workshops. Follow up is done of patients who used the services | Not stated | Not stated | Stress management. Job modification, case management, pain management, work hardening, work preparation or readiness, work visits, work guidance, work-place accommodation, work adaptation, job seekers groups, self-employment initiatives, support groups and other return to work efforts. Job analysis. Vocational guidance and counselling, outpatient support groups, job acquainting, adaptation and accommodation efforts. | Not stated | The results of this survey showed a general lack of consensus amongst occupational therapists about what vocational rehabilitation services should be offered at the different levels of public healthcare. With singular exceptions the generic opinion was that occupational therapy's vocational rehabilitation services should be offered in public healthcare. No other opinions from this survey give guidance or insight to support planning and policy making. |

1  
2  
3  
4  
5  
6  
7  
8  
9  
10  
11  
12  
13  
14  
15  
16  
17  
18  
19  
20  
21  
22  
23  
24  
25  
26  
27  
28  
29  
30  
31  
32  
33  
34  
35  
36  
37  
38  
39  
40  
41  
42  
43  
44  
45  
46

|                              |                                                                                   |                                                                                                            |            |                                                                                                                                                                                                                                                                                                                                                                                              |            |                                                                       |                                                                                                                                                                                                                                                |            |                                                                                                                                                                                                                                                                                                                                                                                                                                                                                                                                                                                                    |
|------------------------------|-----------------------------------------------------------------------------------|------------------------------------------------------------------------------------------------------------|------------|----------------------------------------------------------------------------------------------------------------------------------------------------------------------------------------------------------------------------------------------------------------------------------------------------------------------------------------------------------------------------------------------|------------|-----------------------------------------------------------------------|------------------------------------------------------------------------------------------------------------------------------------------------------------------------------------------------------------------------------------------------|------------|----------------------------------------------------------------------------------------------------------------------------------------------------------------------------------------------------------------------------------------------------------------------------------------------------------------------------------------------------------------------------------------------------------------------------------------------------------------------------------------------------------------------------------------------------------------------------------------------------|
|                              |                                                                                   |                                                                                                            |            | offered, this could be with employers, referral sources, family members and the patients themselves                                                                                                                                                                                                                                                                                          |            |                                                                       |                                                                                                                                                                                                                                                |            |                                                                                                                                                                                                                                                                                                                                                                                                                                                                                                                                                                                                    |
| Tania Buys 2015              | Professional competencies in vocational rehabilitation: Results of a Delphi study | To identify professional competencies required to practice in the area of work by occupational therapists. | Not stated | Vocational training, placement and follow-up. Work readiness/ work preparation programmes                                                                                                                                                                                                                                                                                                    | Not stated | Client centered, objectivity, adaptability, professionalism, respect. | Vocational guidance, job analysis, workplace visits, job description review, reasonable accommodations, work hardening, work conditioning, work simulation, life skills, stress management, prevocational skills, job-seeking skills training. | Not stated | We need to as an occupational therapy profession to ensure that we provide competent, professional, contextually relevant vocational rehabilitation services to clients which enables them to fulfil their roles as independent citizens in a democratic South Africa free from disability discrimination.                                                                                                                                                                                                                                                                                         |
| Kreshnee Govender et al 2018 | The role of the occupational therapist in case management in South Africa         | To identify the occupational therapist's role and scope of practice in case management in South Africa.    | Not stated | Case management - appears to be utilised as part of an early intervention approach once there has been an extended period of absence from work or a high rate of absence due to illness (where the service entails comprehensive assessment to determine a care plan and coordinating and monitoring client care to prevent long term absenteeism thereby contributing to cost containment). | Not stated | Planning with the client. Client advocacy.                            | Work site visits. Liaison with the employer to aid in the employee's transition back to work, client's reintegration in the work environment. Develop a care plan. Re-skilling/training to aid in a work re-entry.                             | Not stated | The study reveals that occupational therapists in South Africa are involved in case manager functions and are implementing case management as a strategy or approach to manage incapacity due to ill-health and disability in the workplace. Occupational therapists in South Africa that are positioned in various settings viz. insurance, private practice, health consulting, and Workmen's Compensation, have indicated involvement in case management and this study confirmed the utilisation of this intervention in vocational rehabilitation and as an element of disability management. |

|                                                       |                                                                   |                                                                                      |                                                                                                     |                                                                                                                                                                                                                                                                                                                                                                                                                                                                                                  |            |            |                                                                                                                                                                                                                                                                                                                                      |                                                                                             |                                                                                                                                                                                                                                                                                                                                                                                                                                                                                                                                                                                                                                                                                                                                                                                                                                                                                                                                                                                                   |
|-------------------------------------------------------|-------------------------------------------------------------------|--------------------------------------------------------------------------------------|-----------------------------------------------------------------------------------------------------|--------------------------------------------------------------------------------------------------------------------------------------------------------------------------------------------------------------------------------------------------------------------------------------------------------------------------------------------------------------------------------------------------------------------------------------------------------------------------------------------------|------------|------------|--------------------------------------------------------------------------------------------------------------------------------------------------------------------------------------------------------------------------------------------------------------------------------------------------------------------------------------|---------------------------------------------------------------------------------------------|---------------------------------------------------------------------------------------------------------------------------------------------------------------------------------------------------------------------------------------------------------------------------------------------------------------------------------------------------------------------------------------------------------------------------------------------------------------------------------------------------------------------------------------------------------------------------------------------------------------------------------------------------------------------------------------------------------------------------------------------------------------------------------------------------------------------------------------------------------------------------------------------------------------------------------------------------------------------------------------------------|
| Occupational Therapy Association Of South Africa 2020 | Position paper on vocational rehabilitation                       | Not stated                                                                           | Various settings including schools for learners with special needs transitioning to world of world. | Prevention is an educative service for the prevention of injury at work and to create an awareness of good work practice, averting the development and/or exacerbation of pathology. Screening of general or specific work related skills is a short prescriptive process used to filter and effectively refer patients to more experienced therapists. Assessment and evaluation services. Intervention services are aimed at correcting adapting or compensating for ability to work deficits. | Not stated | Not stated | Skills training, sheltered workshops, entrepreneurial and self-employment initiatives. Job modification, case management, work trials, work hardening, work preparation/readiness, work visits, work/vocational guidance and counselling, work-palce accommodation, work adaption, job seekers groups, support groups. Job analysis, | Not stated                                                                                  | The primary aim of occupational therapy's vocational rehabilitation intervention needs to be relevant and of therapeutic value to the client so as to meet SDG9 as far as it is possible. The type of vocational rehabilitation service that occupational therapists in South Africa offer should be dictated by the vocational needs and aspirations, social structures and contextual realities of the clients. All occupational therapists can and should be able to offer basic vocational rehabilitation. Newly qualified occupational therapists have to be able to work independently at a basic level in a variety of vocational rehabilitation settings. Those vocational rehabilitation services that require competencies beyond a basic level need to be referred to therapists who have acquired, and can provide proof of the additional necessary competencies that provide competent, professional, contextually relevant vocational rehabilitation services to clients they see. |
| Madri Engelbrecht et al 2017                          | Supported Employment for people with mental disabilities in South | To report on the cost and affordability of SE services offered to people with mental | Psychiatric hospital in Cape Town (clients from forensic                                            | Supported employment                                                                                                                                                                                                                                                                                                                                                                                                                                                                             | Not stated | Not stated | Job matching. Work in protective factories. Personal life skills training (money                                                                                                                                                                                                                                                     | Reduction in the consumption of mental health services by people who entered employment. SE | Evidence from the study thus reflects the cost of SE services to people with mental disability as                                                                                                                                                                                                                                                                                                                                                                                                                                                                                                                                                                                                                                                                                                                                                                                                                                                                                                 |

|                             |                                                                                     |                                                                                                                                                                                                                             |                                                      |                      |            |                                                                                                                                                                                                                                                                                          |                                                                                                                                                                                                                                                                                                                                                                                                                                                                                                               |                                                                                                                                                                                                                                                                                                                                                                                                                                                                                                                                                             |                                                                                                                                                                                                                                                                                                                                                                                                                                                                           |
|-----------------------------|-------------------------------------------------------------------------------------|-----------------------------------------------------------------------------------------------------------------------------------------------------------------------------------------------------------------------------|------------------------------------------------------|----------------------|------------|------------------------------------------------------------------------------------------------------------------------------------------------------------------------------------------------------------------------------------------------------------------------------------------|---------------------------------------------------------------------------------------------------------------------------------------------------------------------------------------------------------------------------------------------------------------------------------------------------------------------------------------------------------------------------------------------------------------------------------------------------------------------------------------------------------------|-------------------------------------------------------------------------------------------------------------------------------------------------------------------------------------------------------------------------------------------------------------------------------------------------------------------------------------------------------------------------------------------------------------------------------------------------------------------------------------------------------------------------------------------------------------|---------------------------------------------------------------------------------------------------------------------------------------------------------------------------------------------------------------------------------------------------------------------------------------------------------------------------------------------------------------------------------------------------------------------------------------------------------------------------|
|                             | Africa: cost calculation of service utilisation                                     | disabilities in South Africa.                                                                                                                                                                                               | wards, general wards and the outpatient department). |                      |            |                                                                                                                                                                                                                                                                                          | handling, grooming, use of transportation, management of symptoms, time management, communication). Simulated work. Trial placement, job advocacy ( at job site with employers and co-workers). Evaluation of goodness of job fit. Evaluation of employment potential. Work visit ( to observe real work, to discuss reasonable accommodation, to assist with performance appraisal). Job coaching and job support. Bridging programme in preparation for employment in the open labour market. Support group | promotes an outcome of open labour market employment with the associated monetary and non-monetary benefits.                                                                                                                                                                                                                                                                                                                                                                                                                                                | substantially lower than the current government investment in disability grants and protective workshops subsidies. SE will combat unemployment, work towards poverty reduction and redress inequality as it pertains to people with disabilities. engagement with funding sources that currently support traditional vocational rehabilitation approaches is needed to present SE as a viable alternative strategy for return-to-work endeavors.                         |
| Lana Van Niekerk et al 2011 | Supported employment: Recommendations for successful implementation in South Africa | To report on the findings of a descriptive qualitative study in which supported employment (SE), as a potential strategy to facilitate the employment of persons with disability in the open labour market in South Africa. | Not stated                                           | Supported employment | Not stated | Competitive employment should always be the ultimate outcome. A client-centered approach should be used. Support should be provided to ensure long-term sustainability employment. Support consumer goals and empower them with choices and information. No more support than needed and | Job finding, job analysis, job matching, job coaching. On-going support that is determined by the worker's individual needs. Protective and sheltered workshops.                                                                                                                                                                                                                                                                                                                                              | SE achieve participation in competitive employment. Participants in SE earned more and worked more hours per month than those who had had prevocational training. Person with disabilities have an opportunity to be an active and contributing member of the society. Lessen the economic burden the government. Positively influence the disabled person's health and well-being. Provided income, personal development, provided arena for social development, self esteem and identity. Integration of persons with disability into mainstream society. | "The authors propose SE as a model of choice to drive the process of economic empowerment for persons facing disabling conditions. In developing a SE model suitable for South Africa, funding and infrastructure should be used in such a way that integrated career management is a viable option for persons with disability. A holistic approach is needed because components of SE, such as the assessment of work skills, placement in suitable work and reasonable |

|                             |                                                                                                            |                                                                                                                                                                          |                                                                                                               |                                                                                                                                                                                         |            |                                                     |                                                                                                                                                                                                                                                                                                                                                                                                                                                                                                                                         |                                                                                                                                  |                                                                                                                                                                                                                                                                                                                                                                                                                                                                                    |
|-----------------------------|------------------------------------------------------------------------------------------------------------|--------------------------------------------------------------------------------------------------------------------------------------------------------------------------|---------------------------------------------------------------------------------------------------------------|-----------------------------------------------------------------------------------------------------------------------------------------------------------------------------------------|------------|-----------------------------------------------------|-----------------------------------------------------------------------------------------------------------------------------------------------------------------------------------------------------------------------------------------------------------------------------------------------------------------------------------------------------------------------------------------------------------------------------------------------------------------------------------------------------------------------------------------|----------------------------------------------------------------------------------------------------------------------------------|------------------------------------------------------------------------------------------------------------------------------------------------------------------------------------------------------------------------------------------------------------------------------------------------------------------------------------------------------------------------------------------------------------------------------------------------------------------------------------|
|                             |                                                                                                            |                                                                                                                                                                          |                                                                                                               |                                                                                                                                                                                         |            | no less than necessary.                             |                                                                                                                                                                                                                                                                                                                                                                                                                                                                                                                                         |                                                                                                                                  | accommodation do not necessarily follow a linear process."                                                                                                                                                                                                                                                                                                                                                                                                                         |
| Lana Van Niekerk et al 2015 | Time utilisation trends of supported employment services by persons with mental disability in South Africa | To determine the feasibility of supported employment (SE) as a strategy with which to facilitate the employment of persons with disability in competitive work contexts. | Psychiatric hospital in Cape Town (clients from forensic wards, general wards and the outpatient department). | Supported employment (SE) is a return-to-work strategy promoting the inclusion of persons with disabilities in competitive employment environments. Prepare work placement. Work visit. | Not stated | On-going support. Individualized support. Advocacy. | Job finding, Job analysis, Job matching and Job coaching. Reasonable accommodation. On-going support. Protective workshops. Non-job advocacy. Personal life skills. Simulated work. Trial placement, Person-centred instructional plans, Job advocacy - at job site with employers. Job advocacy - co-workers (and customers). Evaluation of employment potential. Evaluation of goodness of job fit. Work visit to observe real work. Work visit to discuss reasonable accommodation. Work visit to assist with performance appraisal. | To achieve employment outcomes for people with mental disabilities. Integration of mental health service users in the workplace. | SE services can be considered as a viable option for return to work in resource-constrained environments. Providers of SE services will need to modify approaches in order to meet contextual realities. Because the bulk of costs associated with SE are in the remuneration of service providers, understanding the number of provider hours necessary will be an important consideration for employers in middle income countries who are concerned with the feasibility of SE. |
