# Supplementary material for: Scoping review exploring vocational rehabilitation interventions for mental health service users with chronic mental illness in low-income to upper-middle-income countries
Source: PubMed Central journal article supplement — BMJ Open. 2022 May 9;12(5):e059211. doi: 10.1136/bmjopen-2021-059211 (PMC9086611; doi:10.1136/bmjopen-2021-059211), 2022-05-09
Supplement: bmjopen-2021-059211supp002.pdf [file bmjopen-2021-059211supp002.pdf]

**Annex B – Search Strategy Summary for the Scoping Review**

|                                                    |                                                                                                                                                                                                                                                                                                                                                                                                               |
|----------------------------------------------------|---------------------------------------------------------------------------------------------------------------------------------------------------------------------------------------------------------------------------------------------------------------------------------------------------------------------------------------------------------------------------------------------------------------|
| Period search was conducted                        | 15 July 2021 to 31 August 2021                                                                                                                                                                                                                                                                                                                                                                                |
| Inclusion criteria                                 | <ul style="list-style-type: none"> <li>• Mental Health Service User</li> <li>• Psychiatric patients</li> <li>• Chronic mental illness</li> <li>• Vocational rehabilitation</li> <li>• Psychosocial rehabilitation</li> <li>• Occupational therapy</li> <li>• Low-income, low-middle- income and upper-middle-income countries</li> <li>• English language</li> <li>• Published from 2011 and later</li> </ul> |
| Exclusion criteria                                 | <ul style="list-style-type: none"> <li>• Systematic and scoping reviews</li> <li>• Source published in other languages, not English.</li> <li>• Sources published prior to 2011.</li> <li>• Sources from high-income countries</li> <li>• Full-text not available</li> </ul>                                                                                                                                  |
| Libraries                                          | Worldwide                                                                                                                                                                                                                                                                                                                                                                                                     |
| Pubmed, Medline, CINAHL, PsycInfo, Science Direct, | "Mental disorders"[MESH] AND (Severe OR Chronic OR long-term OR persistent) AND ("Psychiatric Rehabilitation"[Mesh]) OR "Rehabilitation, Vocational"[Mesh] OR "work rehabilitation" OR "Occupational Therapy"[MESH])                                                                                                                                                                                          |
| Google Scholar, HINARI and Wiley online            | ("Vocational Rehab"* OR "Work Rehab*") AND ("Severe mental illness" OR "Chronic Mental illness") AND "Occupational Therapy" NOT ("North America" or Europe*)                                                                                                                                                                                                                                                  |
| EBSCOhost, Cochrane library, Scopus,               | ( ("Psychiatric Rehabilitation" OR "Rehabilitation, Vocational" OR "work rehabilitation" OR "Occupational Therapy" ) AND ( mental disorders OR mental illness OR psychiatric disorders OR psychiatric illness ) NOT ( ("North America" OR Europe*) ) AND ( (severe OR chronic OR long-term OR persistent) ).                                                                                                  |
| Grey Literature Sources                            | <a href="https://libguides.sun.ac.za/medicine/e-theses">https://libguides.sun.ac.za/medicine/e-theses</a><br><a href="https://wiki.lib.sun.ac.za/index.php/SUNScholar/Completed_theses_and_dissertations">https://wiki.lib.sun.ac.za/index.php/SUNScholar/Completed_theses_and_dissertations</a>                                                                                                              |
